# Supplementary material for: Natural Allelic Diversity, Genetic Structure and Linkage Disequilibrium Pattern in Wild Chickpea
Source: PubMed Central journal article supplement (PMC4164632; doi:10.1371/journal.pone.0107484), 2014-09-15
Supplement: pone.0107484.s002.pdf [file pone.0107484.s002.pdf]

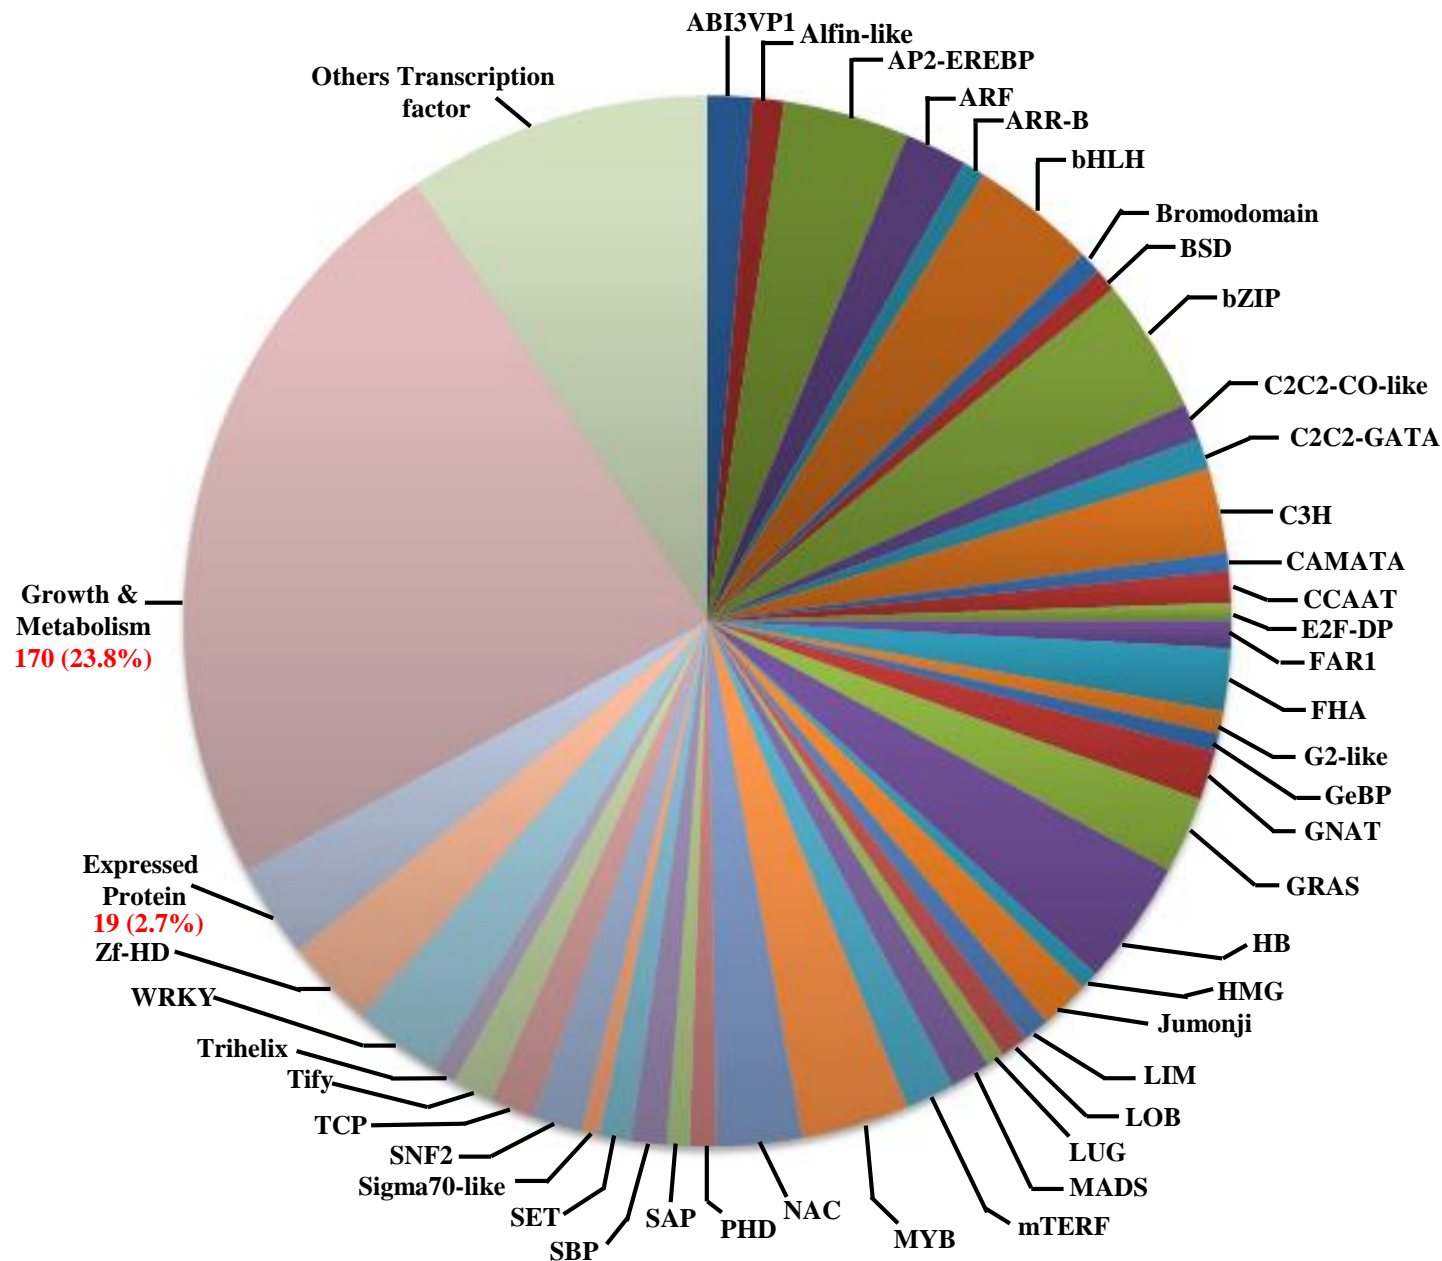

**Figure S2:** Functional annotation of informative 334 microsatellite and 380 SNP markers validated in the genes showed maximum correspondence to transcription factor gene families (73.5%), followed by genes controlling growth and metabolism enzymes (23.8%) and expressed proteins (2.7%)
