# Supplementary material for: Natural Allelic Diversity, Genetic Structure and Linkage Disequilibrium Pattern in Wild Chickpea
Source: PubMed Central journal article supplement (PMC4164632; doi:10.1371/journal.pone.0107484), 2014-09-15
Supplement: pone.0107484.s003.pdf [file pone.0107484.s003.pdf]

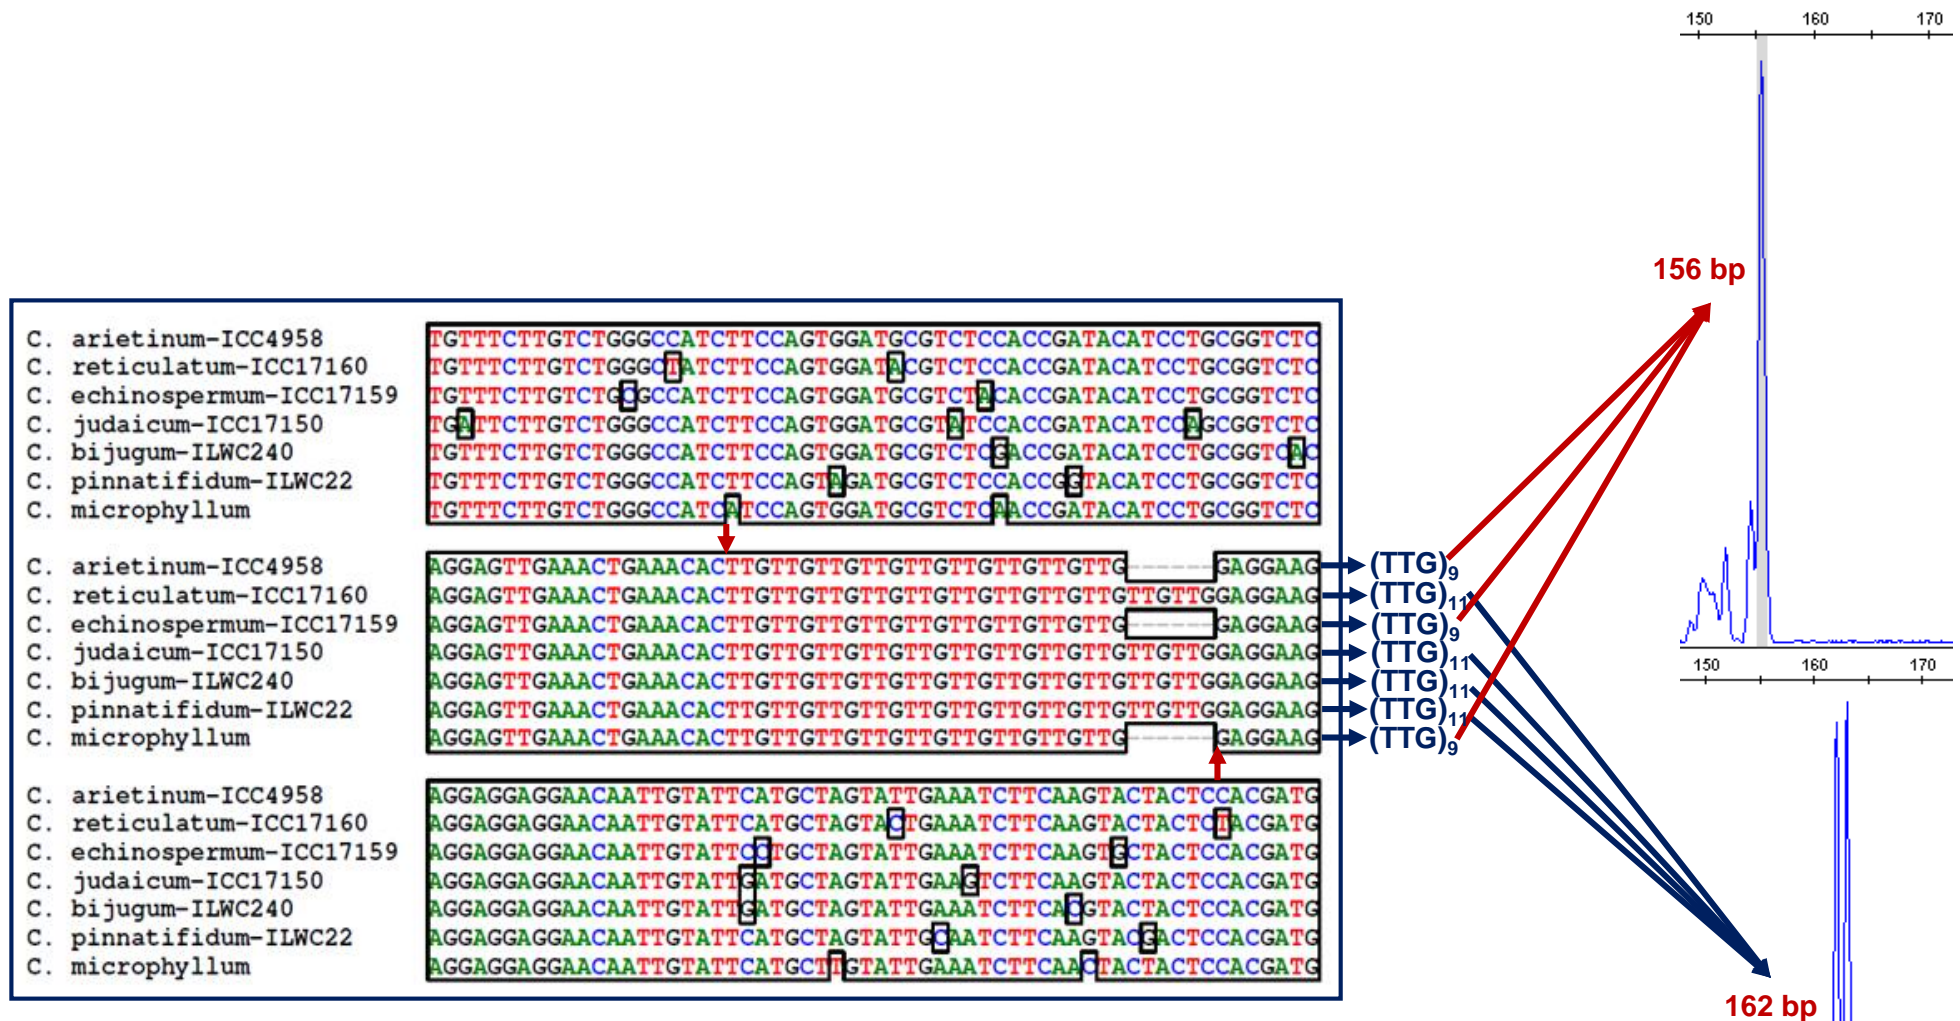

**Figure S3:** The sequencing of cloned amplicons from a microsatellite marker showing fragment length polymorphism (156 and 162 bp) among cultivated and wild accessions, validated the presence of expected repeat-motifs (TTG)<sub>n</sub> and further corresponded with their expansion/contraction [(TTG)<sub>9</sub>/(TTG)<sub>11</sub>] of number of repeat-units.
