# Supplementary material for: Natural Allelic Diversity, Genetic Structure and Linkage Disequilibrium Pattern in Wild Chickpea
Source: PubMed Central journal article supplement (PMC4164632; doi:10.1371/journal.pone.0107484), 2014-09-15
Supplement: pone.0107484.s005.pdf [file pone.0107484.s005.pdf]

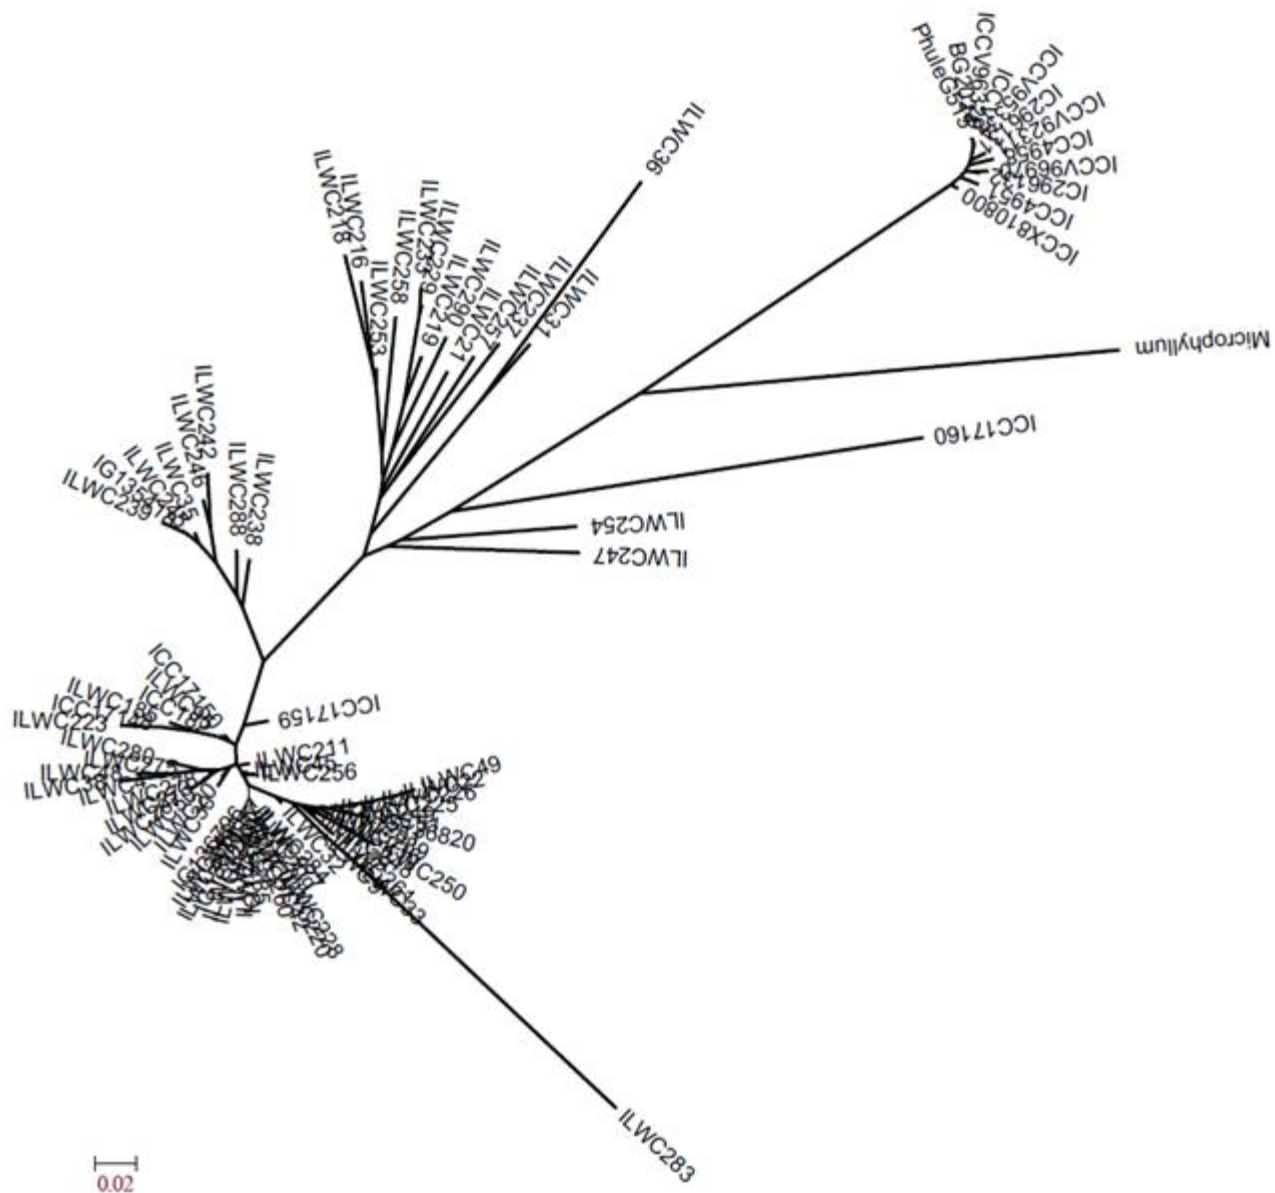

**Figure S5:** Unrooted phylogenetic tree depicting the genetic relationships among 94 cultivated and wild accessions belonging to seven *Cicer* species based on Nei's genetic distance using 380 TF gene-derived SNP markers. Molecular classification is not able to differentiate accessions into six different clusters as expected based on their species and gene pools of origination.
