# Supplementary material for: Natural Allelic Diversity, Genetic Structure and Linkage Disequilibrium Pattern in Wild Chickpea
Source: PubMed Central journal article supplement (PMC4164632; doi:10.1371/journal.pone.0107484), 2014-09-15
Supplement: pone.0107484.s007.pdf [file pone.0107484.s007.pdf]

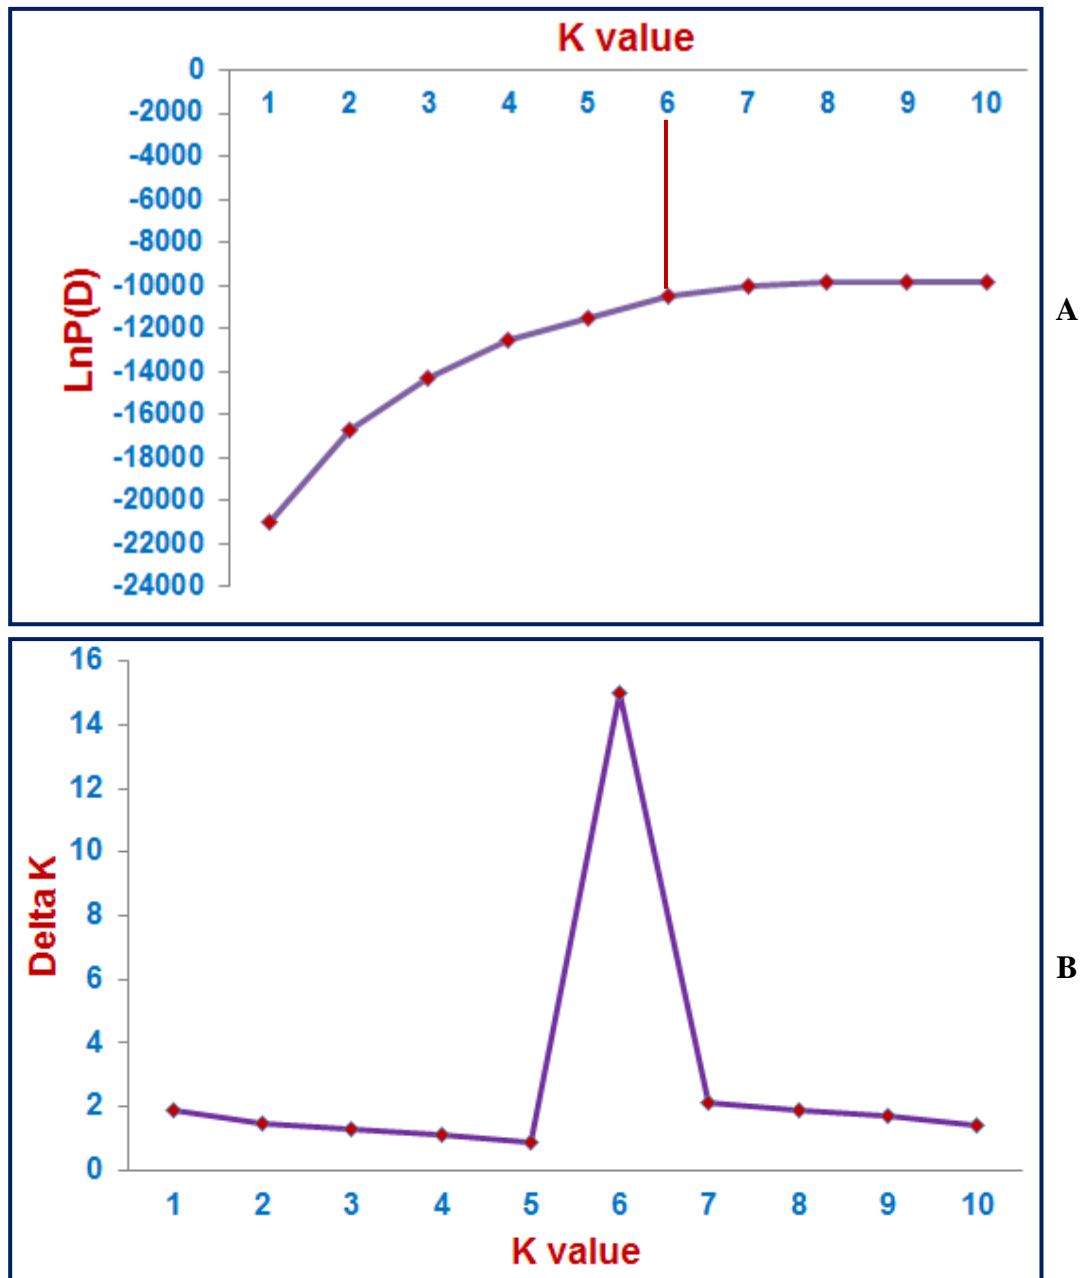

**Figure S7:** Optimization of number of populations (K value) varying from K = 1 to 10 to determine best possible population number for 94 cultivated and wild *Cicer* accessions using the *ad hoc* procedure (A) of STRUCTURE documented by Pritchard et al. (2000) and second order statistics (delta K) (B) of Evanno et al. (2005).
