# Supplementary material for: Natural Allelic Diversity, Genetic Structure and Linkage Disequilibrium Pattern in Wild Chickpea
Source: PubMed Central journal article supplement (PMC4164632; doi:10.1371/journal.pone.0107484), 2014-09-15
Supplement: pone.0107484.s008.pdf [file pone.0107484.s008.pdf]

**Table S1: Wild and cultivated *Cicer* accessions used in the study and their inferred ancestry coefficients in population genetic structure analysis**

| Sl. No. | <i>Cicer</i> species                       | Accession No. | Cultivar types | Geographical origin | Inferred ancestry among <i>Cicer</i> accessions |                        |                          |                        |                      |                        |
|---------|--------------------------------------------|---------------|----------------|---------------------|-------------------------------------------------|------------------------|--------------------------|------------------------|----------------------|------------------------|
|         |                                            |               |                |                     | Population I (POP I)                            | Population II (POP II) | Population III (POP III) | Population IV (POP IV) | Population V (POP V) | Population VI (POP VI) |
| 1       | <i>C. arietinum</i><br>(annual cultivated) | ICCX810800    | <i>desi</i>    | India               | <b>0.999</b>                                    | 0                      | 0                        | 0                      | 0                    | 0                      |
| 2       |                                            | IC296132      | <i>desi</i>    | India               | <b>0.999</b>                                    | 0                      | 0                        | 0                      | 0                    | 0                      |
| 3       |                                            | ICCV96970     | <i>desi</i>    | India               | <b>0.999</b>                                    | 0                      | 0                        | 0                      | 0                    | 0                      |
| 4       |                                            | IC296131      | <i>desi</i>    | India               | <b>0.999</b>                                    | 0                      | 0                        | 0                      | 0                    | 0                      |
| 5       |                                            | ICC4958       | <i>desi</i>    | India               | <b>0.998</b>                                    | 0                      | 0                        | 0                      | 0.001                | 0                      |
| 6       |                                            | ICC4951       | <i>desi</i>    | India               | <b>0.999</b>                                    | 0                      | 0                        | 0                      | 0                    | 0                      |
| 7       |                                            | ICCV2         | <i>kabuli</i>  | India               | <b>0.999</b>                                    | 0                      | 0                        | 0                      | 0                    | 0                      |
| 8       |                                            | ICCV92311     | <i>kabuli</i>  | India               | <b>0.999</b>                                    | 0                      | 0                        | 0                      | 0                    | 0                      |
| 9       |                                            | ICCV95334     | <i>kabuli</i>  | India               | <b>0.999</b>                                    | 0                      | 0                        | 0                      | 0                    | 0                      |
| 10      |                                            | ICCV96329     | <i>kabuli</i>  | India               | <b>0.999</b>                                    | 0                      | 0                        | 0                      | 0                    | 0                      |
| 11      |                                            | BG2024        | <i>kabuli</i>  | India               | <b>0.999</b>                                    | 0                      | 0                        | 0                      | 0                    | 0                      |
| 12      |                                            | PhuleG515     | <i>kabuli</i>  | India               | <b>0.999</b>                                    | 0                      | 0                        | 0                      | 0                    | 0                      |
| 13      | <i>C. reticulatum</i><br>(annual wild)     | ICC17160      | Wild           | Turkey              | 0.025                                           | 0                      | 0                        | 0.008                  | <b>0.966</b>         | 0                      |
| 14      |                                            | ILWC290       | Wild           | Turkey              | 0.001                                           | 0.001                  | 0.005                    | 0.001                  | <b>0.99</b>          | 0.001                  |
| 15      |                                            | ILWC233       | Wild           | Turkey              | 0.001                                           | 0                      | 0.001                    | 0                      | <b>0.998</b>         | 0                      |
| 16      |                                            | ILWC253       | Wild           | Turkey              | 0                                               | 0                      | 0                        | 0                      | <b>0.998</b>         | 0                      |
| 17      |                                            | ILWC254       | Wild           | Turkey              | 0.098                                           | 0.001                  | 0.028                    | 0.009                  | <b>0.859</b>         | 0.005                  |
| 18      |                                            | ILWC237       | Wild           | Turkey              | 0.084                                           | 0                      | 0.053                    | 0.002                  | <b>0.859</b>         | 0.001                  |
| 19      |                                            | ILWC257       | Wild           | Turkey              | 0.001                                           | 0.001                  | 0.011                    | 0.001                  | <b>0.985</b>         | 0.001                  |
| 20      |                                            | ILWC218       | Wild           | Turkey              | 0                                               | 0                      | 0                        | 0                      | <b>0.998</b>         | 0                      |
| 21      |                                            | ILWC247       | Wild           | Turkey              | 0.044                                           | 0.001                  | 0.001                    | 0.001                  | <b>0.947</b>         | 0.005                  |
| 22      |                                            | ILWC229       | Wild           | Turkey              | 0                                               | 0                      | 0                        | 0                      | <b>0.998</b>         | 0                      |
| 23      |                                            | ILWC219       | Wild           | Turkey              | 0                                               | 0                      | 0                        | 0.001                  | <b>0.998</b>         | 0                      |
| 24      |                                            | ILWC242       | Wild           | Turkey              | 0                                               | 0.002                  | 0.379                    | 0.003                  | <b>0.582</b>         | 0.033                  |
| 25      |                                            | ILWC258       | Wild           | Turkey              | 0.107                                           | 0.001                  | 0.022                    | 0                      | <b>0.867</b>         | 0.003                  |
| 26      |                                            | ILWC21        | Wild           | Turkey              | 0.078                                           | 0.001                  | 0.196                    | 0.001                  | <b>0.722</b>         | 0.001                  |
| 27      |                                            | ILWC36        | Wild           | Turkey              | 0                                               | 0.003                  | 0.141                    | 0.002                  | <b>0.853</b>         | 0.001                  |
| 28      |                                            | ILWC216       | Wild           | Turkey              | 0                                               | 0                      | 0.235                    | 0                      | <b>0.764</b>         | 0.001                  |

|    |                                          |          |      |                      |       |       |              |       |       |              |
|----|------------------------------------------|----------|------|----------------------|-------|-------|--------------|-------|-------|--------------|
| 29 | <i>C. echinospermum</i><br>(annual wild) | ICC17159 | Wild | Turkey               | 0.008 | 0.09  | <b>0.858</b> | 0.001 | 0.001 | 0.042        |
| 30 |                                          | ILWC35   | Wild | Turkey               | 0     | 0.001 | <b>0.914</b> | 0.083 | 0     | 0.001        |
| 31 |                                          | IG135418 | Wild | Syrian Arab Republic | 0.001 | 0.006 | <b>0.991</b> | 0.001 | 0.001 | 0.001        |
| 32 |                                          | ILWC239  | Wild | Turkey               | 0.001 | 0     | <b>0.997</b> | 0.001 | 0     | 0            |
| 33 |                                          | ILWC245  | Wild | Turkey               | 0     | 0     | <b>0.998</b> | 0     | 0     | 0            |
| 34 |                                          | ILWC238  | Wild | Turkey               | 0     | 0     | <b>0.999</b> | 0     | 0     | 0            |
| 35 |                                          | ILWC246  | Wild | Turkey               | 0     | 0.003 | <b>0.995</b> | 0     | 0     | 0            |
| 36 |                                          | ILWC288  | Wild | Turkey               | 0     | 0     | <b>0.998</b> | 0     | 0     | 0.001        |
| 37 | <i>C. judaicum</i><br>(annual wild)      | ICC182   | Wild | ICRISAT, India       | 0     | 0.001 | 0.001        | 0.001 | 0     | <b>0.997</b> |
| 38 |                                          | ICC17150 | Wild | Lebanon              | 0     | 0.001 | 0.001        | 0.001 | 0     | <b>0.997</b> |
| 39 |                                          | ILWC95   | Wild | ICRISAT, India       | 0     | 0.001 | 0.001        | 0     | 0     | <b>0.997</b> |
| 40 |                                          | ILWC31   | Wild | Jordan               | 0.001 | 0.002 | 0.001        | 0.001 | 0.395 | <b>0.601</b> |
| 41 |                                          | ILWC185  | Wild | ICRISAT, India       | 0.001 | 0     | 0.004        | 0.001 | 0     | <b>0.994</b> |
| 42 |                                          | ICC17148 | Wild | Lebanon              | 0     | 0     | 0.001        | 0     | 0     | <b>0.998</b> |
| 43 |                                          | ILWC280  | Wild | Syrian Arab Republic | 0     | 0     | 0.001        | 0     | 0     | <b>0.998</b> |
| 44 |                                          | ILWC283  | Wild | Syrian Arab Republic | 0.005 | 0.001 | 0.001        | 0.001 | 0.001 | <b>0.991</b> |
| 45 |                                          | ILWC20   | Wild | Israel               | 0     | 0     | 0.004        | 0     | 0     | <b>0.994</b> |
| 46 |                                          | ILWC211  | Wild | Syrian Arab Republic | 0     | 0     | 0.001        | 0.001 | 0     | <b>0.997</b> |
| 47 |                                          | ILWC30   | Wild | Israel               | 0     | 0     | 0.001        | 0.001 | 0.001 | <b>0.997</b> |
| 48 |                                          | ILWC48   | Wild | Syrian Arab Republic | 0     | 0.001 | 0.001        | 0.001 | 0     | <b>0.998</b> |
| 49 |                                          | ILWC50   | Wild | Syrian Arab Republic | 0     | 0     | 0            | 0     | 0     | <b>0.999</b> |
| 50 |                                          | ILWC207  | Wild | Syrian Arab Republic | 0     | 0.001 | 0.001        | 0.001 | 0     | <b>0.997</b> |
| 51 |                                          | ILWC45   | Wild | Syrian Arab Republic | 0     | 0.103 | 0            | 0.001 | 0     | <b>0.895</b> |
| 52 |                                          | ILWC38   | Wild | Lebanon              | 0.001 | 0.001 | 0            | 0.001 | 0.01  | <b>0.986</b> |
| 53 |                                          | ILWC278  | Wild | Syrian Arab Republic | 0     | 0.001 | 0            | 0.001 | 0     | <b>0.997</b> |
| 54 |                                          | ILWC275  | Wild | Lebanon              | 0     | 0.001 | 0            | 0.001 | 0     | <b>0.997</b> |
| 55 |                                          | ILWC223  | Wild | Lebanon              | 0.001 | 0.01  | 0.001        | 0.001 | 0.001 | <b>0.986</b> |
| 56 |                                          | ILWC256  | Wild | Jordan               | 0     | 0.005 | 0.001        | 0.006 | 0.001 | <b>0.987</b> |
| 57 |                                          | ILWC273  | Wild | Lebanon              | 0     | 0.002 | 0.001        | 0.001 | 0.001 | <b>0.996</b> |
| 58 |                                          | ILWC4    | Wild | Lebanon              | 0.001 | 0.018 | 0            | 0.004 | 0.001 | <b>0.976</b> |

|    |                                                          |                                                       |          |                      |                      |              |       |              |              |       |       |
|----|----------------------------------------------------------|-------------------------------------------------------|----------|----------------------|----------------------|--------------|-------|--------------|--------------|-------|-------|
| 59 | <b><i>C. bijugum</i></b><br><b>(annual wild)</b>         | ILWC42                                                | Wild     | Syrian Arab Republic | 0                    | <b>0.842</b> | 0.001 | 0.002        | 0.001        | 0.154 |       |
| 60 |                                                          | IG136792                                              | Wild     | Syrian Arab Republic | 0                    | <b>0.998</b> | 0.001 | 0.001        | 0            | 0     |       |
| 61 |                                                          | IG136786                                              | Wild     | Syrian Arab Republic | 0                    | <b>0.997</b> | 0     | 0.002        | 0            | 0     |       |
| 62 |                                                          | ILWC277                                               | Wild     | Syrian Arab Republic | 0                    | <b>0.999</b> | 0     | 0            | 0            | 0     |       |
| 63 |                                                          | ILWC8                                                 | Wild     | Turkey               | 0                    | <b>0.998</b> | 0     | 0            | 0            | 0     |       |
| 64 |                                                          | ILWC228                                               | Wild     | Turkey               | 0                    | <b>0.997</b> | 0     | 0.001        | 0.001        | 0.001 |       |
| 65 |                                                          | ILWC240                                               | Wild     | Turkey               | 0                    | <b>0.999</b> | 0     | 0            | 0            | 0     |       |
| 66 |                                                          | ILWC241                                               | Wild     | Turkey               | 0                    | <b>0.998</b> | 0     | 0            | 0            | 0     |       |
| 67 |                                                          | ILWC260                                               | Wild     | Turkey               | 0                    | <b>0.999</b> | 0     | 0            | 0            | 0     |       |
| 68 |                                                          | ILWC217                                               | Wild     | Turkey               | 0                    | <b>0.998</b> | 0     | 0            | 0            | 0     |       |
| 69 |                                                          | ILWC209                                               | Wild     | Syrian Arab Republic | 0                    | <b>0.998</b> | 0     | 0.001        | 0            | 0     |       |
| 70 |                                                          | ILWC227                                               | Wild     | Turkey               | 0                    | <b>0.996</b> | 0.002 | 0.001        | 0            | 0.001 |       |
| 71 |                                                          | ILWC284                                               | Wild     | Turkey               | 0                    | <b>0.997</b> | 0.001 | 0.001        | 0            | 0.001 |       |
| 72 |                                                          | ILWC7                                                 | Wild     | Turkey               | 0                    | <b>0.997</b> | 0     | 0.002        | 0            | 0.001 |       |
| 73 |                                                          | ILWC220                                               | Wild     | Turkey               | 0.001                | <b>0.996</b> | 0.001 | 0.001        | 0            | 0.001 |       |
| 74 |                                                          | IG136796                                              | Wild     | Syrian Arab Republic | 0                    | <b>0.78</b>  | 0.001 | 0.218        | 0            | 0.001 |       |
| 75 |                                                          | ILWC285                                               | Wild     | Turkey               | 0                    | <b>0.579</b> | 0.001 | 0.407        | 0            | 0.012 |       |
| 76 |                                                          | ILWC286                                               | Wild     | Turkey               | 0                    | <b>0.486</b> | 0     | 0.512        | 0            | 0.001 |       |
| 77 |                                                          | ILWC32                                                | Wild     | Turkey               | 0                    | <b>0.423</b> | 0     | 0.575        | 0.001        | 0.001 |       |
| 78 |                                                          | <b><i>C. pinnatifidum</i></b><br><b>(annual wild)</b> | ILWC9    | Wild                 | Turkey               | 0            | 0.001 | 0            | <b>0.998</b> | 0     | 0     |
| 79 |                                                          |                                                       | ILWC22   | Wild                 | Turkey               | 0            | 0     | 0            | <b>0.998</b> | 0     | 0     |
| 80 |                                                          |                                                       | IG136820 | Wild                 | Syrian Arab Republic | 0            | 0     | 0            | <b>0.998</b> | 0     | 0     |
| 81 |                                                          |                                                       | ILWC251  | Wild                 | Turkey               | 0            | 0.001 | 0            | <b>0.997</b> | 0.001 | 0.001 |
| 82 |                                                          |                                                       | ILWC29   | Wild                 | Turkey               | 0            | 0.001 | 0            | <b>0.998</b> | 0     | 0     |
| 83 |                                                          |                                                       | ILWC33   | Wild                 | Turkey               | 0            | 0     | 0            | <b>0.998</b> | 0     | 0     |
| 84 |                                                          |                                                       | ILWC49   | Wild                 | Syrian Arab Republic | 0            | 0     | 0.001        | <b>0.997</b> | 0     | 0.001 |
| 85 |                                                          |                                                       | ILWC226  | Wild                 | Turkey               | 0.001        | 0     | 0            | <b>0.998</b> | 0     | 0     |
| 86 | ILWC248                                                  |                                                       | Wild     | Turkey               | 0                    | 0.001        | 0.001 | <b>0.998</b> | 0            | 0.001 |       |
| 87 | ILWC249                                                  |                                                       | Wild     | Turkey               | 0                    | 0.009        | 0.001 | <b>0.99</b>  | 0            | 0     |       |
| 88 | ILWC236                                                  |                                                       | Wild     | Turkey               | 0.001                | 0.001        | 0     | <b>0.997</b> | 0            | 0.001 |       |
| 89 | ILWC225                                                  |                                                       | Wild     | Turkey               | 0                    | 0            | 0     | <b>0.998</b> | 0            | 0     |       |
| 90 | ILWC51                                                   |                                                       | Wild     | Turkey               | 0                    | 0            | 0     | <b>0.998</b> | 0            | 0.001 |       |
| 91 | ILWC250                                                  |                                                       | Wild     | Turkey               | 0                    | 0            | 0.001 | <b>0.998</b> | 0            | 0     |       |
| 92 | ILWC261                                                  |                                                       | Wild     | Syrian Arab Republic | 0                    | 0            | 0.003 | <b>0.985</b> | 0.008        | 0.003 |       |
| 93 | ILWC289                                                  |                                                       | Wild     | Turkey               | 0.001                | 0.001        | 0.001 | <b>0.996</b> | 0.001        | 0     |       |
| 94 | <b><i>C. microphyllum</i></b><br><b>(perennial wild)</b> | <i>microphyllum</i>                                   | Wild     | India                | 0.192                | 0.001        | 0.086 | 0.294        | <b>0.425</b> | 0.001 |       |

Yellow highlights indicate the maximum inferred ancestry coefficient of 94 *Cicer* accessions that led to their correspondence with one model-based population as determined by STRUCTURE
