# Supplementary material for: Natural Allelic Diversity, Genetic Structure and Linkage Disequilibrium Pattern in Wild Chickpea
Source: PubMed Central journal article supplement (PMC4164632; doi:10.1371/journal.pone.0107484), 2014-09-15
Supplement: pone.0107484.s009.pdf [file pone.0107484.s009.pdf]

**Table S2: Summary of 496 including 343 genic and 153 genomic microsatellite markers genotyped in 94 annual/perennial cultivated and wild *Cicer* accessions using gel-based assay and fluorescent dye labelled automated fragment analyser**

| Marker IDs* | Microsatellite repeat-motifs | Forward Primer sequences (5'-3') | Reverse Primer sequences (5'-3') | Actual annealing temperature (OC) | Size (bp) of alleles amplified | Types of markers | Chromosomes | Physical positions (bp) | Putative functions                                                                 |
|-------------|------------------------------|----------------------------------|----------------------------------|-----------------------------------|--------------------------------|------------------|-------------|-------------------------|------------------------------------------------------------------------------------|
| CaSSR1      | (TTA)5                       | CCTCGCCAAATAATCTCAGG             | CCGAAGAGCAGAGGAAGATG             | 60.1                              | 259                            | Genic            | Ca1         | 203295                  | Zinc finger C-x8-C-x5-C-x3-H type                                                  |
| CaSSR2      | (TTA)8                       | TGATGATTATTTGCTTTCCTC            | GCAACTAGAAAGACGCTGATAA           | 54.4                              | 152                            | Genic            | Ca1         | 203312                  | Zinc finger C-x8-C-x5-C-x3-H type family protein                                   |
| CaSSR3      | (TCT)7                       | ACGGTCAGTGAGCTGCTTCT             | TCCCAATCCTAGCTACCACG             | 60.1                              | 151                            | Genic            | Ca1         | 317669                  | Pseudouridine synthase family protein                                              |
| CaSSR4      | (TCTCAT)4                    | GGTGTACTGATTTCAATGTT             | AGGAGCATCTTCTTCACTTTC            | 54.4                              | 156                            | Genic            | Ca1         | 389097                  | TCP family transcription factor                                                    |
| CaSSR5      | (ATTCTC)5                    | CAACAACAACAACAAGAATCA            | GTTTGAAGAAGGTTGTTGGAT            | 54.7                              | 153                            | Genic            | Ca1         | 390435                  | TCP family transcription factor                                                    |
| CaSSR6      | (GA)11                       | TCAAAGAACCAAAATTCGAACA           | CGGTTGATTGATAATTCTCGTG           | 59.6                              | 153                            | Genomic          | Ca1         | 472339                  |                                                                                    |
| CaSSR7      | (CAT)5                       | AACCTCTTCTTTACACCTTGC            | GGGGATATGATCCAGCCTTT             | 60.1                              | 279                            | Genic            | Ca1         | 505905                  | KT2, a photosynthate- and light-dependent inward rectifying potassium channel      |
| CaSSR8      | (ATAAA)9                     | TGCTGCCAACAACTTAGCA              | GGCACCTTTCCTTGTACTGG             | 60.6                              | 202                            | Genomic          | Ca1         | 1145423                 |                                                                                    |
| CaSSR9      | (AT)8                        | GGCTGTGTTGGTTGTGTTG              | TTGCATGCTTTTACCAACC              | 58.7                              | 180                            | Genic            | Ca1         | 2046119                 | Putative secretory carrier membrane protein (SC3).                                 |
| CaSSR10     | (AAC)6                       | TGGGTTTGAGTTCTAAACAAG            | CATTTACAGCTTCTGATTGT             | 54.6                              | 151                            | Genic            | Ca1         | 2346126                 | Dof zinc finger protein adof2.                                                     |
| CaSSR11     | (GAG)6                       | GGAAGCAGAAACAGTAGAGGT            | TGTTCTTCTCCTCTTTAACCC            | 55.3                              | 165                            | Genic            | Ca1         | 2631745                 | zinc finger domain containing protein                                              |
| CaSSR12     | (TCT)6                       | GAAGCATCGTCTTCCCTGAG             | AATCGTTGGCGTTGTTTCTC             | 60.1                              | 192                            | Genic            | Ca1         | 2994601                 | RNA helicase family protein                                                        |
| CaSSR13     | (GGAAGT)3                    | ATAATGGTTACTTTCGGAGGA            | TCTTCTCGTGTTCATGTTCT             | 55.4                              | 151                            | Genic            | Ca1         | 3235738                 | sequence-specific DNA binding transcription factors                                |
| CaSSR14     | (AT)9                        | TTGAACCCCAAAATCTCAGC             | AAAGATGGTCCATAGTGAAGCAC          | 60.1                              | 237                            | Genomic          | Ca1         | 3688143                 |                                                                                    |
| CaSSR15     | (GA)18                       | GTTAGGGGCCAATTTGAAC              | GATGGCTTACGACCTTGTT              | 60.5                              | 210                            | Genomic          | Ca1         | 4097905                 |                                                                                    |
| CaSSR16     | (CTGATT)4                    | CGCAGATTATATCTCACGGTA            | CTATACCGTTTCAAATCCAAA            | 55.6                              | 148                            | Genic            | Ca1         | 4865629                 | BSD domain-containing protein                                                      |
| CaSSR17     | (TTG)4                       | AAAACAAGGAACCAAGAAG              | ATCTCCTCTATCATTGGTGGT            | 55.3                              | 126                            | Genic            | Ca1         | 5666044                 | nuclear coiled-coil protein related to the carrot peripheral nuclear protein NMCP1 |
| CaSSR18     | (TCT)6                       | TACCCAGATGAGATCTACGAA            | GGATGGTATCACTGTTTGTGT            | 54.9                              | 152                            | Genic            | Ca1         | 6750597                 | myb-like HTH transcriptional regulator family protein                              |
| CaSSR19     | (AT)14                       | CACATTTGTCATTTTGiAACAGCA         | TGAGTTGGGAGGGGAGACTA             | 60.0                              | 259                            | Genomic          | Ca1         | 8867063                 |                                                                                    |
| CaSSR20     | (ATG)5                       | AATTCAGGTCCTACAAAATCC            | GAGCAGTGTGCCTATGATATT            | 54.8                              | 151                            | Genic            | Ca1         | 9791574                 | Glabra 2, a homeodomain protein                                                    |
| CaSSR21     | (TCATGA)4                    | ATCATCATGAAGCATCCATAG            | TATCGGATATAGCTTTTGCAC            | 55.1                              | 156                            | Genic            | Ca1         | 10682877                | Involved in radial organization of the root and shoot axial organs                 |
| CaSSR22     | (TCATGA)4                    | ATCATCATGAAGCATCCATAG            | TATCGGATATAGCTTTTGCAC            | 55.1                              | 156                            | Genic            | Ca1         | 10682877                | Involved in radial organization of the root and shoot axial organs                 |
| CaSSR23     | (AATAA)4                     | CCTTTTGGGTTCTTATGATT             | ATTACACGAAGGATGAATTTG            | 55.0                              | 151                            | Genic            | Ca1         | 10893797                | putative transcription factor                                                      |
| CaSSR24     | (CAA)6                       | CCTTCACCTATCCCACTGGA             | TGGGCCAAAGTGATAAGAC              | 59.9                              | 249                            | Genic            | Ca1         | 11011602                | Protein kinase superfamily protein                                                 |
| CaSSR25     | (AT)11                       | AATCATAACCGATAACAAAACCTCAT       | TCATTAGACTCCAACAATTCATAGAC       | 57.3                              | 268                            | Genomic          | Ca1         | 11261320                |                                                                                    |
| CaSSR26     | (TAT)8                       | AGAAGAATCCAATCCA AAC             | GAAGCCTCTTCTCCTGATAC             | 55.0                              | 148                            | Genic            | Ca1         | 11285919                | GRAS family Protein, transcription factor                                          |
| CaSSR27     | (CAA)6                       | CCACCTGTACTATTCTTCA              | AAGGAGAATCAGAACCTTCCAC           | 55                                | 151                            | Genic            | Ca1         | 11897074                | DUF1635                                                                            |
| CaSSR28     | (GAT)6                       | ATGAGTCAAAGCCATAGTCAC            | TTCTTCTTCAGTTGGATGAAA            | 55                                | 153                            | Genic            | Ca1         | 11899747                | NAC                                                                                |
| CaSSR29     | (CTC)4                       | CTAAAGAATGGAATTGGGATT            | CTCGTTTGTGCTCTATTGT              | 55                                | 150                            | Genic            | Ca1         | 11902768                | SBP                                                                                |
| CaSSR30     | (AT)12                       | GTTGGTGCCAACATGCCTAT             | TGAACCGTGTTCaAAACCT              | 60.8                              | 163                            | Genomic          | Ca1         | 11960068                |                                                                                    |
| CaSSR31     | (CTT)9                       | TAAGTTGTGGCTGTGAGAGAT            | GCATGAAAATTCAGAGAGAAA            | 55.0                              | 157                            | Genic            | Ca1         | 12928971                | GLK1, Golden2-like 1                                                               |
| CaSSR32     | (GAA)9                       | TGAGGATTCAAATGTTAAGGGG           | TTCAGCAAGCAATGCAAAATC            | 60.0                              | 255                            | Genic            | Ca1         | 14140590                | Homeodomain-related                                                                |
| CaSSR33     | (AAC)5                       | TCCTTTTGGTGACACTACAAATACA        | AAAAAGAGACGCCAATTCACG            | 60.2                              | 277                            | Genic            | Ca1         | 15231892                | Eukaryotic aspartyl protease family protein                                        |
| CaSSR34     | (AAT)7                       | ACCTTATCAATGATTGCTTCA            | CAAGACAAAGAGGAAATTTGTG           | 54.9                              | 154                            | Genic            | Ca1         | 15378933                | putative transcription factor                                                      |
| CaSSR35     | (AG)10                       | GTTCCGAATTTGCGATCACT             | TTTGCCGTTTATGGTGATAA             | 60.1                              | 200                            | Genomic          | Ca1         | 16531210                |                                                                                    |
| CaSSR36     | (AG)13                       | GAACCTGACGAGGAAGTTGG             | ACATCTCCGAACTCGACCAC             | 60.1                              | 165                            | Genic            | Ca1         | 16618090                | putative TRAPP1I tethering factor                                                  |

|         |               |                          |                        |      |     |         |     |          |                                                                            |
|---------|---------------|--------------------------|------------------------|------|-----|---------|-----|----------|----------------------------------------------------------------------------|
| CaSSR37 | (TAA)7        | TGAGATAATGGAGCTTGAATC    | AGCTTGTGAAGTGACACAGT   | 54.5 | 152 | Genic   | Ca1 | 20106435 | basic helix-loop-helix (bHLH) DNA-binding superfamily protein              |
| CaSSR38 | (AAG)5        | TTTCTCACTTCAAAGACCCA     | ATTTGACGAACTCCAACGG    | 60.0 | 252 | Genic   | Ca1 | 21017902 | IQ-domain 22 (IQD22)                                                       |
| CaSSR39 | (ATC)5        | AAGACCAATCATCAAACCGAA    | AAGCTTGTGCAGGGAACACT   | 59.9 | 172 | Genic   | Ca1 | 21506732 | YABBY family of transcriptional regulators                                 |
| CaSSR40 | (CT)12        | GCGATCTCTCGAAAACCTA      | GAACGCAAACCACATGATTG   | 60.0 | 159 | Genic   | Ca1 | 21752019 | ENSANGP00000022085 related                                                 |
| CaSSR41 | (TA)12        | TGAGAGAGGAAAAaCaGATTGAGA | CACGGATCTTGTGAGTGACC   | 59.5 | 141 | Genomic | Ca1 | 30671033 |                                                                            |
| CaSSR42 | (TCT)10       | GCCATCTTCTACTTCCGCAC     | AATTCGAACTCACCACTCGG   | 60.1 | 231 | Genic   | Ca1 | 31527936 | putative protease SppA (SppA).                                             |
| CaSSR43 | (TC)7         | TGAGAACAAGACCAGAGTCAC    | GCATTGTCTTGAATCTCTC    | 55.3 | 144 | Genic   | Ca1 | 37689960 | Possible function in phloem development in the root                        |
| CaSSR44 | (CT)8         | CCTCTCAAACCATCCTCACA     | TCTCGAGCGATCCATCTTTT   | 59.9 | 201 | Genic   | Ca1 | 43729171 | Trypsin family protein                                                     |
| CaSSR45 | (GGA)7        | AGAGAAGAGAGAGGGTCCGG     | CGACTTCGAGTCCCGTCTTC   | 60.0 | 184 | Genic   | Ca1 | 43894448 | TT_ORF1, TT viral orf 1                                                    |
| CaSSR46 | (AC)6cct(C)15 | AAACGGATCAATGCGAGAAG     | CATTACATTGTCATTTGGCCC  | 60.2 | 279 | Genomic | Ca1 | 46935324 |                                                                            |
| CaSSR47 | (AT)8         | CTACCTTATGGGCACGCAAT     | AGCCAATTTGGTGTTgGAAG   | 60.0 | 265 | Genomic | Ca1 | 47131694 |                                                                            |
| CaSSR48 | (ATTTT)4      | AGGAATTAAGGTGATGAAAGC    | GTTTAAACAAGACGGACCAAT  | 55.2 | 164 | Genic   | Ca1 | 47290885 | BES1/BZR1 homolog 4 (BEH4)                                                 |
| CaSSR49 | (TAA)7        | CATGGAATTCGGTGCTACT      | GACGGTGAGCTGCATGAAA    | 59.9 | 112 | Genic   | Ca1 | 48129325 | TCP family transcription factor                                            |
| CaSSR50 | (GA)13        | ATGGAGGCGAATATATAGGAG    | TTTTAAGAAACAACCTGCGTTC | 55.1 | 151 | Genic   | Ca2 | 354109   | LOB domain-containing protein 41 (LBD41)                                   |
| CaSSR51 | (GAT)6        | GGAATTTTGGTGATGATTTTC    | CAACATATGAAGGAACACACA  | 56.0 | 149 | Genic   | Ca2 | 1133300  | WRKY Transcription Factor                                                  |
| CaSSR52 | (TTC)11       | GTCCCCGCAGTTACTGTTA      | GTAATTTGAAGCCGTCGT     | 60.0 | 218 | Genic   | Ca2 | 1588490  | Protein of unknown function (DUF3531)                                      |
| CaSSR53 | (AC)6(A)10    | TTGTTTCTCAAACCAACTACA    | TGCTTCCATAAGTTCTCCCC   | 57.3 | 119 | Genomic | Ca2 | 1754600  |                                                                            |
| CaSSR54 | (AG)11        | TGAGAAAAATTAGCACACAAAG   | ACATATTCATGCTGTTGTTCC  | 55.0 | 143 | Genic   | Ca2 | 2409848  | homeodomain leucine zipper class I (HD-Zip I) transcriptional activator    |
| CaSSR55 | (ATG)5        | TTGAAGTGGTGATGGTGAA      | GGGCACCTTATTAGCCCAT    | 60.2 | 169 | Genic   | Ca2 | 3226335  | Glutaredoxin family protein                                                |
| CaSSR56 | (TTAA)3       | CATCTATAAATGTGGCACAAG    | GATGGAGTGAAGTTTGAGATG  | 53.4 | 128 | Genic   | Ca2 | 3236381  | PRE1 (PACLOBUTRAZOL RESISTANCE1)                                           |
| CaSSR57 | (CACAAA)4     | GGAGGTTATAACAACCAAC      | GGCTTTGTTATGTTGAGGTT   | 53.7 | 150 | Genic   | Ca2 | 3451762  | Mitochondrial substrate carrier family protein                             |
| CaSSR58 | (TGT)5        | CAGGAACCAAGATTGCAAGA     | GGGAAAGAGTTCAAAACCCA   | 59.0 | 192 | Genic   | Ca2 | 3632977  | SPX domain gene 4 (SPX4)                                                   |
| CaSSR59 | (TCA)7        | CAACCAAAAAGACAAGAATGA    | GGCTCTTGATACCCTTACAAT  | 55.5 | 160 | Genic   | Ca2 | 4036035  | a chloroplast trans-acting factor of the psbD light-responsive promoter    |
| CaSSR60 | (TCA)7        | CAACCAAAAAGACAAGAATGA    | GGCTCTTGATACCCTTACAAT  | 55.5 | 160 | Genic   | Ca2 | 4036035  | a chloroplast trans-acting factor of the psbD light-responsive promoter    |
| CaSSR61 | (TGA)7        | GGCTCTTGATACCCTTACAAT    | CAACCAAAAAGACAAGAATGA  | 55.0 | 160 | Genic   | Ca2 | 4036194  | a chloroplast trans-acting factor of the psbD light-responsive promoter    |
| CaSSR62 | (TAA)15       | TAAATCCTCCTCCACACCG      | GGATGGACACATACATgGGG   | 59.9 | 169 | Genomic | Ca2 | 4037173  |                                                                            |
| CaSSR63 | (GA)14        | GCAAAAGACACATTTAGGGTTT   | GTAGGTGCAGGCCCTACCTT   | 57.4 | 270 | Genomic | Ca2 | 4570670  |                                                                            |
| CaSSR64 | (CCA)11       | ACATTGTTGGTCGTGTTTGC     | GGGTGATGTTGGAAGGATGA   | 60.7 | 259 | Genic   | Ca2 | 6404844  | Core-2/l-branching beta-1,6-N-acetylglucosaminyltransferase family protein |
| CaSSR65 | (TA)11        | GAACCCCTTcAACAAACGA      | CGAGCCTCGTAAAAATCCAAA  | 59.9 | 158 | Genomic | Ca2 | 6749922  |                                                                            |
| CaSSR66 | (AT)11        | CCCTTCACTTTCTCACATAAAGG  | AAGCCCTGTAACCTCCAGTCG  | 59.2 | 195 | Genomic | Ca2 | 8249226  |                                                                            |
| CaSSR67 | (CTT)8        | TCCTCCAACAACAACACCAA     | AGGAGGAACCTTTGAAACCC   | 59.4 | 218 | Genic   | Ca2 | 9985718  | Nucleic acid-binding proteins superfamily                                  |
| CaSSR68 | (TTC)6        | AATGCCTTCACGAATTTGG      | AGTTACTTCTCGGGGTTT     | 60.0 | 240 | Genic   | Ca2 | 10263909 | Expressed protein                                                          |
| CaSSR69 | (AG)12        | TTCCAGATCTCCGGTAGGTG     | ACTCTCCACTCTCCAACCA    | 59.7 | 209 | Genic   | Ca2 | 10330416 | A basic helix-loop-helix encoding gene (BIGPETAL, BPE)                     |
| CaSSR70 | (ATC)4        | AGCAAAATTCATGCTACAAAC    | TCCTAGTTCAATTCCTGATGA  | 54.8 | 151 | Genic   | Ca2 | 11661488 | homeodomain leucine zipper class I (HD-Zip I) protein.                     |
| CaSSR71 | (TC)10        | TGGATCCATTTGGTTtGGAT     | TTCTTCTCGTGCAGTCCGT    | 60.0 | 226 | Genomic | Ca2 | 12299937 |                                                                            |
| CaSSR72 | (GCA)4        | CTTTAATCATGCCAGCTCTAC    | TCCCTTTCTCTTCTCTTTTC   | 54.4 | 165 | Genic   | Ca2 | 14624000 | AL4, Alfin-Like family protein containing PhD domain                       |
| CaSSR73 | (TA)10        | TGGATGAGCCeTTCTTGAAC     | TGAAATTTAAATGGGTGCCA   | 60.2 | 182 | Genomic | Ca2 | 14846317 |                                                                            |
| CaSSR74 | (ATG)9        | CAGGCCTTGTTTGTGAGGT      | TTCTCCTCGATTTCAATGGG   | 60.0 | 206 | Genic   | Ca2 | 15235771 | ABI five binding protein (AFP1)                                            |
| CaSSR75 | (TG)7(TA)8    | TCGGAAAATTGAGAAAGTCTCA   | GCAATGCTCCCTAATTGA     | 60.2 | 276 | Genomic | Ca2 | 15920661 |                                                                            |

|          |               |                             |                            |      |     |         |     |          |                                                                                      |
|----------|---------------|-----------------------------|----------------------------|------|-----|---------|-----|----------|--------------------------------------------------------------------------------------|
| CaSSR76  | (AT)10        | TGACCATTTCATTAGTCTCAA       | GCCACCACACITTCATTTTT       | 59.6 | 246 | Genomic | Ca2 | 17520553 |                                                                                      |
| CaSSR77  | (CT)8ttc(T)10 | TCCGTTAATTTTGCTTGCT         | CGTGCACTCAAACCATGA         | 57.6 | 248 | Genomic | Ca2 | 18353310 |                                                                                      |
| CaSSR78  | (ACA)8        | CTCAAACTCCTCCACGAAGC        | TAAACACCCATCTTGTGCCA       | 60.0 | 270 | Genomic | Ca2 | 19292063 |                                                                                      |
| CaSSR79  | (TGA)4        | TGTCTCATCTGAAAAAGATTGA      | TTGGTTTCTTCATCAACAACT      | 55.1 | 150 | Genic   | Ca2 | 23951109 | auxin (indole-3-acetic acid) induced gene                                            |
| CaSSR80  | (TTA)7        | AAGATTTACCGCATCACATATCTC    | CCTCCTACCCACATTACCA        | 58.6 | 203 | Genomic | Ca2 | 25670979 |                                                                                      |
| CaSSR81  | (CAA)4        | AAAACAACAACCTTCAATGC        | TCTCCAATTGTAACCATCATC      | 54.6 | 155 | Genic   | Ca2 | 26834137 | plant WRKY transcription factor                                                      |
| CaSSR82  | (TC)12        | CATCTCTCTCACTCTCTTTCC       | AGATATGGGTAGCAAACGAAC      | 53.2 | 200 | Genic   | Ca2 | 27694606 | ERF (ethylene response factor) subfamily B-5 of ERF/AP2 transcription factor family  |
| CaSSR83  | (TGG)6        | TCTAGGCCTGGAAAAATGGTT       | TGATCCCATTTCTCTTTC         | 60.0 | 179 | Genic   | Ca2 | 27874806 | Expressed protein                                                                    |
| CaSSR84  | (TTC)5        | TCTTTGCTTTCACTCCCTC         | GGTGAAGCGGTTATTGAGA        | 60.1 | 227 | Genic   | Ca2 | 28230844 | Concanavalin A-like lectin Putative protein kinase                                   |
| CaSSR85  | (AT)16        | TTGTCACCATTATCTCCACTC       | CCAATATCTATTATCTTCACT      | 55.1 | 144 | Genic   | Ca2 | 29098865 | protein disulfide isomerase-like (PDIL) protein                                      |
| CaSSR86  | (TC)9         | AGCGATGAGAGCGAGTAAGC        | TCTCTCCCAATTCACCATC        | 59.9 | 278 | Genic   | Ca2 | 29913078 | protein affected traf#64257                                                          |
| CaSSR87  | (CAG)7        | TTGGTTAAGGATGTTCCCTCT       | CTACCATCTGCTCTTGTCTTA      | 55.5 | 154 | Genic   | Ca2 | 30868340 | CZF1                                                                                 |
| CaSSR88  | (TA)11        | AAAACGCAACACCACTCC          | GTGaAATAATTAGCTCTGTATACCAT | 60.0 | 237 | Genomic | Ca2 | 31798047 |                                                                                      |
| CaSSR89  | (CAT)5        | TGGAATGAaGAGATCcTCGC        | CAAGTGGCAGCAGAAGTTCA       | 60.3 | 165 | Genomic | Ca2 | 32013920 |                                                                                      |
| CaSSR90  | (GAA)11       | CAAGTGAATGAATTCTCAAGC       | CTCTCTTCTCTCATCTTCC        | 55.1 | 152 | Genic   | Ca2 | 32867739 | EIN3 (ethylene-insensitive3)                                                         |
| CaSSR91  | (GGT)4        | CATGAACAACATCATCAACAA       | CTCCACCACTACTGTACTCTG      | 55.3 | 148 | Genic   | Ca2 | 33605178 | SH1 gene family protein                                                              |
| CaSSR92  | (TG)11        | GGGGTAAAgATTTCTCCACA        | TCCATAATTGAGGATCTTG        | 60.2 | 225 | Genomic | Ca2 | 33722683 |                                                                                      |
| CaSSR93  | (CTT)5        | ACCATTTGGCATTGTTCCCTC       | GCGAAACCTGGAGTTCTTGT       | 59.3 | 266 | Genic   | Ca2 | 33745627 | CLAVATA1-related receptor kinase-like protein                                        |
| CaSSR94  | (GAT)10       | GCAACAAAAGAAAAGGCAGC        | TTCTTCTCTCTCTCTCTCC        | 60.0 | 195 | Genomic | Ca2 | 34684799 |                                                                                      |
| CaSSR95  | (GAA)5        | TTGAGCTGGAAGAAGGTCGT        | CACTCCTCACATCCAACCCCT      | 60.0 | 118 | Genic   | Ca2 | 35079352 | trigger factor type chaperone family protein                                         |
| CaSSR96  | (CCA)6        | ATTGATGACTCCGATTTCCGC       | ACCAGTTGTCTACCCCAAA        | 59.3 | 148 | Genic   | Ca2 | 35422305 | RNA-binding (RRM/RBD/RNP motifs) family protein                                      |
| CaSSR97  | (CT)6ca(CT)6  | AAAATGCACTTGTGTTTTGG        | GCAACTTGATGCGAATTGAC       | 57.7 | 279 | Genomic | Ca2 | 35431751 |                                                                                      |
| CaSSR98  | (TC)12        | GATGGTCTGTGAAATGTGC         | TCCGATTGAGATAAGGTCC        | 60.1 | 214 | Genomic | Ca2 | 35754585 |                                                                                      |
| CaSSR99  | (TTCATT)4     | AATGAGCTACTGCTGTCTTCA       | CCAGCAAAGTAAAGAACTCAA      | 55.4 | 157 | Genic   | Ca3 | 80260    | NAC domain transcription factor                                                      |
| CaSSR100 | (TTTGAG)4     | ATTCCACTTGTGCTGATAAA        | CTAAAAATGGAGGAGGAAGAG      | 55.0 | 151 | Genic   | Ca3 | 80320    | NAC domain transcription factor                                                      |
| CaSSR101 | (TTC)4        | ACGTTCAAGTATTGAACAAC        | AAGGAAACCACTTCACTCT        | 54.7 | 150 | Genic   | Ca3 | 81357    | NAC domain transcription factor                                                      |
| CaSSR102 | (AT)10        | TGAAGTAGGCTTGGTGGAT         | ATTTTTACCGACCGTTTTG        | 59.8 | 148 | Genomic | Ca3 | 925403   |                                                                                      |
| CaSSR103 | (AAT)6        | GGAGTTGGATTCTCTGGTGC        | AATGGAACAAGTGGCTTTGC       | 59.7 | 240 | Genomic | Ca3 | 2898679  |                                                                                      |
| CaSSR104 | (TC)14        | CGGCCATTGAAAACGAATAC        | TGGGTATTGGACTCCTTTCT       | 60.3 | 266 | Genomic | Ca3 | 3090422  |                                                                                      |
| CaSSR105 | (TAT)21       | TGCTCTATTTCGTTCCCTTTC       | TCCGTTAAGTTTCACTGCATTT     | 59.9 | 278 | Genomic | Ca3 | 3745505  |                                                                                      |
| CaSSR106 | (TTA)31       | TGTCATGCTTATTCCGACATCT      | TCTcCCACTCTGTTGCTTT        | 59.6 | 244 | Genomic | Ca3 | 4772252  |                                                                                      |
| CaSSR107 | (TGA)5        | TTGGAAGAAACACTGAATGAT       | CITTTTTCTCTGACGGTCATA      | 54.8 | 150 | Genic   | Ca3 | 7435046  | SMAD/FHA domain-containing protein                                                   |
| CaSSR108 | (AACAG)5      | AGAGAAGAAGTCCAACAATCC       | AGGTACAAGAAAGTGAACA        | 55.0 | 159 | Genic   | Ca3 | 10489944 | ACT-domain containing protein                                                        |
| CaSSR109 | (TTG)5        | GGGTCATTTTGTCCCTCAT         | AATTTTGTGCATGACCCTGA       | 59.0 | 143 | Genic   | Ca3 | 12394016 | Expressed protein                                                                    |
| CaSSR110 | (GA)9         | TGAGGGAGAGACACATGAa         | CGAAATTTTGTTCGAAG          | 59.8 | 212 | Genomic | Ca3 | 15320676 |                                                                                      |
| CaSSR111 | (TTA)7        | GAGGTTGGGTTGGTTTCTT         | CCATTGCGCTTCAATTTTGT       | 60.2 | 208 | Genomic | Ca3 | 16451987 |                                                                                      |
| CaSSR112 | (ATTCAT)6     | CCTTTCATTATCATTCAAC         | AGGATAAAGGTGAAGCAAATC      | 54.8 | 165 | Genic   | Ca3 | 16813885 | basic helix-loop-helix (bHLH) DNA-binding superfamily protein                        |
| CaSSR113 | (TTTA)8       | TGTGACATGATTTATGAATGACTTTTT | TTAGGGTTGTTCCAGTTGGC       | 60.1 | 207 | Genomic | Ca3 | 17876577 |                                                                                      |
| CaSSR114 | (CATCAC)3     | ACCATCATAACCATCATCATC       | GGAAACCTAGGTATTGTTGT       | 54.6 | 143 | Genic   | Ca3 | 20843695 | one of two Arabidopsis RAPTOR/KOG1 homologs                                          |
| CaSSR115 | (CAT)6        | CGTTTCCATTAGAGGAGAGAC       | ATGAAAGTGATGGTATAACG       | 55.6 | 162 | Genic   | Ca3 | 20843747 | one of two Arabidopsis RAPTOR/KOG1 homologs                                          |
| CaSSR116 | (TCC)5        | TCATCTGGGAAAAGGGAGTG        | AAGGACCTCATCAAACAGAA       | 60.0 | 195 | Genic   | Ca3 | 21366194 | WRKY Transcription Factor                                                            |
| CaSSR117 | (AAC)8        | ACACACTTCAAGAAAGTTCCA       | CTAAATCAGCAGCAGTAGGTG      | 54.9 | 150 | Genic   | Ca3 | 21774818 | novel family similar to DNA binding proteins containing basic-leucine zipper regions |
| CaSSR118 | (CTA)8        | TCCCGTAAAAGTGCACAAA         | CACCTGGAGAAGCTGAAATTG      | 59.9 | 277 | Genic   | Ca3 | 25631919 | Expressed protein                                                                    |

|           |            |                              |                           |      |     |         |     |          |                                                               |
|-----------|------------|------------------------------|---------------------------|------|-----|---------|-----|----------|---------------------------------------------------------------|
| CaSSR119  | (CAA)7     | TCTTACACCAAAACACAACA         | GAAGTGTGTTGTTCCATA        | 54.3 | 154 | Genic   | Ca3 | 25672196 | MYC-like bHLH transcriptional activator                       |
| CaSSR120  | (AATGAA)4  | AATAGTTCCAAAGGGTGAGAA        | CCTTCTGTTGGAATTGAACT      | 55.5 | 142 | Genic   | Ca3 | 26594189 | GATA transcription factor gene GNC                            |
| CaSSR121  | (ACA)7     | TTTCAGTGTGTTGGAAGACT         | TGACTCATTTTGGTTTTGTCT     | 54.9 | 146 | Genic   | Ca3 | 26594514 | GATA transcription factor gene GNC                            |
| CaSSR122  | (TGT)4     | TGAGTATCCCTTAATCACGAA        | TGCACAGTAAACAACACTCAG     | 54.9 | 146 | Genic   | Ca3 | 27041765 | BTB-POZ and MATH domain 4 (BPM4)                              |
| CaSSR123  | (AT)7      | CCAACCAATGAAAGCTAGGC         | TCCTATACCAATCCCCACA       | 60.0 | 134 | Genic   | Ca3 | 27694641 | PHLOEM INTERCALATED WITH XYLEM (PXY)                          |
| CaSSR124  | (CATCAC)3  | AGATTACTCATTACCGCATCA        | TCAAGCTATTGATCTTCTTGC     | 54.9 | 149 | Genic   | Ca3 | 28874001 | HLH, Helix-loop-helix DNA-binding domain                      |
| CaSSR125# | (TAA)5     | CGCATCTTCAATCCATCCT          | GGGCCCAACTCAAAGTTTC       | 60.8 | 159 | Genic   | Ca3 | 29594640 | ABC2_membrane, ABC-2 type transporter                         |
| CaSSR126  | (CT)11     | TGTCCCATCTTCTTCAATCA         | TTATTCATGGGGTTCAGC        | 59.8 | 241 | Genic   | Ca3 | 29681010 | NIMA-related serine/threonine Putative protein kinases (Neks) |
| CaSSR127  | (AT)16     | TTCACAAACAACACCACACAa        | TCACACGTGCACAGTTCCA       | 58.5 | 174 | Genomic | Ca3 | 30299506 |                                                               |
| CaSSR128  | (AG)6      | TGAACCAACAAGGAACCAT          | CCCCATGTCTAAAAGCAAC       | 60.5 | 223 | Genic   | Ca3 | 30690824 | Plant protein of unknown function (DUF868)                    |
| CaSSR129  | (TAT)6     | AGTGGTGAAGTATCCGTGG          | AAGGATGAAAAACAGAGGGTG     | 58.2 | 237 | Genic   | Ca3 | 30756503 | seed storage 2S albumin superfamily protein                   |
| CaSSR130  | (GA)10     | CCTCTGAAATGGGACTGTT          | AACACTTCCCCACACAAC        | 55.0 | 141 | Genic   | Ca3 | 31064037 | ERF (ethylene response factor)                                |
| CaSSR131  | (AAC)4     | TTATCATCCAATGATGAATCC        | ACTCCTCTAAACACCCTTTTG     | 54.8 | 155 | Genic   | Ca3 | 31248988 | ERF (ethylene response factor)                                |
| CaSSR132  | (TA)9      | TCGTTTGCACCTGTTTTAGCC        | TGTGACACTCATCGGTCAT       | 60.3 | 201 | Genomic | Ca3 | 32341145 |                                                               |
| CaSSR133  | (TA)10     | TCCTCCATTGCCTTTTCATC         | GCATATTTGGGACTAAGCATGT    | 60.0 | 229 | Genomic | Ca3 | 32408558 |                                                               |
| CaSSR135  | (CTT)7     | GCATCACAAGCTTCAACAGC         | TTTTGGGTTGATGGGTGATT      | 60.0 | 213 | Genic   | Ca3 | 32584632 | Chloroplast-targeted copper chaperone protein                 |
| CaSSR134  | (CTT)9     | GCATCACAAGCTTCAACAGC         | TTTTGGGTTGATGGGTGATT      | 59.6 | 213 | Genomic | Ca3 | 32584632 |                                                               |
| CaSSR136  | (AT)6(AG)7 | AGGCTATAAGAATGTCcaCCTTT      | AGAAATGCAAGCATCGTCAA      | 57.5 | 237 | Genomic | Ca3 | 34902234 |                                                               |
| CaSSR137  | (CTT)5     | ACATTCCATTCCCATTGAA          | ATTTGGAATCCATGGTGCTC      | 59.8 | 215 | Genic   | Ca3 | 35872876 | FASCICLIN-like arabinogalactan protein 16 precursor (FLA16)   |
| CaSSR138  | (AG)19     | ACCATTAACAGTCAACCATTG        | CAGATATGTTCTGCATTGAT      | 55.0 | 153 | Genic   | Ca3 | 36810456 | group-S bZIP transcription factor                             |
| CaSSR139  | (AAG)7     | GATATCTGGATCGGGTCTATT        | CATACCACACCATTTCATCT      | 54.7 | 144 | Genic   | Ca3 | 36944041 | Zinc knuckle (CCHC-type) family protein                       |
| CaSSR140  | (TCT)5     | TCCTAAATCTAATTCTATTTTCGCATAA | ATCGCAAATGAAACGGAGTC      | 60.1 | 248 | Genic   | Ca3 | 37063772 | RING/U-box superfamily protein                                |
| CaSSR141  | (AATTGT)4  | GGAACAACCTCAAGCTCAGTAA       | ATCCTTAGATCAGAGGAACCA     | 54.8 | 164 | Genic   | Ca3 | 37101948 | squamosa promoter-binding protein-like 12 (SPL12)             |
| CaSSR142  | (AGA)6     | CAGATTCCAACGTGCAGTG          | ATTGCAATGTGAACCCACAA      | 59.8 | 253 | Genic   | Ca3 | 37377922 | Pectinacetyltransferase family protein                        |
| CaSSR143  | (GAC)4     | TACATGTTTCAGCACAGCTAGA       | TCTTCTTCTTCTGCTCTTCT      | 54.7 | 150 | Genic   | Ca3 | 37789311 | ACT-domain containing protein                                 |
| CaSSR144  | (TA)9      | AGGGAAACTTGACCCTCCAT         | TGTTTGAAATTGCCACAAGC      | 59.8 | 191 | Genomic | Ca3 | 38027665 |                                                               |
| CaSSR145  | (GAT)6     | GAGCATATAAGCGACGTGA          | CCGCCAATCATATCCATTCT      | 59.7 | 140 | Genic   | Ca3 | 38354781 | protein similar to glutathione synthetases                    |
| CaSSR146  | (TAA)12    | AATACGCATCCAATCCATCC         | GTGTGGTGCTGCACAGAGTT      | 59.9 | 267 | Genic   | Ca3 | 38610591 | Rubredoxin-like superfamily protein                           |
| CaSSR147  | (GAA)7     | CAAAGTAAACCCCACCCTGTA        | ACCGCAATATGGAACACGAT      | 60.2 | 259 | Genic   | Ca3 | 38624905 | Expressed protein                                             |
| CaSSR148  | (TCA)8     | AACACTTGAACATTTCAAACC        | ATGGTGATGTTGTTACCAAAG     | 55.0 | 153 | Genic   | Ca3 | 38689024 | Duplicated homeodomain-like superfamily protein               |
| CaSSR149  | (ATT)5     | TCTCTCCCAAAAGGTCCC           | GAAGGTGGCCAAGAGATGAA      | 60.2 | 134 | Genic   | Ca3 | 38689689 | Duplicated homeodomain-like superfamily protein               |
| CaSSR150  | (ATC)7     | ACCGTCTCTAGGACGACCA          | TGAGTGAAGATGATGACGGC      | 59.8 | 216 | Genic   | Ca3 | 39398787 | WTF1                                                          |
| CaSSR151  | (AG)7      | GGTTTTGAGCGTGGTTTGAT         | TGCAAATGTGAAGCACAGA       | 59.0 | 146 | Genic   | Ca3 | 39618754 | Expressed protein                                             |
| CaSSR152  | (AG)9(GT)6 | TAGGTTTGTGTGTTGGGTCG         | CCCTcACTCAGCGGCTATC       | 59.5 | 142 | Genomic | Ca3 | 39804933 |                                                               |
| CaSSR153  | (GAA)5     | AGGAGGAGGTAGATATGATGG        | CAAGTCTGTTcAGTTCCCTA      | 54.8 | 156 | Genic   | Ca3 | 39817055 | NGATHA3 (NGA3)                                                |
| CaSSR154  | (TATCAA)4  | CCAAGTCTAACTCACACTCA         | TAGAAAGGAAGTGTGATGAGC     | 55.4 | 134 | Genic   | Ca3 | 39817471 | NGATHA3 (NGA3)                                                |
| CaSSR155  | (AAGA)6    | ACTTCAGTGTCTGTTGATTTG        | CCAACTAACAACCTGGAAAC      | 55.6 | 155 | Genic   | Ca3 | 39818017 | NGATHA3 (NGA3)                                                |
| CaSSR156  | (AT)14     | TGGAGAGGAATTGTTAcGTGG        | GCTTCCAATCAATAAAGTCTTACAA | 60.0 | 222 | Genomic | Ca3 | 39849058 |                                                               |
| CaSSR157  | (TCA)6     | CGCAACTTCTCCCTTTCATC         | TCATGGATTTCTTTGCTCT       | 60.0 | 248 | Genic   | Ca3 | 39872382 | endonuclease                                                  |
| CaSSR158  | (TTTA)7    | TTAGGCCCCACTCACTTTTT         | TGTTCAATTCGATCGGAAAC      | 59.9 | 243 | Genomic | Ca3 | 39872629 |                                                               |
| CaSSR159  | (CTT)17    | CCGAOCCAaATTTTCATTT          | TGCTGGAACGAACATTC AAC     | 59.7 | 174 | Genomic | Ca4 | 820341   |                                                               |

|          |           |                          |                         |      |     |         |     |          |                                                                                                          |
|----------|-----------|--------------------------|-------------------------|------|-----|---------|-----|----------|----------------------------------------------------------------------------------------------------------|
| CaSSR160 | (TTGG)3   | TTATGAAAAATGATGGGTTGTC   | AGACAACAGTGCCAACTAAG    | 55.0 | 156 | Genic   | Ca4 | 1103152  | NAC domain containing protein 74 (NAC074)                                                                |
| CaSSR161 | (CAA)5    | CGGTGATGAACCTGTTGTTG     | AAGCCACTCAAGACGCTGTT    | 60.1 | 234 | Genic   | Ca4 | 1206702  | 12S seed storage protein                                                                                 |
| CaSSR162 | (ATC)4    | CAAGAAGTTTCTTCCACTTCA    | CCAATCCATACTCTAACACCA   | 54.7 | 155 | Genic   | Ca4 | 1220485  | ERF (ethylene response factor)                                                                           |
| CaSSR163 | (TA)8     | TGTGCACATGACAATTAGAGCA   | TTTCCATCAAGAACACGTCG    | 60.3 | 221 | Genomic | Ca4 | 2543168  |                                                                                                          |
| CaSSR164 | (TTA)5    | AGATCCACCTCCACCTTGTC     | TTGGAGGTTGTTGTTGGGA     | 60.0 | 185 | Genic   | Ca4 | 2688512  | AT-hook motif nuclear-localized protein 20 (AHL20)                                                       |
| CaSSR165 | (AG)10    | GTTAGGGATTGTGCGGAGCA     | CAACGGTCACCTTTTTGGTT    | 60.1 | 217 | Genomic | Ca4 | 3603795  |                                                                                                          |
| CaSSR166 | (TA)8     | CCACCTCTCCCATCACTCA      | TCATGGAGAATCCAGATCC     | 59.8 | 271 | Genic   | Ca4 | 4594795  | AT-hook motif nuclear-localized protein 19 (AHL19)                                                       |
| CaSSR167 | (AG)6     | GGGCAGTGAGAGATGAGAGG     | CCTCACCCCTTTTACCCACAA   | 59.8 | 148 | Genic   | Ca4 | 4699818  | Nuclear protein that mediates light regulation of seedling development in a phytochrome-dependent manner |
| CaSSR168 | (GATTCA)6 | TGCAACTAGAGAAAGCTATGG    | TGCGTTTTCTTTAGTGCTTA    | 55.1 | 156 | Genic   | Ca4 | 4799223  | ATRX                                                                                                     |
| CaSSR169 | (GATTCA)6 | TGCAACTAGAGAAAGCTATGG    | TGCGTTTTCTTTAGTGCTTA    | 55.1 | 156 | Genic   | Ca4 | 4799223  | ATRX                                                                                                     |
| CaSSR170 | (AAT)4    | GAGAAAGAGGATATTGGGAGA    | CTAACTCCAACATTCTTGTC    | 55.0 | 151 | Genic   | Ca4 | 5080649  | Duplicated homeodomain-like superfamily protein                                                          |
| CaSSR171 | (ATA)10   | CGGTTTGTACTGAACCTGAA     | CTTTGTCCACCAATAAATCGTC  | 55.6 | 150 | Genic   | Ca4 | 5081312  | Duplicated homeodomain-like superfamily protein                                                          |
| CaSSR172 | (AAT)7    | GTAGTGCAGATAAATGCAAGG    | CAAGTTCAGTAACAACCGATA   | 55.2 | 141 | Genic   | Ca4 | 5081434  | Duplicated homeodomain-like superfamily protein                                                          |
| CaSSR173 | (CAA)4    | GACTATTCAATCCACTGGTCA    | TTGAAATCAGTTACCTTCTCG   | 55.1 | 159 | Genic   | Ca4 | 5571877  | UDP-Glycosyltransferase superfamily protein                                                              |
| CaSSR174 | (ATC)4    | AGATGATGATCACAAACATCC    | TTGAAGTGAAGGAGATGAAGA   | 54.8 | 142 | Genic   | Ca4 | 5736891  | indeterminate(ID)-domain 7 (IDD7)                                                                        |
| CaSSR175 | (AAC)4    | TCATGACCTCATATCAAACC     | AGTTGCAGCAGATAAATGAAG   | 55.0 | 160 | Genic   | Ca4 | 5736936  | indeterminate(ID)-domain 7 (IDD7)                                                                        |
| CaSSR176 | (ATG)8    | TCAAAGGGAAAGGATTTGG      | AGGGTCCCTCAGTATTGCCT    | 60.0 | 145 | Genic   | Ca4 | 6590103  | Major facilitator superfamily protein                                                                    |
| CaSSR177 | (CAA)7    | CGGTGTGAATTTGGTGATGA     | CAACAACAACCGAACGAGTG    | 60.2 | 253 | Genic   | Ca4 | 7315077  | Tetratricopeptide repeat (TPR)-like superfamily protein                                                  |
| CaSSR178 | (GAGAAA)4 | TGAAACTTCAGAGGTTGGTAA    | GCTTCTTGCTCTTGTGTTC     | 55.0 | 144 | Genic   | Ca4 | 7561185  | NAD(P)-binding Rossmann-fold superfamily protein                                                         |
| CaSSR179 | (TGG)8    | ATCCGGTAAATCAACATGAAT    | CAGAACCAGTTCTCATGTAA    | 55.9 | 157 | Genic   | Ca4 | 7970786  | Zinc finger C-x8-C-x5-C-x3-H type family protein                                                         |
| CaSSR180 | (ACCCT)5  | TTCTAAACGACATCTTCAAC     | CAGTTTCTTCCACAAAAGCTA   | 54.5 | 153 | Genic   | Ca4 | 8051984  | TLP family                                                                                               |
| CaSSR181 | (ATG)7    | GAAACTGAGCACTAGGAGTTG    | CTTCTCTGCTTTCATCTTCA    | 54.3 | 169 | Genic   | Ca4 | 8052130  | TLP family                                                                                               |
| CaSSR182 | (ATG)6    | TAAACAACCGGGAAGTTGG      | CCCTTACGAATCCCATTTT     | 60.0 | 137 | Genic   | Ca4 | 8052218  | TLP family                                                                                               |
| CaSSR183 | (GA)9     | GAATCAGAAGTGGTTGGGA      | TTCGTGCCAGAAACAGTGAG    | 60.0 | 155 | Genic   | Ca4 | 9314839  | protein with a DWD motif                                                                                 |
| CaSSR184 | (TA)8     | TGCATCTCGCCTTGAATATG     | CCACACATGCCCTACTCTT     | 60.0 | 214 | Genic   | Ca4 | 11051159 | NAC domain containing protein 16 (NAC016)                                                                |
| CaSSR185 | (GAT)4    | AGGTTTCAAGAAAAGTGGAC     | GAGGATCAATAACAGCATTG    | 55.1 | 147 | Genic   | Ca4 | 11053035 | NAC domain containing protein 16 (NAC016)                                                                |
| CaSSR186 | (ACC)5    | ACTATTATGCCCCACTGAAG     | GCAGAGACGAAGAAGATGATA   | 54.5 | 138 | Genic   | Ca4 | 11573408 | Duplicated homeodomain-like superfamily protein                                                          |
| CaSSR187 | (GAA)7    | TGCTGGTCTTGTAGCTGGTG     | GCAGCTTGTAAGGGTTTGG     | 59.7 | 168 | Genic   | Ca4 | 11658503 | Vacuolar iron transporter (VIT) family protein                                                           |
| CaSSR188 | (CTCATC)4 | CCACTAATAACAAGGAAGCAAA   | AGTCGCTCTTATTGGACTTGT   | 54.8 | 156 | Genic   | Ca4 | 12023919 | Leucine-rich repeat protein kinase family protein                                                        |
| CaSSR189 | (CTCATC)4 | CATTCTCAAATTCAAACCAC     | TGGAAAAAGAAAGACAATGAC   | 54.8 | 136 | Genic   | Ca4 | 12023936 | Leucine-rich repeat protein kinase family protein                                                        |
| CaSSR190 | (AAC)7    | CCCAAAACATCAACAATCTTA    | CCTGTTGGAAAATTTCTAGGTT  | 55.3 | 132 | Genic   | Ca4 | 12176090 | SCARECROW-like 8 (SCL8)                                                                                  |
| CaSSR191 | (TCA)4    | CTAACTGAACACCAGCACTA     | AGAAGGAGAGGTGATAGGTTG   | 55.6 | 146 | Genic   | Ca4 | 13843207 | LUH   WD-40 repeat family protein                                                                        |
| CaSSR192 | (AG)9     | AAAATTGGATTGGGAAAGGG     | TTTGTACCAAAACCAACCC     | 59.8 | 131 | Genic   | Ca4 | 14340497 | tubulin alpha-6 chain                                                                                    |
| CaSSR193 | (AT)13    | GGGATGCATCTGCAAAATTTA    | TGAGTCCAATAAAACCCCA     | 59.9 | 249 | Genomic | Ca4 | 15398881 |                                                                                                          |
| CaSSR194 | (AT)8     | AACACCCACATAATGACCC      | TCATTTGACATTACCTCAGTTTT | 59.9 | 222 | Genic   | Ca4 | 16478585 | Expressed protein                                                                                        |
| CaSSR195 | (ACTTGC)4 | TGAACTCGTATCTTCTGCTTC    | ATCATGCTTCACAACCTTCATC  | 54.8 | 172 | Genic   | Ca4 | 16650296 | ovate family protein 13 (OPF13)                                                                          |
| CaSSR196 | (ACTTGC)4 | TGAACTCGTATCTTCTGCTTC    | ATCATGCTTCACAACCTTCATC  | 54.8 | 172 | Genic   | Ca4 | 16650296 | ovate family protein 13 (OPF13)                                                                          |
| CaSSR197 | (TC)13    | CGTCGTGCAGATCTTCGATA     | GCGACGCTACTGTAACCCT     | 60.0 | 248 | Genomic | Ca4 | 16665218 |                                                                                                          |
| CaSSR198 | (AT)14    | CAATTTCTCTCTATTGTTTTGACA | TGATTCTCGAGGATGCGAC     | 60.6 | 250 | Genomic | Ca4 | 17043109 |                                                                                                          |

|          |          |                          |                           |      |     |         |     |          |                                                                                  |
|----------|----------|--------------------------|---------------------------|------|-----|---------|-----|----------|----------------------------------------------------------------------------------|
| CaSSR199 | (CCA)6   | CCAACTAGGCAAAAGCTTCG     | GTTTGACAGTTTGAGCTTCC      | 59.9 | 273 | Genic   | Ca4 | 17663778 | RING-H2 protein that interacts with the RING finger domain of COP1               |
| CaSSR200 | (AT)9    | AACTGAGAATGACTTGCCCTTCA  | TTTAGGGATGATTGCTTGGG      | 59.0 | 228 | Genomic | Ca4 | 17704840 |                                                                                  |
| CaSSR201 | (ATT)8   | TCTTTGAGACTGTTTTCCCTTT   | CATGTCTCATATTCCTCTAGCTGC  | 58.5 | 115 | Genomic | Ca4 | 19856773 |                                                                                  |
| CaSSR202 | (ATTCT)4 | GGGTCATCATCAAACCA        | AGTTCTGAAGTCATGGTAGGG     | 54.9 | 147 | Genic   | Ca4 | 20436604 | TCP family transcription factor                                                  |
| CaSSR203 | (TTG)9   | CAGGAGTTGAAACTGAAACAC    | TCCACAACAACAACAACAGTA     | 54.9 | 155 | Genic   | Ca4 | 22196748 | embryo sac development arrest 31 (EDA31)                                         |
| CaSSR204 | (TA)10   | AACCCATCATTITGGCCATGT    | CCTGGAAAACCTGCAACTGG      | 60.1 | 155 | Genomic | Ca4 | 22226606 |                                                                                  |
| CaSSR205 | (TA)10   | GGGGATTGTCAGAAACGGTA     | TTGTCGACACATCCTCTCAAA     | 59.8 | 223 | Genomic | Ca4 | 26366347 |                                                                                  |
| CaSSR206 | (TCA)6   | ACCACCACTGCCTCTTGTTC     | CTCCAACAACCTCCACAGTT      | 60.0 | 149 | Genic   | Ca4 | 26873093 | Expressed protein                                                                |
| CaSSR207 | (AG)13   | CACAATCATCATCGAGCACC     | ACACACTCCTCACCGTTCT       | 60.1 | 222 | Genomic | Ca4 | 27187560 |                                                                                  |
| CaSSR208 | (AG)7    | TCCACACAGACATGTTTCATC    | CCTCATGGAAGGCAACCTTA      | 60.1 | 207 | Genic   | Ca4 | 28594218 | AT-hook motif nuclear-localized protein 20 (AHL20)                               |
| CaSSR209 | (CAG)6   | TGGCATCATCATCACTGTCTT    | CCATCCTTTTCAATGCGAGT      | 60.1 | 253 | Genic   | Ca4 | 30414975 | cobalt ion binding                                                               |
| CaSSR210 | (AT)9    | TGTGAACCTTTTCATTTGGCTTG  | CCATTCGATCATGGGTAGTAGTT   | 60.1 | 205 | Genomic | Ca4 | 30455676 |                                                                                  |
| CaSSR211 | (AAT)7   | CCCCACAACCTCAAAGTAAG     | GCTGCATTTTCACCGTACAA      | 58.6 | 265 | Genomic | Ca4 | 32335239 |                                                                                  |
| CaSSR212 | (ATGGT)3 | TCCCATCAAGATGCTAAAATA    | AATCAATCTTTGAGTTGTTGC     | 55.0 | 149 | Genic   | Ca4 | 32780320 | SHY2/IAA3 regulates multiple auxin responses in roots                            |
| CaSSR213 | (CAA)5   | AAACAACCTAACGCCGTAACCTA  | TTGGCATACTGATTCTTCTTC     | 54.5 | 153 | Genic   | Ca4 | 35416175 | TCP family transcription factor                                                  |
| CaSSR214 | (CCATT)4 | TTCATTAGCTTGAAGCACTC     | GGTTGAGGAGAAAATTAAGC      | 55.0 | 150 | Genic   | Ca4 | 35417258 | TCP family transcription factor                                                  |
| CaSSR215 | (TCC)5   | AAACACAGATGTCGTCGCAA     | CCTGATATTCGGCAACACG       | 60.1 | 156 | Genic   | Ca4 | 36155130 | Plant protein of unknown function (DUF827)                                       |
| CaSSR216 | (CAC)6   | CGTCGTTCCATACCAAACG      | CCAGAAGGAGATCCTGAACG      | 59.8 | 207 | Genic   | Ca4 | 36842702 | Putative plant-specific transcriptional regulator                                |
| CaSSR217 | (CAC)8   | CTAAAGAATGGAATTGGGATT    | CTCGTTTGTGTTGCTCTATTGT    | 55.0 | 153 | Genic   | Ca4 | 36842734 | Putative plant-specific transcriptional regulator                                |
| CaSSR218 | (GAT)4   | TGAAGTTGAGAGGTTAATTGG    | TCATCACACATAGAGCCTTTT     | 54.6 | 151 | Genic   | Ca4 | 36952282 | indeterminate(ID)-domain 5 (IDD5)                                                |
| CaSSR219 | (TA)13   | CTTCAACCCACCAOGCTACT     | CTCACTTCTCCGCTCTCTGC      | 60.2 | 271 | Genomic | Ca4 | 38376225 |                                                                                  |
| CaSSR220 | (ATAA)7  | TCTCCTTCCCTCTAGTAATTTGTG | TTTGTTTTAAATTTGCACTTCAACA | 59.3 | 272 | Genomic | Ca4 | 39006837 |                                                                                  |
| CaSSR221 | (TA)9    | CATTCCACCTTAAACTCCTCG    | CCGTCTAACTAAGATGAACCTG    | 60.0 | 199 | Genomic | Ca4 | 39226042 |                                                                                  |
| CaSSR222 | (TA)6    | ATAGCAGCAAACTCTCAGCG     | GCTCATTGAAGATGACATTGC     | 58.3 | 273 | Genic   | Ca4 | 39805351 | putative c-myb-like transcription factor                                         |
| CaSSR223 | (TC)9    | TGTATGTAGGCTTGGGGAGG     | ATCCAGATGATGCCCTACA       | 59.9 | 170 | Genomic | Ca4 | 40276977 |                                                                                  |
| CaSSR224 | (CT)7    | CCTCAAGTGCAACAAAACAA     | TGCAACATTTTACACCAGA       | 60.1 | 124 | Genic   | Ca4 | 40670097 | CCT motif family protein                                                         |
| CaSSR225 | (CAG)5   | TGCAACAGATGTTGTTACAGA    | GAGATGAGCCTATCCCTAC       | 55.3 | 170 | Genic   | Ca4 | 41865067 | LEUNIG                                                                           |
| CaSSR226 | (CAG)4   | AATTAAGGCTAGGGAACAACA    | CATGCCTCTGTAACAACATCT     | 55.7 | 143 | Genic   | Ca4 | 41865183 | LEUNIG                                                                           |
| CaSSR227 | (TA)12   | ATGCCATTCTTGCTGATT       | TCAAATGCAGCAACAACAAA      | 59.5 | 269 | Genomic | Ca4 | 42025608 |                                                                                  |
| CaSSR228 | (ACA)4   | GTTTGGATGCATAACAACAAG    | CTCAGATTATATCAGCTTT       | 55.8 | 153 | Genic   | Ca4 | 43462315 | homeobox protein 34 (HB34)                                                       |
| CaSSR229 | (GAA)5   | GAAAGAAGATCACAAGCCTTT    | CAAAGGTATCTTGAGTGGTTG     | 55.3 | 155 | Genic   | Ca4 | 43513782 | basic helix-loop helix transcription factor involved in tapetal cell development |
| CaSSR230 | (GAA)8   | TAGTTGCTGCCTTCGGAAC      | GGCGGATACTACTTTGTCGC      | 59.7 | 200 | Genic   | Ca4 | 43715230 | Ubiquitin-like superfamily protein                                               |
| CaSSR231 | (AATTA)4 | AATGAATTGGTTTGTCTGTG     | CTTACTCACCCGATCCTAACT     | 55.2 | 148 | Genic   | Ca4 | 43891008 | A class II knotted1-like homeobox gene family                                    |
| CaSSR232 | (AGA)8   | GTTTATGGTGTGAAGTTGA      | TACTCTACGCTTCTCCCTCT      | 55.2 | 149 | Genic   | Ca4 | 43891170 | A class II knotted1-like homeobox gene family                                    |
| CaSSR233 | (AT)10   | GTAAGCCAACCTCTTGCCA      | AACCCACAACCACTTCCATC      | 60.2 | 196 | Genomic | Ca4 | 44581810 |                                                                                  |
| CaSSR234 | (ATG)5   | AATGTTTCAATTTCAATGGGA    | GGATCGGTTATCGACTGAGG      | 59.5 | 189 | Genic   | Ca4 | 44625382 | Expressed protein                                                                |
| CaSSR235 | (AG)10   | GGACACACAACAGAGAAAA      | ACGAGATTGTAAGGAGTACC      | 55.3 | 167 | Genic   | Ca4 | 44660343 | AL4 the Alfin-Like family of nuclear-localized PhD domain                        |
| CaSSR236 | (CAT)6   | TCGCATAGAAGATGTCGTCG     | ACGCTACTCGATGACGAGGT      | 59.9 | 152 | Genic   | Ca4 | 45074489 | protein containing N-terminal tripartite nucleotide binding site                 |
| CaSSR237 | (ATTT)9  | GCTTCAGAATTCGACGTGGT     | TACATTGGGCTGGTACATGG      | 60.3 | 105 | Genomic | Ca4 | 45108920 |                                                                                  |
| CaSSR238 | (TGAA)3  | ATGAGGAAATTCGAAACAT      | AAGGAACTGTCTGTGAAA        | 55.2 | 150 | Genic   | Ca4 | 45186457 | transcription factor involved in photomorphogenesis                              |
| CaSSR239 | (TAT)12  | GGGTGTGGATAGCAATGGTT     | AGCTCAATTGCCAGGAAGAA      | 60.0 | 274 | Genic   | Ca4 | 45445913 | Putative homolog of the Blind gene in tomato                                     |

|           |            |                          |                             |      |     |         |     |          |                                                                                 |
|-----------|------------|--------------------------|-----------------------------|------|-----|---------|-----|----------|---------------------------------------------------------------------------------|
| CaSSR240  | (GTA)5     | GGCGGAATAATTGAAGTAGTAG   | GTTGTCGATCAAAGTATTGC        | 55.0 | 158 | Genic   | Ca4 | 45595013 | Growth regulating factor, transcription activator                               |
| CaSSR241  | (GT)7      | TTTTGTTAGCGTTTGTGTTTGG   | CATAAAACCGCCTGCAACTT        | 60.1 | 203 | Genic   | Ca4 | 46259055 | F-box protein                                                                   |
| CaSSR242  | (TC)10     | CGTAACCGAGGAGTTTGAA      | AAGGGCGTTGAAAGAAAGAA        | 58.9 | 217 | Genic   | Ca4 | 46269177 | Mannose-P-dolichol utilization defect 1 protein                                 |
| CaSSR243  | (AGATGA)3  | CGATGAATCAAGAAGCAATA     | TGAACCTAACCAATTCTTGA        | 55.7 | 159 | Genic   | Ca4 | 46398833 | DREB subfamily A-5 of ERF/AP2 transcription factor family (RAP2.1)              |
| CaSSR244  | (AG)10     | AATCAGAAGCGGAGTGGTTG     | AATGGAGGCGGGAGAGTAAT        | 60.3 | 266 | Genomic | Ca4 | 46457612 |                                                                                 |
| CaSSR245  | (TTA)21    | ACAGAGCCACCAGGATTGTT     | GAAACTGGCCAGACGTTTT         | 59.6 | 225 | Genomic | Ca4 | 46788418 |                                                                                 |
| CaSSR246  | (CT)7(AT)7 | ATCTCGCCAATAACCACCAC     | GGTAGCTAGTTGATCAAGTTCTTTCTT | 59.8 | 197 | Genomic | Ca4 | 47266711 |                                                                                 |
| CaSSR247  | (GAA)7     | TGACATCTCCAACAACAAGAT    | CACACTGTGGATTCTTGTCTC       | 55.6 | 147 | Genic   | Ca4 | 48124978 | BEL1-like homeodomain 7 (BLH7)                                                  |
| CaSSR248  | (ATA)6     | GGCTATGCCAACATTCCTGT     | TGAAGTAGGCCAATGCAACA        | 60.3 | 248 | Genic   | Ca4 | 48145725 | cytosolic thioredoxin                                                           |
| CaSSR249  | (TAAA)5    | AAAGCATGCACTAATCACAGT    | CAAGTCTTTGTCATCTTTGCT       | 55.1 | 139 | Genic   | Ca4 | 48319615 | Basic-leucine zipper (bZIP) transcription factor family protein                 |
| CaSSR250  | (TC)9(T)10 | TTACATGAAAAATAAAaCAAGCAA | CCGGAAGATTTAGCAATGGA        | 57.3 | 199 | Genomic | Ca4 | 48825962 |                                                                                 |
| CaSSR251  | (GAT)6     | ATGAGTCAAAGCCATAGTCAC    | TTCTTCTTCAGTTGGATGAAA       | 54.4 | 153 | Genic   | Ca5 | 164592   | LONG VEGETATIVE PHASE 1 (LOV1)                                                  |
| CaSSR252  | (TCCC)3    | CGAGTATACAAGAGAGCAGGA    | AGCTGCCTTATTAGAGTGTC        | 54.9 | 147 | Genic   | Ca5 | 166052   | LONG VEGETATIVE PHASE 1 (LOV1)                                                  |
| CaSSR253  | (CAA)5     | TGACAACAGTTCTTGGTCTTT    | GGGAGAGGGAGTAACAAAGTA       | 54.9 | 154 | Genic   | Ca5 | 166287   | LONG VEGETATIVE PHASE 1 (LOV1)                                                  |
| CaSSR254# | (AATCCA)5  | ATTCAGCAGTTAGTTCCAACA    | GCATCAGCAAAGTAGACAAAT       | 55.1 | 147 | Genic   | Ca5 | 166458   | LONG VEGETATIVE PHASE 1 (LOV1)                                                  |
| CaSSR255  | (CTTTG)5   | AATGGAGAAAAAGCAGAAGAC    | GCGTAAACTAGATGGCTGATA       | 55.3 | 144 | Genic   | Ca5 | 222915   | homeobox protein 31 (HB31)                                                      |
| CaSSR256  | (TA)11     | ATTGGGAATTCAGCGTTTCC     | ACTGAGAATTGGGGTCgTTG        | 61.2 | 280 | Genomic | Ca5 | 7247789  |                                                                                 |
| CaSSR257  | (ATTA)3    | AACATGATGGAAGATGGAAC     | TGGTCACTTGGGCTAATG          | 54.8 | 147 | Genic   | Ca5 | 7675104  | a MADS box transcription factor expressed in the carpel and ovules              |
| CaSSR258  | (CT)15     | TCTGCCTCGTACTCCTCACA     | GGTTGTTGCTGGCATTTTCT        | 59.6 | 247 | Genomic | Ca5 | 8866821  |                                                                                 |
| CaSSR259  | (TGT)4     | TTGTTGATGTTGATGTTGCT     | CCTATCAACCTATCGAACCTT       | 55.0 | 144 | Genic   | Ca5 | 9961600  | WRKY transcription factor 2                                                     |
| CaSSR260  | (TGC)5     | ATTGATGATGAACCATTATGC    | ACAACAACAACATCAACAACA       | 54.9 | 144 | Genic   | Ca5 | 9961692  | WRKY transcription factor 2                                                     |
| CaSSR261  | (ATA)6     | TCGTCATAGTTTCAAGCGGT     | CAGGAGGTGCACTATCAGCA        | 60.0 | 149 | Genic   | Ca5 | 9989246  | chloride channel protein                                                        |
| CaSSR262  | (TTC)9     | TGCTATTGTGATTCAGTTCT     | AGCATGACAAGTTTAAAAGCA       | 55.0 | 147 | Genic   | Ca5 | 10080588 | myb family transcription factor                                                 |
| CaSSR263  | (AG)16     | CAGAAAACAACCAAAACCGA     | TGCTCATGATTTCAACCTC         | 60.0 | 191 | Genomic | Ca5 | 10184550 |                                                                                 |
| CaSSR264  | (CTT)7     | TCCAAAACACATTCACAAGCA    | TATGGATCGGAAGACGAACC        | 60.1 | 245 | Genomic | Ca5 | 11065299 |                                                                                 |
| CaSSR265  | (CTT)6     | CCAAAACCATTTTCTTCAATC    | TATGGATCGGAAGACGAACC        | 59.9 | 191 | Genic   | Ca5 | 11065353 | Plant invertase/pectin methyltransferase inhibitor superfamily                  |
| CaSSR266  | (AG)14     | CGAATAAATTTGCGGAGAA      | AAGCATCCAATTTGGCAAAG        | 60.0 | 275 | Genomic | Ca5 | 12476511 |                                                                                 |
| CaSSR267  | (GT)9(AT)6 | AAGACATTATGAAATGCAACAAA  | TGAGAGATGCATTCAACATTATAGG   | 59.8 | 250 | Genomic | Ca5 | 12592203 |                                                                                 |
| CaSSR268  | (AAT)10    | TGATTTCTCCATCTATCGGG     | ATTAGCGCCTTACGACATCC        | 59.0 | 259 | Genomic | Ca5 | 14185310 |                                                                                 |
| CaSSR269  | (ATT)8     | AAAaGAACAAAATGGAAGCCC    | TGGATGCAAAAGATTTGAGC        | 59.5 | 266 | Genomic | Ca5 | 15878709 |                                                                                 |
| CaSSR270  | (AT)10     | TCAGTCCATATTAATCATCAATTC | AGTGATAACCGTTGGAAAAGC       | 59.2 | 280 | Genomic | Ca5 | 17120195 |                                                                                 |
| CaSSR271  | (CAC)4     | CTTATGACATGAGGAAGCAAC    | ATTTCTCTCACAATCAAATGG       | 55.0 | 150 | Genic   | Ca5 | 19048743 | Acyl-CoA N-acyltransferases (NAT) superfamily protein                           |
| CaSSR272  | (TCA)4     | CAAGATTATCATTTGGACGAC    | AAATGGTGCTAATTTGGATCT       | 54.7 | 150 | Genic   | Ca5 | 21386676 | Pseudo response regulator involved in the generation of circadian rhythms, TOC1 |
| CaSSR273# | (AT)10     | CCTTTATAAAAaGAGTGGGgT    | GTGGGTTGCAAGGAAGATTG        | 57.7 | 201 | Genomic | Ca5 | 23012241 |                                                                                 |
| CaSSR274  | (AT)12     | TGCTTAAAGAATTTGAAACGATGA | CATTAGCCTCGTTGGCATTT        | 60.1 | 210 | Genomic | Ca5 | 23438498 |                                                                                 |
| CaSSR275  | (AG)13     | TACAAAAGAATCAAAACCAAG    | TTTCTTCCACAATTTCTGTTA       | 54.6 | 165 | Genic   | Ca5 | 23874393 | BTB/POZ domain-containing protein                                               |
| CaSSR276  | (AAT)7     | TCCACTTACCACATCATCA      | TGCATATTTTGACCTGCAT         | 59.0 | 209 | Genic   | Ca5 | 24717518 | Homeodomain-like transcriptional regulator                                      |
| CaSSR277  | (AT)10     | AACCGTTCACAGTAGAGGCA     | CCCTATGTCCAAAGCTACG         | 58.4 | 147 | Genomic | Ca5 | 26329409 |                                                                                 |
| CaSSR278  | (GAT)7     | TGAGGGTACTCCTAAACCCG     | CCCCCTTCTTTCTTCAAC          | 59.0 | 180 | Genomic | Ca5 | 26833175 |                                                                                 |
| CaSSR279  | (GAAA)3    | AGCTATGCCTCCTGATAAACT    | GAGTAGTGGCTTCTGTTTGAA       | 55.0 | 167 | Genic   | Ca5 | 27118508 | basic leucine-zipper 52 (bZIP52)                                                |
| CaSSR280  | (CCT)4     | AAGTAAACCCACAGAGTTCT     | TATGAAGCTTTCAACATCAGG       | 55.5 | 144 | Genic   | Ca5 | 27757413 | auxin response factor family protein                                            |
| CaSSR281  | (AAT)8     | GCACATAGCAGTTACATATGGCAG | TACTTTTGACCTCGGTTCC         | 60.9 | 265 | Genomic | Ca5 | 28955959 |                                                                                 |

|          |            |                           |                           |      |     |         |     |          |                                                                            |
|----------|------------|---------------------------|---------------------------|------|-----|---------|-----|----------|----------------------------------------------------------------------------|
| CaSSR282 | (AT)7      | CACAGCAACAGAACTGGCAT      | TTTCATGGCACAAGAAGTTGC     | 59.8 | 267 | Genic   | Ca5 | 29319100 | protein, expressed in leaves, with similarity to pollen allergens.         |
| CaSSR283 | (CCTTCT)3  | AGTTCTTCCACAAATCAACC      | CCAAGAACAGACAAGAAGAA      | 55.8 | 152 | Genic   | Ca5 | 29398059 | DREB subfamily A-6 of ERF/AP2 transcription factor family (RAP2.4)         |
| CaSSR284 | (CTT)5     | TTCTCTTCCATCAATGACTT      | GCGAAAAGTTGGTTGAAAA       | 60.1 | 155 | Genic   | Ca5 | 29465178 | Contains a weak similarity to ELG protein from Homo sapiens                |
| CaSSR285 | (TCTTGC)3  | TCITTTATCTTCTGCAAAACCA    | CAAGAGCAAGAACAAGAAGAG     | 55.3 | 149 | Genic   | Ca5 | 30587088 | nucleic acid binding                                                       |
| CaSSR286 | (CTTCTC)4  | TTTCATCGTCTACTTGATGGT     | TTGATGGTAGAGCAAGAACAT     | 54.8 | 157 | Genic   | Ca5 | 30587245 | nucleic acid binding                                                       |
| CaSSR287 | (CTTCTC)4  | TTTCATCGTCTACTTGATGGT     | TTGATGGTAGAGCAAGAACAT     | 54.8 | 157 | Genic   | Ca5 | 30587245 | nucleic acid binding                                                       |
| CaSSR288 | (TTCTCC)3  | TTTCATCGTCTACTTGATGGT     | TTGATGGTAGAGCAAGAACAT     | 54.8 | 157 | Genic   | Ca5 | 30587245 | nucleic acid binding                                                       |
| CaSSR289 | (TAT)7     | ACGCCTTCTTTGCTCCTTTT      | AGTCAAGCCTCACTCCGAGA      | 60.4 | 250 | Genomic | Ca5 | 31109261 |                                                                            |
| CaSSR290 | (TTC)5     | ATGAAATTGCTCGTGGAGG       | GGGATTGATTGCTGGGAAGA      | 59.9 | 258 | Genic   | Ca5 | 31182241 | Calcium-binding EF hand family protein                                     |
| CaSSR291 | (ATG)6     | CATGAAGGCCTATAACAAGAA     | GAGCTTCTACTCGTCATCATC     | 54.7 | 145 | Genic   | Ca5 | 31194921 | HMGB (high mobility group B) protein                                       |
| CaSSR292 | (ATT)9     | AATTAGGGTTGGATGGAGGG      | CTTCCGAACCACTACGCTTC      | 59.9 | 175 | Genic   | Ca5 | 31744505 | RING/FYVE/PHD zinc finger superfamily protein                              |
| CaSSR293 | (TC)6(TA)8 | TCAATCTCCATCTTCCCCTG      | CAACAAGTCCCACCAATA        | 60.0 | 222 | Genomic | Ca5 | 31861702 |                                                                            |
| CaSSR294 | (TG)7      | TTTTTCCCTTTATCGCATGG      | TAGGGGAAGGCAAATGTACG      | 60.0 | 145 | Genic   | Ca5 | 32856391 | Expressed protein                                                          |
| CaSSR295 | (CGG)5     | CTGAGGATTTTGAATGAAC       | TCATCTACACTCCGATCTCAC     | 54.0 | 145 | Genic   | Ca5 | 34050111 | WRKY Transcription Factor                                                  |
| CaSSR296 | (TAT)8     | CCAGTTGTTGCCTCGGTATT      | CAGGTTGATGTCCGAATGTG      | 60.0 | 273 | Genic   | Ca5 | 34521276 | Expressed protein                                                          |
| CaSSR297 | (AAG)10    | CCAGCCATGGTAATTTGGAC      | TTCTACAACCGTTTTTCTTCTG    | 60.2 | 204 | Genomic | Ca5 | 34626059 |                                                                            |
| CaSSR298 | (ATAA)9    | TTGGTTGCTAGACCAAGGG       | CGGAATCCGATTGCTTCTAC      | 60.1 | 230 | Genomic | Ca5 | 35432669 |                                                                            |
| CaSSR299 | (AG)6      | AAGCATCAGAAGAATCAGACAGG   | CTTCTCCTCGAGATCCTCC       | 60.3 | 220 | Genic   | Ca5 | 35796488 | AGC (cAMP-dependent, cGMP-dependent and protein Putative protein kinase C) |
| CaSSR300 | (CTTC)7    | TCTAGAAGCTTCTACTTCACC     | CGAAAGTGAGTGTGAGAAG       | 54.7 | 163 | Genic   | Ca5 | 35861292 | Heat Stress Transcription Factor (Hsf) family                              |
| CaSSR301 | (TAT)5     | CACTCCCTTCTCCAAAAT        | CGCCTTTCGAATTATTGCAT      | 60.1 | 212 | Genic   | Ca5 | 36421460 | Trypan_PARP, Procyclic acidic repetitive protein (PARP)                    |
| CaSSR302 | (ATA)6     | TCCATTTCTTCTTTTCTC        | GGTAGAAGGTGCTTGACCGA      | 60.3 | 219 | Genic   | Ca5 | 37739978 | Chondroitin sulphate attachment domain                                     |
| CaSSR303 | (TTG)4     | GGTATGACCAGAACATTTGAA     | AACATCAATTCAATCATGGAG     | 55.1 | 142 | Genic   | Ca5 | 37896821 | protein similar to a subunit of the CCAAT promoter motif binding complex   |
| CaSSR304 | (AT)10     | AACAAGTCTGCAACAACCTTCT    | CACAAAGTGAAGGGGTCAT       | 58.0 | 270 | Genomic | Ca5 | 38903229 |                                                                            |
| CaSSR305 | (ACC)9     | TTCTCTGAATCCAACGGTCC      | TGTGTGCGTGAGAGAAGAGG      | 60.2 | 149 | Genic   | Ca5 | 40667653 | Nodulin MtN21 /EamA-like transporter family protein                        |
| CaSSR306 | (AAC)7     | CTCTTGCAACTTCCCCACTC      | AAAGCAAAGGAGGTTTGGT       | 60.0 | 150 | Genic   | Ca5 | 41308534 | Expressed protein                                                          |
| CaSSR307 | (AG)6      | ATGGTTTTGCTCACATTCTTA     | TCTCAATTCTTCAATTCCA       | 55.0 | 151 | Genic   | Ca5 | 42499312 | the MADs box transcription factor family                                   |
| CaSSR308 | (TC)11     | CAGTGCCATCACTCCATCAC      | CACGCaAAAACAACCACAG       | 60.1 | 252 | Genomic | Ca5 | 42534709 |                                                                            |
| CaSSR309 | (GAA)4     | GGAGGAAGAGGAAGAGAGAAT     | GAGAGGACCTCAATTTCTTGT     | 55.7 | 172 | Genic   | Ca5 | 44153203 | SWI3 gene family protein                                                   |
| CaSSR310 | (ATG)4     | TATAAACCCACGCAAGTATTCG    | GTACCCATCAAATCAACTTCA     | 55.6 | 146 | Genic   | Ca5 | 45306950 | Homology Subgroup III                                                      |
| CaSSR311 | (TA)6      | CCGGCTTAATGAAAGAGGAA      | GACCATGGGATGGATGTTTC      | 60.0 | 209 | Genic   | Ca5 | 45479771 | Expressed protein                                                          |
| CaSSR312 | (AG)8      | AGAGTCAAATTAACAAGAGCATAGA | AAAATTGCCACAAGAGCAAG      | 60.2 | 122 | Genic   | Ca5 | 46316346 | CYP714A                                                                    |
| CaSSR313 | (CAC)9     | AACCCATTTGCAATCTGCT       | CGCTGAGGAGAGAGTCCAC       | 60.1 | 124 | Genic   | Ca5 | 46360697 | RING/U-box superfamily protein                                             |
| CaSSR314 | (CCATA)4   | AAAACAACACTCTCCTCTCC      | ACAGGTAGTGGGTATATTCCAG    | 55.1 | 143 | Genic   | Ca5 | 47007215 | Transcription elongation factor (TFIIS) family protein                     |
| CaSSR315 | (CAA)7     | CAAGCTCACACTGAACCTCTCT    | GTTGTTGAGTTGTGGTGATTT     | 54.8 | 146 | Genic   | Ca6 | 466443   | KANADI protein (KAN)                                                       |
| CaSSR316 | (TCATTT)3  | TCATAGATTCTTCTCCCTTCC     | TGGAACTTATAGATTTTGTGG     | 55.0 | 156 | Genic   | Ca6 | 1609131  | DA1-related protein 2 (DAR2)                                               |
| CaSSR317 | (TTCTCT)3  | CTCCACATCATTTCATTTTC      | AAACCAGACTTCCCTTCTGAG     | 54.7 | 173 | Genic   | Ca6 | 1609211  | DA1-related protein 2 (DAR2)                                               |
| CaSSR318 | (TC)9      | TAGGCATTTGCAACGCTATG      | TTTTGCGTTCTTTTCTCCT       | 59.9 | 202 | Genomic | Ca6 | 2111716  |                                                                            |
| CaSSR319 | (TTG)7     | TCACCATCGTGTGATGGACT      | TTGTTGGGTCCTCTTTTGTTTT    | 59.9 | 220 | Genic   | Ca6 | 2501203  | Expressed protein                                                          |
| CaSSR320 | (TTC)5     | GCAGCAACATCTGGTGAGAA      | CGTTCAGAGGCTAGGGTGC       | 59.9 | 205 | Genic   | Ca6 | 2549860  | RING/U-box superfamily protein                                             |
| CaSSR321 | (TTA)15    | TCCCTTCCCCTCTTTTGT        | TGTTTGGAAAACCTGTGTTTAGAGT | 59.9 | 203 | Genomic | Ca6 | 2766175  |                                                                            |
| CaSSR322 | (AAAGAG)5  | GATGCACATCATCTTCTCTG      | GCAATATTGAAAATTCAGTGT     | 55.8 | 147 | Genic   | Ca6 | 3867508  | NAC domain containing protein 75 (NAC075)                                  |
| CaSSR323 | (AT)12     | CGTTTTTCATATTCAGGCC       | CGCATGCATACGGAACCTCTA     | 59.4 | 187 | Genomic | Ca6 | 4048430  |                                                                            |



|          |            |                            |                        |      |     |         |     |          |                                                                                     |
|----------|------------|----------------------------|------------------------|------|-----|---------|-----|----------|-------------------------------------------------------------------------------------|
| CaSSR324 | (AG)7(A)13 | CATAAATGGTTGCGACATGC       | TCGACACAAAACAAAATCACCA | 60.0 | 168 | Genomic | Ca6 | 4400440  |                                                                                     |
| CaSSR325 | (TTTTTC)4  | ACAACCTACTGTGTTGGAAA       | ATTTCAAATCCTTCGTGAAAC  | 55.0 | 147 | Genic   | Ca6 | 4566075  | Transcriptional co-activator                                                        |
| CaSSR326 | (TTTTTC)4  | ACAACCTACTGTGTTGGAAA       | ATTTCAAATCCTTCGTGAAAC  | 55.0 | 147 | Genic   | Ca6 | 4566075  | Transcriptional co-activator                                                        |
| CaSSR327 | (TA)8      | CGGGTAATGAAACTCATAAATAAA   | CAATGCCTGCATTCCAATTA   | 57.8 | 274 | Genomic | Ca6 | 5169574  |                                                                                     |
| CaSSR328 | (CAA)5     | AAGACCAAGTCAAGGACTTTC      | GAATACATAATTCGTGTCGTC  | 55.1 | 144 | Genic   | Ca6 | 5237484  | Homeodomain protein                                                                 |
| CaSSR329 | (ATC)7     | TGTTCCCTTTCATCTTCAAA       | TGATCTATTTTCTTGCCACAT  | 55.1 | 151 | Genic   | Ca6 | 5237688  | Homeodomain protein                                                                 |
| CaSSR330 | (CAA)5     | TGTTCCCTTTCATCTTCAAA       | TGATCTATTTTCTTGCCACAT  | 55.1 | 151 | Genic   | Ca6 | 5237688  | Homeodomain protein                                                                 |
| CaSSR331 | (TCT)8     | GGCAGCGACAACACAACA         | TAATTGAGAATCGGGTTCCGG  | 59.9 | 199 | Genic   | Ca6 | 5259895  | BTB/POZ domain-containing protein                                                   |
| CaSSR332 | (ATT)8     | TCCTTGCCCTGTTTCATAGTTA     | GGCCCTGTAGATGATGA      | 55.2 | 121 | Genic   | Ca6 | 6141841  | Putative auxin response factor                                                      |
| CaSSR333 | (GAA)8     | TAATGAAAATTGTGGGAGAAG      | TGACCCTCTTGCATACATCAT  | 54.0 | 153 | Genic   | Ca6 | 6540055  | Putative protein kinase similar to the calcium/calmodulin-dependent protein         |
| CaSSR334 | (TTC)12    | ATCACTTCTTGCCATGTCCC       | GGTGGTGAATGAGGAGAAA    | 59.9 | 106 | Genic   | Ca6 | 6540055  | TT viral orf 1                                                                      |
| CaSSR335 | (AAAT)12   | CCGAATCCCTGTTGTAGGA        | ACTGCATGTTTGCCAGTTTT   | 59.9 | 276 | Genomic | Ca6 | 6631430  |                                                                                     |
| CaSSR336 | (GA)9      | TCACTCAAATgTAGCAATCAAA     | AATTATGCCTGAGTTGCGG    | 57.5 | 214 | Genomic | Ca6 | 7376505  |                                                                                     |
| CaSSR337 | (AT)8      | TGCAGCAGAGCATCAAATCT       | GTTGTCTGAAGGTCCCAAAA   | 59.9 | 135 | Genic   | Ca6 | 7531996  | Expressed protein                                                                   |
| CaSSR338 | (AC)8      | GCCACCGTTGTGTTCCCTTAT      | CGTTTTGAAAATCGGTGGT    | 59.8 | 183 | Genic   | Ca6 | 7645002  | LIP1 gene small GTPase                                                              |
| CaSSR339 | (CT)20     | TTTGGTGGTGAACGTTGAAA       | GGAGAAGGaAAAGGAAGGGA   | 60.0 | 243 | Genomic | Ca6 | 8335176  |                                                                                     |
| CaSSR340 | (AAAAC)5   | CGTTGCTTAAGATACAAAAC       | AGAGCTTCCAAGTCTCTTCAT  | 54.4 | 179 | Genic   | Ca6 | 8368375  | homeodomain leucine zipper class I (HD-Zip I) protein                               |
| CaSSR341 | (TGA)9     | TCATGGATTTCTTTGCTC         | CGCAACTTCTCCCTTTCATC   | 60.0 | 248 | Genomic | Ca6 | 8816079  |                                                                                     |
| CaSSR342 | (AG)10     | AGGTAGTTGAAGAAACGAACC      | AGAAGCAGGATCAATACCTTT  | 55.1 | 153 | Genic   | Ca6 | 9118284  | Basic-leucine zipper (bZIP) transcription factor family protein                     |
| CaSSR343 | (TGAT)4    | TGATTGTGGATTCTTCGATAC      | CAACTAACACCAAGAAGCAAC  | 55.2 | 150 | Genic   | Ca6 | 10053750 | basic leucine-zipper 44 (bZIP44)                                                    |
| CaSSR344 | (CAG)8     | AATCTCAGCCTCAAACCTCAAT     | GCTGTTGTGATTTTTGTTGTT  | 55.6 | 147 | Genic   | Ca6 | 12437191 | auxin response factor family protein                                                |
| CaSSR345 | (AC)12     | TTCTTTTTGTTTCTACCAAC       | CCTTTGGTGTAAAAGGGTACT  | 54.6 | 138 | Genic   | Ca6 | 12569883 | TEOSINTE BRANCHED 1, cycloidea and PCF transcription factor 2 (TCP2)                |
| CaSSR346 | (CCACTA)4  | TTGCCATTATCATCTTCTTTC      | ATAAATTGCACAGAAGGTGTG  | 54.6 | 141 | Genic   | Ca6 | 13095585 | indeterminate(ID)-domain 14 (IDD14)                                                 |
| CaSSR347 | (AACACC)3  | AGCTCATATCAAACATGTGG       | GGTTGTAATGTTGTTGCTTGT  | 55.3 | 159 | Genic   | Ca6 | 13096321 | Putative role in shoot gravitropism                                                 |
| CaSSR348 | (AGA)6     | ATCGCGTGAAGGAGAGAGAG       | TACAACACCAACGACGCATT   | 60.0 | 141 | Genic   | Ca6 | 13949884 | Protein of unknown function DUF1084 (InterPro:IPR009457)                            |
| CaSSR349 | (AC)10     | TGGCATCACAGATTTCATATG      | GCACTGCATGAGAAAGCCA    | 59.5 | 251 | Genomic | Ca6 | 14059898 |                                                                                     |
| CaSSR350 | (TC)11     | CGTTTCTCGCTCTGGAGGTA       | TTTCGTTGGTTACACGGTCA   | 60.0 | 253 | Genic   | Ca6 | 14301000 | A-type cyclin-dependent Putative protein kinase                                     |
| CaSSR351 | (AAT)27    | TGAAAGTGTTTTGAAAATTAATGATG | GTGGCTACGGAAGTCTCCAA   | 59.7 | 255 | Genomic | Ca6 | 14324174 |                                                                                     |
| CaSSR352 | (TTC)13    | CTGCATCAACCACACCAATC       | CAACGGATAATGCACTCCCT   | 60.0 | 136 | Genic   | Ca6 | 14759107 | potassium transporter                                                               |
| CaSSR353 | (ATA)11    | TTGAGCACAAAGTTTCTCT        | TCCCTTCAATAGGTAATTC    | 55.2 | 151 | Genic   | Ca6 | 14811478 | basic helix-loop-helix (bHLH) DNA-binding superfamily protein                       |
| CaSSR354 | (AT)11     | ATTGTTGGCAGTTGTGGTT        | CGGATTGTAGTGGGGCTAAT   | 60.3 | 230 | Genomic | Ca6 | 15710297 |                                                                                     |
| CaSSR355 | (TCT)5     | CATCAGTAACCGCTCAACGA       | TTTGGAGGTGAAAGAGTGG    | 60.1 | 244 | Genic   | Ca6 | 16936979 | Ribosomal protein S5 family protein                                                 |
| CaSSR356 | (TA)10     | ATCAGCACCTCATACCCGAG       | CGACAAGCCAGACTCATAA    | 60.1 | 242 | Genomic | Ca6 | 17580949 |                                                                                     |
| CaSSR357 | (TAT)9     | TATCCAAAAGTCAACAATCA       | ATATGCAACACACAGAGGAAG  | 55.7 | 141 | Genic   | Ca6 | 18298837 | ERF (ethylene response factor) subfamily B-3 of ERF/AP2 transcription factor family |
| CaSSR358 | (AT)15     | TTTTTCATCCATCACATCATCA     | TTGATGCTTTACAACGTGCG   | 59.9 | 261 | Genic   | Ca6 | 19858207 | F26K24.10 protein                                                                   |
| CaSSR359 | (ATT)15    | CGGTTACCTATTTTTAATTGTGC    | TTCTCCATCACACTGGGAGA   | 57.0 | 247 | Genomic | Ca6 | 20442770 |                                                                                     |
| CaSSR360 | (TTGATA)3  | GTGGAAGTGAATTCAAGTGAG      | GTCCAACACCATAACAATCAT  | 54.8 | 148 | Genic   | Ca6 | 20514111 | SET domain protein 35 (SDG35)                                                       |
| CaSSR361 | (TTCACA)5  | CCCACCTTCTCACTCACTCTT      | TTCTGGAGGAGATAGTAGTGGT | 56.1 | 163 | Genic   | Ca6 | 22249411 | GRAS family transcription factor                                                    |
| CaSSR362 | (CAA)8     | ACCATTTGTTGGGCATTTTC       | CGAATTGAGGGTCTTCCAA    | 60.0 | 274 | Genic   | Ca6 | 23920468 | NTMC2T5.2                                                                           |
| CaSSR363 | (AGA)4     | GGATTAATTATCTCCGACAG       | TGGTAATCTCCAGCTATCAA   | 55.4 | 122 | Genic   | Ca6 | 24448426 | the R2R3 factor gene family                                                         |
| CaSSR364 | (TC)6      | ACCAACTCACATCTAGAAGCA      | TGATCTTCCATCTTATTTCA   | 55.0 | 157 | Genic   | Ca6 | 24448740 | the R2R3 factor gene family                                                         |
| CaSSR365 | (TAG)6     | TGCAAAACCACTTTCTCTTCTG     | CGAATCACAAAATCCATCCC   | 60.1 | 140 | Genic   | Ca6 | 26357912 | GRAS family Protein, transcription factor                                           |

|           |            |                             |                            |      |     |         |     |          |                                                                             |
|-----------|------------|-----------------------------|----------------------------|------|-----|---------|-----|----------|-----------------------------------------------------------------------------|
| CaSSR366  | (TAG)7     | AAGCCTTCTATATTGCAAAAC       | CAAAATCCATCCCTAGAACTT      | 55.4 | 146 | Genic   | Ca6 | 26357925 | GRAS family Protein, transcription factor                                   |
| CaSSR367  | (ACT)7     | TGGATAACCCCTTTCTTCTTC       | AGCATTGGTTTTATGTAACGA      | 55.1 | 145 | Genic   | Ca6 | 26358317 | GRAS family Protein, transcription factor                                   |
| CaSSR368  | (AGAA)5    | GTGATCTGTCATCGTTTCAAT       | AGGAAGCTTTGAGAAAAGAGAA     | 55.0 | 141 | Genic   | Ca6 | 26358709 | GRAS family Protein, transcription factor                                   |
| CaSSR369  | (AG)6      | GCTATCGCCGATCAAGAGAA        | TTCTAAGCTTTGGAAGAGATCCA    | 59.5 | 236 | Genic   | Ca6 | 26765102 | Ras-related small GTP-binding family protein                                |
| CaSSR370  | (ATT)8     | AAAAaCCCGTGTGCTTTATTT       | AGGGCAATATGCGATTCATT       | 57.6 | 256 | Genomic | Ca6 | 26878517 |                                                                             |
| CaSSR371  | (AT)14     | CCATGCTTGACGTTCTCT          | GCCTTTCTTTCTTTGGGA         | 58.9 | 279 | Genomic | Ca6 | 29119837 |                                                                             |
| CaSSR372  | (GTG)4     | GAGGAAGTTACCAAAAGCAAC       | GGTTACATGTTTGCAATTCAT      | 55.7 | 162 | Genic   | Ca6 | 29256025 | C2H2-type zinc finger family protein                                        |
| CaSSR373  | (TAT)32    | TiCACTTGTCAAGTACAACCTATTiCA | GGAATGTGCCAACATCAGAA       | 58.5 | 273 | Genomic | Ca6 | 30258394 |                                                                             |
| CaSSR374  | (TA)10     | GCGTTAGCGTCCCTTGACTTC       | TGAAGTGGTATATCTTAAACCCAGGA | 60.0 | 257 | Genomic | Ca6 | 30465376 |                                                                             |
| CaSSR375  | (AGA)7     | GACCTCGAAATGAGAAGCG         | GCATCGTCATCTTTGCTTCA       | 60.0 | 109 | Genic   | Ca6 | 30580648 | DNA-binding protein that binds to plastid DNA non-specifically              |
| CaSSR376  | (AAT)7     | AGCGATTACCTTGAATGTGAGA      | TCACACACATGGACCGAGTT       | 58.9 | 273 | Genomic | Ca6 | 31079517 |                                                                             |
| CaSSR377  | (TA)10     | GGAGACAACCTTCTTCAACCAA      | AGCCACTTCATTGACTTGTCTC     | 58.4 | 203 | Genomic | Ca6 | 32082396 |                                                                             |
| CaSSR378# | (ATT)9     | CATTCCCATATTTCTCCCG         | AAGACAATCGAATCCAACGG       | 59.9 | 266 | Genic   | Ca6 | 32200864 | Expressed protein                                                           |
| CaSSR379  | (GAA)6     | TGTTCTGAATCTGTTTCAGG        | ACTTCTCTGTCATGCAAGGT       | 55.4 | 150 | Genic   | Ca6 | 37387965 | ovate family protein 4 (OPF4)                                               |
| CaSSR380  | (CTA)8     | TGTTGCTCCTTTCTTTGCCT        | GAGCATGTGGTGAAGCAGaA       | 60.0 | 152 | Genomic | Ca6 | 37974670 |                                                                             |
| CaSSR381  | (AG)12     | TACCACCTTTTATACGCTGCAC      | ATGAATGAACGAATGTGACTC      | 55.7 | 145 | Genic   | Ca6 | 38814576 | HAIRY MERISTEM 3 (HAM3)                                                     |
| CaSSR382  | (AT)11     | TTTTGTGTTTTGTCAAATGTAATATGC | AAGCGAGAAGTACGGAACC        | 58.6 | 244 | Genomic | Ca6 | 41910782 |                                                                             |
| CaSSR383  | (GGA)7     | TTTTGGAGGAGGAGATATAGG       | AGTCATTTGTAATGGCATCC       | 55.1 | 163 | Genic   | Ca6 | 42715963 | Dof-type zinc finger DNA-binding family protein                             |
| CaSSR384  | (TA)11     | CCCATAGAGAGCCCAACAAG        | GGTCCICTTTCTTCCGTCG        | 59.7 | 252 | Genomic | Ca6 | 43988772 |                                                                             |
| CaSSR385  | (AC)7(AT)6 | CTTTCCATTTCCCATCACAA        | AAGTCCTTGCAAAACAATCTCC     | 58.4 | 218 | Genomic | Ca6 | 47487429 |                                                                             |
| CaSSR386  | (TA)10     | TGAAAATTACGTACGGCACA        | GATGACTTGTCTCGTCGCA        | 59.1 | 153 | Genomic | Ca6 | 49250840 |                                                                             |
| CaSSR387  | (CT)15     | CACATGTTCTTGCAACCCTG        | ATTCaAAACCCaGAAAGCCC       | 60.2 | 154 | Genomic | Ca6 | 50249027 |                                                                             |
| CaSSR388  | (AG)16     | AAACGCCTTGTCACCTTTTG        | AATgGGGTGTTGATTTGGA        | 60.1 | 233 | Genomic | Ca6 | 51773961 |                                                                             |
| CaSSR389  | (AT)9      | CCiGCACTACAGAGGTCT          | AAATACGTGTCTGCACGTCG       | 60.3 | 277 | Genomic | Ca6 | 52161279 |                                                                             |
| CaSSR390  | (TTA)7     | CTCCTCAACCGCTGCATTAT        | TGGTGGTCTTCTTCTACGTT       | 60.2 | 259 | Genomic | Ca6 | 53565894 |                                                                             |
| CaSSR391  | (CAA)7     | TCAACTGTTCAACAACATCCT       | GAGGAGGAGCACAAGAAGTAT      | 55.6 | 163 | Genic   | Ca6 | 53652536 | basic helix-loop-helix (bHLH) DNA-binding superfamily protein               |
| CaSSR392  | (AAT)6     | CGGTAAGAGAAGAAGCCACG        | TGCATTCAATTCAATCCACA       | 59.9 | 280 | Genic   | Ca6 | 56766583 | putative galacturonosyltransferase activity                                 |
| CaSSR393  | (GAA)6     | GAATGGGAGGAAGTGGTTGA        | CAACCCAAACCCCTCTCTA        | 60.0 | 198 | Genic   | Ca6 | 56796755 | RING/U-box superfamily protein                                              |
| CaSSR394  | (AC)11     | ACCGAAGAGTTTGTGGACG         | GCTGCACTCATGGATGTGAC       | 60.1 | 137 | Genomic | Ca6 | 56978935 |                                                                             |
| CaSSR395  | (AT)7(AG)8 | TCACCAACTCGTTGTTACCTTT      | TCAATAAACAAATTCACATTCAAG   | 60.0 | 271 | Genomic | Ca6 | 57785268 |                                                                             |
| CaSSR396  | (AAG)6     | TCGAGGATCTGATGAAGGAAG       | TTCAGTTTCAAGCAATCACC       | 59.7 | 236 | Genic   | Ca6 | 58296246 | Major facilitator superfamily protein                                       |
| CaSSR397  | (TGTTCA)4  | GAATCACAGCCATTAACCAT        | GACAGTGTGGAAAGCAAAAG       | 55.0 | 147 | Genic   | Ca6 | 58334307 | transcription factor CIB1 (cryptochrome-interacting basic-helix-loop-helix) |
| CaSSR398  | (TA)6      | TTGCTTTGAAGAAGGGGAAA        | CCACTGCTGTCTACACTGC        | 59.5 | 155 | Genic   | Ca7 | 1283953  | Expressed protein                                                           |
| CaSSR399  | (AGA)7     | AACGATTCCAAAAGTTACGAT       | GGGTTTCTGAATTAGTTCAT       | 55.5 | 145 | Genic   | Ca7 | 1371794  | WRKY Transcription Factor                                                   |
| CaSSR400  | (CT)6(CA)7 | TTTACACCCCTAATTCGCC         | CAATTCGGCCAAAGACATT        | 59.9 | 151 | Genomic | Ca7 | 1691706  |                                                                             |
| CaSSR401  | (TC)8      | CGATCAGTTAAAACCGCACA        | TCTTCGACGAAACAAGCAA        | 59.7 | 241 | Genomic | Ca7 | 2219240  |                                                                             |
| CaSSR402  | (TTA)7     | GGGACAAGTCAGTCGGTAA         | ACACCACCACAGTAGGAA         | 60.3 | 196 | Genic   | Ca7 | 2222564  | Expressed protein                                                           |
| CaSSR403  | (AAT)7     | ACACCACCCACAGTAGGAA         | GGGCAAGTCAGTCGGTAA         | 60.0 | 196 | Genic   | Ca7 | 2222759  | Syntaxin/t-SNARE family protein                                             |
| CaSSR404  | (TTC)7     | AATGGAAGTGAAGTAGTGGT        | CTCCAATCCAATTTCCATAAT      | 55.3 | 139 | Genic   | Ca7 | 2334917  | AP2 family of transcriptional regulators                                    |
| CaSSR405  | (TAT)5     | CGCCACAACAACCCATATC         | CGAAAGAAATTGATGCGAGA       | 59.0 | 202 | Genic   | Ca7 | 2944747  | casein Putative protein kinase 1 protein family                             |
| CaSSR406  | (TC)12     | TCACTCCCTCGATCCTCAAC        | AGAAACTTGGCAAAAGCAGC       | 59.6 | 280 | Genic   | Ca7 | 3046324  | MAP Putative protein kinase Putative protein kinase 2                       |
| CaSSR407  | (TGC)4     | AGATTTGTGATTCAAGTCAGC       | TCAACAGCAACAACAGTTACA      | 54.5 | 174 | Genic   | Ca7 | 3356103  | Putative auxin response factor                                              |
| CaSSR408  | (AAG)10    | CGGCCATTGAAATGAAAA          | GTTGGAAACAAACAGCCCTT       | 60.0 | 276 | Genic   | Ca7 | 3393987  | plastidic beta-ketoacyl-ACP synthase II                                     |

|           |              |                           |                          |      |     |         |     |          |                                                                                               |
|-----------|--------------|---------------------------|--------------------------|------|-----|---------|-----|----------|-----------------------------------------------------------------------------------------------|
| CaSSR409  | (TCT)4       | CAAATTGATGCTTATCAAACC     | AGAAGGAGGAGAGATGCTTAG    | 54.9 | 159 | Genic   | Ca7 | 3750508  | the Aux/IAA family of proteins                                                                |
| CaSSR410  | (TA)8        | AACGCTCCAACGCTTAAAAT      | ATGTATGAAACAAACAAACACGA  | 58.0 | 266 | Genomic | Ca7 | 4219629  |                                                                                               |
| CaSSR411  | (CT)10       | ATTCTCCTCATAAGCCATTCT     | TTCTCGATCTATACGTCAACC    | 54.7 | 150 | Genic   | Ca7 | 6057942  | A Class II KN1-like homeodomain transcription factors                                         |
| CaSSR412  | (ATTC)6      | AGAATTCACAACCCACCGAC      | ACATCACCTCCTCCGTTAC      | 60.0 | 240 | Genic   | Ca7 | 7785589  | serine/threonine protein Putative protein kinase.                                             |
| CaSSR413  | (TC)11       | CCGATACCGGAGGATGTAGA      | CCCAAACCTCGACCTTGTGT     | 60.0 | 239 | Genic   | Ca7 | 8489146  | HNH endonuclease                                                                              |
| CaSSR414  | (CTT)7       | ATCACAACTGGTGGTAGCC       | TCTTCTCTCCTGGGGATCA      | 59.7 | 265 | Genic   | Ca7 | 8615603  | TCP family transcription factor                                                               |
| CaSSR415  | (CTT)9       | TCGACATGATAACACAAGTCA     | TAAGATCAAACAAACCTCACG    | 55.0 | 163 | Genic   | Ca7 | 8615627  | TCP family transcription factor                                                               |
| CaSSR416  | (TAT)7       | CATCAACGACGACGAGAGAA      | AACACTTGCCGTTGGTTAC      | 60.0 | 214 | Genomic | Ca7 | 8921807  |                                                                                               |
| CaSSR417  | (AGA)6       | GAGGAGGTGAATTTGGCAGA      | TGTTGGTTCTATTAACCCCAT    | 59.5 | 217 | Genic   | Ca7 | 8979287  | Dynein light chain type 1 family protein                                                      |
| CaSSR418  | (AAGAAC)3    | ATACTTCCCCTGAAGAAGATG     | CCACGAACCTCTTAACCTTT     | 55.0 | 142 | Genic   | Ca7 | 9867339  | C2H2-like zinc finger protein                                                                 |
| CaSSR419  | (AT)11       | CCACATCCACAACACAACA       | TGTTCAACCAACCAACTCA      | 58.8 | 267 | Genomic | Ca7 | 9969630  |                                                                                               |
| CaSSR420  | (AGA)12      | GGAGCTGTGAACGGTGAAT       | CGAAACGCACCCATTTTGT      | 60.1 | 207 | Genomic | Ca7 | 10031195 |                                                                                               |
| CaSSR421  | (TGAATT)4    | TGAACTATCCCTTTAGGAAC      | GAAGTTGATGAGTTTGAATTCG   | 55.0 | 153 | Genic   | Ca7 | 10115566 | ERF (ethylene response factor) subfamily B-3 of ERF/AP2 transcription factor family (ATERF-5) |
| CaSSR422  | (TC)7        | CCCAGAAAAGAGAAAACGCA      | ATTTCTCAACTGTCTCGCCG     | 60.4 | 269 | Genic   | Ca7 | 10296770 | Inositol phosphorylceramide synthase                                                          |
| CaSSR423  | (GTG)4       | AAGAGTTCAAGAATTGAAGG      | AGCCATAGAGAAAGTGGTTTT    | 55.2 | 149 | Genic   | Ca7 | 11192806 | homeobox protein HAT22, the HD-Zip II family.                                                 |
| CaSSR424  | (AC)8        | CGTGGGACGAAGTGAAGTCTT     | AGTTTGGCGCTGAATTTGAC     | 60.3 | 230 | Genomic | Ca7 | 11425179 |                                                                                               |
| CaSSR425  | (AGA)6g(A)10 | TTCTTCTTAGAGCACAAACCC     | TCCTCTCTCCGTTACCCA       | 59.8 | 190 | Genomic | Ca7 | 11656778 |                                                                                               |
| CaSSR426  | (AT)7ag(T)11 | TTCGTTTTTCATTTTTCTCAGC    | ACAACGTCGCACTAAAACGa     | 59.8 | 172 | Genomic | Ca7 | 11960437 |                                                                                               |
| CaSSR427  | (ACACAA)4    | CCTCTCTTATTTTGTGTCAAC     | TGAAACTGTCCGTTCTGTAAC    | 54.9 | 165 | Genic   | Ca7 | 12021104 | WRKY DNA-binding protein 15 (WRKY15).                                                         |
| CaSSR428  | (TA)10       | TTTGCAAATGGCTCACTCAT      | TTCAAATGAAATATTTCTTCCG   | 59.3 | 233 | Genomic | Ca7 | 14610251 |                                                                                               |
| CaSSR429  | (TAT)5       | AAACTTGAGGGCAAGCCTTT      | CAAAACACAGAGTTGAAGGAACA  | 59.3 | 103 | Genic   | Ca7 | 14738300 | flavanone 3-hydroxylase                                                                       |
| CaSSR430# | (AG)12       | AAGCAGAGACCCATGTGGAG      | AGTGGGGAGGGAACAAACT      | 60.3 | 233 | Genomic | Ca7 | 15721218 |                                                                                               |
| CaSSR431  | (ATGG)3      | AGGTTTACCATCAGCTTCACT     | TCCTTATGTTGCAATGTATCC    | 55.6 | 157 | Genic   | Ca7 | 17777145 | G group bZIP transcription factor family member                                               |
| CaSSR432  | (ATGG)3      | AGGTTTACCATCAGCTTCACT     | TCCTTATGTTGCAATGTATCC    | 55.6 | 157 | Genic   | Ca7 | 17777145 | G group bZIP transcription factor family member                                               |
| CaSSR433  | (TTC)7       | GTCTTGGGAACCTTGCGTTA      | GATGCGTAACTACAACCGCA     | 59.8 | 160 | Genic   | Ca7 | 18618008 | Tetratricopeptide repeat (TPR)-like superfamily protein                                       |
| CaSSR434  | (ATT)28      | TGAACAACTCAAATAAACAACTTCC | TCTCACTAATCCaAAACaCCaAAA | 59.8 | 257 | Genomic | Ca7 | 19594142 |                                                                                               |
| CaSSR435  | (CT)18       | ACCGCCTCAATTTCTTCTTA      | TAATTTCAACGGACAGTGTCTT   | 56.6 | 148 | Genic   | Ca7 | 19831349 | PLATZ transcription factor family protein                                                     |
| CaSSR436  | (TTC)7       | AGTGATTCTCTGTCTCTGCTGC    | AGAATAGAAAACGGCAATGTT    | 54.5 | 155 | Genic   | Ca7 | 19942079 | basic helix-loop-helix (bHLH) DNA-binding superfamily protein                                 |
| CaSSR437  | (TTC)7       | AGTGATTCTCTGTCTCTGCTGC    | AGAATAGAAAACGGCAATGTT    | 54.5 | 155 | Genic   | Ca7 | 19942079 | basic helix-loop-helix (bHLH) DNA-binding superfamily protein                                 |
| CaSSR438  | (GAA)8       | AACATCATCATCAAGTTGGAG     | TGAAGAAGAACACTTAATGG     | 55.1 | 154 | Genic   | Ca7 | 20120406 | putative transcription factor; KANADI family                                                  |
| CaSSR439  | (TAT)6       | GGTTTGTCCCTTTACTTGT       | CTCTCAACTGAACCTACCT      | 55.0 | 141 | Genic   | Ca7 | 20231155 | Floral homeotic gene encoding a MADS domain protein homologous to SRF transcription factors   |
| CaSSR440  | (TA)11       | TATCTCCACTCCCTCGTTCC      | TGTTCTAGCAGGACCTTCC      | 59.1 | 197 | Genomic | Ca7 | 21614939 |                                                                                               |
| CaSSR441  | (AGC)4       | CTGGTGTATTTTCGTCAGTC      | GATTCAAAATAGGGGTCTCAC    | 54.9 | 153 | Genic   | Ca7 | 21805504 | Putative transposase                                                                          |
| CaSSR442  | (TTGGAA)3    | ATGATGTTGGTGTTCAGAG       | TAATATCACTGCGAAATCCAC    | 55.1 | 159 | Genic   | Ca7 | 24021097 | homeobox protein 34 (HB34)                                                                    |
| CaSSR443  | (AT)13       | CCGCAATCATATCAACTTtGTG    | CCCTTCCAATCTTCAATCC      | 60.4 | 243 | Genomic | Ca7 | 24412796 |                                                                                               |
| CaSSR444  | (AT)6(AC)6   | ATGCAAAGGTGTTTCGTGTG      | CAAAGTGAGGATGAACCAATTC   | 59.6 | 229 | Genomic | Ca7 | 27443030 |                                                                                               |
| CaSSR445# | (AG)14       | AGCGGTAGGTACTTAAGAAGG     | AAGCTGTCTCCTAAATGGAAG    | 54.7 | 155 | Genic   | Ca7 | 28547368 | SBP-box gene, a the SPL gene family                                                           |
| CaSSR446  | (AATT)6      | GCTCCTCCATTAACCTATTTT     | CAACTCAAGCTCAATGTTTT     | 55.5 | 168 | Genic   | Ca7 | 28548004 | SBP-box gene, a the SPL gene family                                                           |
| CaSSR447  | (AG)6(A)12   | TTGAATCGAAATGGGTGTGA      | cCCCTTTGCCTTATTCCAT      | 59.9 | 197 | Genomic | Ca7 | 29567814 |                                                                                               |
| CaSSR448  | (AT)21       | TCGGATTAGTCATGaGAAa       | GGATAATACGAgTTTGTTCGAA   | 58.4 | 205 | Genomic | Ca7 | 30653052 |                                                                                               |

|           |                  |                            |                        |      |     |         |     |          |                                                                                  |
|-----------|------------------|----------------------------|------------------------|------|-----|---------|-----|----------|----------------------------------------------------------------------------------|
| CaSSR449  | (TC)12           | CCCCTCcATCTACTGTTTCC       | AAACCTAGCTTGGCAAAAACC  | 58.4 | 252 | Genomic | Ca7 | 31192294 |                                                                                  |
| CaSSR450  | (TA)10           | GTGACGGCCTCCTTAACAAC       | TTTTGGTGGAACTTGCCi     | 59.6 | 264 | Genomic | Ca7 | 31642295 |                                                                                  |
| CaSSR451  | (TTGTGA)4        | TTTGAAGGTCTTGTGTGT         | AGTGCAAGAGCTATGACAAAAC | 54.9 | 151 | Genic   | Ca7 | 31893675 | indeterminate(ID)-domain 11 (IDD11)                                              |
| CaSSR452  | (TTGAGT)3        | GACAAAGCTATAACCTCAGCA      | CAGGAAACAGAAGTGAATTTG  | 54.9 | 148 | Genic   | Ca7 | 31894863 | indeterminate(ID)-domain 11 (IDD11)                                              |
| CaSSR453  | (TTTGAT)6        | CAAGAAGGTGAAGTTAAAGCA      | TCCTCAACAACAACAACAACA  | 55.0 | 155 | Genic   | Ca7 | 32855952 | Growth regulating factor, transcription activator                                |
| CaSSR454  | (TTTGAT)6        | CAAGAAGGTGAAGTTAAAGCA      | TCCTCAACAACAACAACAACA  | 55.0 | 155 | Genic   | Ca7 | 32855952 | Growth regulating factor, transcription activator                                |
| CaSSR455  | (TC)8            | TCCAATGAGTTGTGACGAA        | CGGAGATGAATTTCCGAGA    | 60.1 | 201 | Genomic | Ca7 | 33218307 |                                                                                  |
| CaSSR456  | (AAT)9           | CAAACGGAGAGGGATGAAGA       | TGATCCATGCTTTTCCAAAT   | 58.0 | 270 | Genic   | Ca7 | 33782743 | Putative 1-phosphatidylinositol-3-phosphate (PtdIns3P) 5-Putative protein kinase |
| CaSSR457  | (ATG)4           | CTTCTCCATCAACAACAAATC      | CTTGTTTCCAAGTGACAATTC  | 54.8 | 161 | Genic   | Ca7 | 34320789 | NGATHA3 (NGA3)                                                                   |
| CaSSR458  | (ATC)7           | ACCAACCTACAAGTCTCTTC       | GTTATGCATCTCATGGTGAAC  | 55.0 | 142 | Genic   | Ca7 | 34923150 | protein containing Dof zinc finger motifs                                        |
| CaSSR459  | (ATC)4           | TCTTGAATCCAGCAGATTTAG      | TGTATTTCTCTTTTCTCGTG   | 54.8 | 150 | Genic   | Ca7 | 35180540 | basic helix-loop-helix (bHLH) DNA-binding superfamily protein                    |
| CaSSR460  | (TA)11           | ACTAATGCCAATCGCTCAGG       | ATGTGATGCGTGGTTGAGTC   | 60.2 | 267 | Genomic | Ca7 | 35187940 |                                                                                  |
| CaSSR461  | (CAAGCC)3        | ATGTCCATGCAAGTAAACAAG      | CGACGACCTCTACCTTCTACT  | 55.3 | 137 | Genic   | Ca7 | 38472298 | TCP family transcription factor                                                  |
| CaSSR462  | (AAT)45          | GTCATTTTCAACTGACTCATATTCAT | TTCTATGGaAAcCAGTGAGC   | 57.8 | 247 | Genomic | Ca7 | 42333636 |                                                                                  |
| CaSSR463  | (ATG)5           | TACGGAGGCTATGGATGGTC       | CACCTTCCACTCCTTTGTGTC  | 59.9 | 194 | Genic   | Ca7 | 48439099 | Expressed protein                                                                |
| CaSSR464  | (AAT)24          | TCACCTTCATTGTTGGTCGT       | TTGTAATTTGTGGCACCCAG   | 59.0 | 256 | Genomic | Ca7 | 48752339 |                                                                                  |
| CaSSR465  | (TTC)5           | CCCTCTCTCTACGACACCG        | CGGTGGaCATCCTCGTATCT   | 59.9 | 279 | Genomic | Ca8 | 1930653  |                                                                                  |
| CaSSR466  | (AG)6            | TGTCAAAGCGAGAATTCCA        | GGAAGCAGCTGGTTTTGTTG   | 60.8 | 280 | Genic   | Ca8 | 2001637  | protein with hydroxymethylglutaryl-CoA synthase activity                         |
| CaSSR467  | (ATA)7           | CAAAGGGGAAGAAGTGTTC        | GCCATTTCTGGAGTTGGAAA   | 59.7 | 219 | Genomic | Ca8 | 2524466  |                                                                                  |
| CaSSR468  | (TGAT)3          | GCTCTAAGACCCAATGTTTT       | GAATCAGTGATGAAGAAGACG  | 55.2 | 151 | Genic   | Ca8 | 2557055  | homeodomain-leucine zipper protein                                               |
| CaSSR469  | (CAA)7           | TTTCAACAATGCCAACAAA        | TGGAAGAAGGGGAAGAAACA   | 59.8 | 211 | Genic   | Ca8 | 3154215  | basic helix-loop-helix (bHLH) DNA-binding superfamily protein                    |
| CaSSR470  | (AT)6            | TTTTCAAAGAACCCCAACAGA      | AGCAGACATTTGTGCAGTG    | 59.9 | 159 | Genic   | Ca8 | 3763063  | Chaperone DnaJ-domain superfamily protein                                        |
| CaSSR471  | (ACT)7           | CAAACCCCAATGCCACT          | TTAGCTGAGCTGTTTGGCG    | 60.3 | 205 | Genic   | Ca8 | 3945750  | Phototropic-responsive NPH3 family protein                                       |
| CaSSR472  | (TGA)5           | TCCAATTCCTCACAACCACA       | CTCTTAACTCCGCCGTC AAC  | 59.9 | 197 | Genic   | Ca8 | 4243742  | Homeodomain-like superfamily protein                                             |
| CaSSR473  | (TTA)9           | AAGTTGAGGAAGGGATGGT        | TAGTGGGCTTCGTATTTGGG   | 59.8 | 274 | Genomic | Ca8 | 4270429  |                                                                                  |
| CaSSR474  | (TGT)7           | ATATTTTTGTTGTTGGTGTGCG     | GAAGCCAATGGTAGAAGAAAT  | 55.2 | 155 | Genic   | Ca8 | 4623460  | BEL family of homeodomain proteins                                               |
| CaSSR475  | (TGT)7           | ATATTTTTGTTGTTGGTGTGCG     | GAAGCCAATGGTAGAAGAAAT  | 55.2 | 155 | Genic   | Ca8 | 4623460  | BEL family of homeodomain proteins                                               |
| CaSSR476  | (AG)6aaagaga(GT) | CGCGAAGGAAAGAGACGAG        | TGCAGGGTATGAAAGGATGA   | 60.4 | 141 | Genomic | Ca8 | 4628934  |                                                                                  |
| CaSSR477  | (TTC)4           | TAGATCTCACACACACAATGG      | GTTATGGTGTGAATTTTGAGG  | 54.4 | 143 | Genic   | Ca8 | 5196644  | homeobox protein 24 (HB24)                                                       |
| CaSSR478  | (ATT)4           | TCTACAGACACAAAAGGGGT       | CACCTTATCTGTGCACTCTTT  | 54.9 | 150 | Genic   | Ca8 | 5411626  | SHI gene family protein                                                          |
| CaSSR479  | (AG)7            | CACAAAAGGGGTAAGTGGTCA      | CGCATTCAACTCATTCTGTG   | 59.7 | 232 | Genic   | Ca8 | 5411634  | SHI gene family protein                                                          |
| CaSSR480# | (TTGAG)4         | AATCCAATCGAAGAGAGAGAG      | ACTCTAGGGTTTTCACTTTCC  | 55.3 | 154 | Genic   | Ca8 | 5569895  | DNA binding                                                                      |
| CaSSR481  | (GAA)6           | TGCAAGTTAACACGAGCACC       | TTCCAGCAAAATTTTGAACC   | 59.9 | 189 | Genic   | Ca8 | 5822343  | Chalcone-flavanone isomerase family protein                                      |
| CaSSR482  | (GGT)5           | TCCTCTTCGACAATTCGCTT       | GAAGGAATGGTGTCTTTTGG   | 59.5 | 173 | Genic   | Ca8 | 6160737  | Expressed protein                                                                |
| CaSSR483  | (TCT)8           | TTCAATCTCTTCACGCCCTT       | GAAGGTTTCGAGTGCCTCAG   | 60.0 | 160 | Genic   | Ca8 | 6688803  | Pentatricopeptide repeat (PPR) superfamily protein                               |
| CaSSR484  | (AAG)8           | GAACCAACATGCACAATGC        | TCCTGCGTATCTGTCTTTGT   | 60.0 | 278 | Genomic | Ca8 | 7731588  |                                                                                  |
| CaSSR485  | (CTA)7           | CACAAGGGTTTATGATAGTGC      | CCATGATAAGAAGACAACCTG  | 54.9 | 150 | Genic   | Ca8 | 8364902  | homeobox-7 (HB-7)                                                                |
| CaSSR486  | (AGA)4           | TGAGATTGGTGAAGAAAGG        | AATTTGTCCACCTTAGCCTAC  | 54.6 | 155 | Genic   | Ca8 | 8639326  | the R2R3 factor gene family.                                                     |
| CaSSR487  | (AATAAC)5        | TCACAGAAGCAGAATCAAAGT      | CAAAACTCAGAATCTCACCAG  | 55.2 | 148 | Genic   | Ca8 | 8841425  | MYC-related transcriptional activator                                            |
| CaSSR488  | (AT)9            | AGGCCAGTTGACCATATGC        | GCTGGAACCATTTCCAATGT   | 60.1 | 171 | Genomic | Ca8 | 10925248 |                                                                                  |

|          |          |                            |                          |      |     |         |     |          |                                                                         |
|----------|----------|----------------------------|--------------------------|------|-----|---------|-----|----------|-------------------------------------------------------------------------|
| CaSSR489 | (TA)10   | TTgaATATTGTGTTTGATTCCTTT   | CCCTCATATTCAAAACAATCCC   | 58.1 | 219 | Genomic | Ca8 | 11159303 |                                                                         |
| CaSSR490 | (AT)10   | CAAATCAATATACAACACATCACTCC | CTTGCTCCTACGTATCCCCA     | 58.8 | 215 | Genomic | Ca8 | 12030526 |                                                                         |
| CaSSR491 | (TA)10   | TGTCTTCAAAGGATAACTCATGC    | TCATTTTGAGTGTGAAGATTATgG | 59.7 | 207 | Genomic | Ca8 | 13144169 |                                                                         |
| CaSSR492 | (ACA)5   | CCCAGATACAATGCATACGCT      | CCGATTTTCCTTCCTCAACA     | 60.0 | 222 | Genic   | Ca8 | 14017713 | Expressed protein                                                       |
| CaSSR493 | (CCT)5   | CATCATCTGTTGCCTCTTAGT      | ATGAAGATGATGATTCGATG     | 54.5 | 167 | Genic   | Ca8 | 14955395 | Alcohol dehydrogenase transcription factor Myb/SANT-like family protein |
| CaSSR494 | (ATCAA)4 | AAGTACTGTGAATGCTTCCAA      | CTTGCTGAATATACGTGTGGT    | 55.1 | 156 | Genic   | Ca8 | 15220963 | Tesmin/TSO1-like CXC domain-containing protein                          |
| CaSSR495 | (ATCAA)4 | AAGTACTGTGAATGCTTCCAA      | CTTGCTGAATATACGTGTGGT    | 55.1 | 156 | Genic   | Ca8 | 15220963 | Tesmin/TSO1-like CXC domain-containing protein                          |
| CaSSR496 | (TCT)4   | TAAATCGCCTAGAGATGTTCA      | CATAACTTGTCCGAGTCTTG     | 55.2 | 155 | Genic   | Ca8 | 15607448 | DREB subfamily A-4 of ERF/AP2 transcription factor family               |

\*CaSSR *Cicer arietinum* SSR

# seven informative genomic and genic microsatellite markers discriminated all the 94 cultivated and wild *Cicer* accessions from each other
