# Supplementary material for: Natural Allelic Diversity, Genetic Structure and Linkage Disequilibrium Pattern in Wild Chickpea
Source: PubMed Central journal article supplement (PMC4164632; doi:10.1371/journal.pone.0107484), 2014-09-15
Supplement: pone.0107484.s011.pdf [file pone.0107484.s011.pdf]

**Table S4: Polymorphic potential (represented by diverse statistical measures) detected by 478 genic and genomic microsatellite markers and 380 TF gene-derived SNP markers among 94 cultivated and wild *Cicer* accessions**

| Species/accessions used                                 | Types of markers used          | Number (%) of markers showing polymorphism | Number and range of alleles amplified | PIC (polymorphism information content) | Gene diversity            | Heterozygosity             | Major allele frequency    |
|---------------------------------------------------------|--------------------------------|--------------------------------------------|---------------------------------------|----------------------------------------|---------------------------|----------------------------|---------------------------|
| <b><i>C. arietinum</i></b><br><b>(12 accessions)</b>    | Microsatellites                | 116 (23.5)                                 | 1134 & 1-4<br>(2.3088)                | 0.1767-0.6786<br>(0.2872)              | 0.1799-0.7528<br>(0.3058) | 0.0000-0.0833<br>(0.000)   | 0.4167-0.9570<br>(0.9142) |
|                                                         | SNPs                           | 42 (10.9)                                  | 730 & 1-2<br>(1.9099)                 | 0.1767-0.3859<br>(0.2164)              | 0.1799-0.4457<br>(0.2187) | 0.0000-0.0833<br>(0.0055)  | 0.7778-1<br>(0.9889)      |
|                                                         | Total (Microsatellites + SNPs) | 158 (18)                                   | 1864 & 1-4<br>(2.1250)                | 0.1911-0.6786<br>(0.2467)              | 0.2128-0.7528<br>(0.2559) | 0.0000-0.000<br>(0.000)    | 0.4167-1<br>(0.9570)      |
| <b><i>C. reticulatum</i></b><br><b>(16 accessions)</b>  | Microsatellites                | 456 (92.5)                                 | 1873 & 1-8<br>(3.7941)                | 0.2103-0.8674<br>(0.5786)              | 0.2172-0.8969<br>(0.6372) | 0.0000-0.0625<br>(0.0009)  | 0.25-1 (0.6634)           |
|                                                         | SNPs                           | 335 (87.2)                                 | 741 & 1-2<br>(1.9352)                 | 0.1587-0.475<br>(0.3851)               | 0.1605-0.6<br>(0.4251)    | 0.0625-0.25<br>(0.0565)    | 0.5-1<br>(0.8386)         |
|                                                         | Total (Microsatellites + SNPs) | 791 (90.2)                                 | 2614 & 1-8<br>(3.2453)                | 0.1587-0.8674<br>(0.4679)              | 0.1605-0.8969<br>(0.5158) | 0.0625-0.25<br>(0.0327)    | 0.25-1 (0.7637)           |
| <b><i>C. echinospermum</i></b><br><b>(8 accessions)</b> | Microsatellites                | 348 (70.6)                                 | 1479 & 1-5<br>(3.0588)                | 0.2948-0.7675<br>(0.4530)              | 0.3188-0.8188<br>(0.4925) | 0.0000-0.000<br>(0.000)    | 0.375-1 (0.7897)          |
|                                                         | SNPs                           | 84 (21.9)                                  | 614 & 1-2<br>(1.6198)                 | 0.2103-0.4750<br>(0.2504)              | 0.2172-0.6<br>(0.2608)    | 0.1250-0.75<br>(0.0181)    | 0.5-1 (0.9576)            |
|                                                         | Total (Microsatellites + SNPs) | 432 (49.3)                                 | 2093 & 1-5<br>(2.5786)                | 0.2103-0.7675<br>(0.3371)              | 0.2172-0.8188<br>(0.3599) | 0.1250-0.7500<br>(0.0103)  | 0.3750-1<br>(0.8858)      |
| <b><i>C. judaicum</i></b><br><b>(22 accessions)</b>     | Microsatellites                | 428 (86.8)                                 | 1804 & 1-7<br>(3.6618)                | 0.1830-0.8251<br>(0.5889)              | 0.1868-0.8619<br>(0.6573) | 0.0476-0.07140<br>(0.0018) | 0.3158-1<br>(0.6125)      |
|                                                         | SNPs                           | 198 (51.6)                                 | 691 & 1-2<br>(1.8055)                 | 0.1454-0.4750<br>(0.2858)              | 0.1465-0.5<br>(0.2985)    | 0.0476-0.619<br>(0.0599)   | 0.5-1 (0.9314)            |
|                                                         | Total (Microsatellites + SNPs) | 626 (71.4)                                 | 2495 & 1-7<br>(3.000)                 | 0.1454-0.8251<br>(0.4155)              | 0.1465-0.8619<br>(0.4520) | 0.0476-0.619<br>(0.0349)   | 0.3158-1<br>(0.7950)      |

| Species/accessions used                          | Types of markers used          | Number (%) of markers showing polymorphism | Number of alleles amplified* | PIC (polymorphism information content)* | Gene diversity*           | Heterozygosity            | Major allele frequency* |
|--------------------------------------------------|--------------------------------|--------------------------------------------|------------------------------|-----------------------------------------|---------------------------|---------------------------|-------------------------|
| <b><i>C. bijugum</i></b><br>(19 accessions)      | Microsatellites                | 276 (56)                                   | 1538 & 1-6<br>(3.1296)       | 0.1948-0.7797<br>(0.4367)               | 0.1997-0.8258<br>(0.4761) | 0.0556 (0.001)            | 0.3684-1<br>(0.7939)    |
|                                                  | SNPs                           | 122 (31.8)                                 | 668 & 1-2<br>(1.7429)        | 0.1499-0.4750<br>(0.2799)               | 0.1512-0.5<br>(0.2867)    | 0.0526-0.6111<br>(0.0315) | 0.5-1 (0.9270)          |
|                                                  | Total (Microsatellites + SNPs) | 398 (45.4)                                 | 2206 & 1-6<br>(2.5723)       | 0.1499-0.7797<br>(0.3503)               | 0.1512-0.8258<br>(0.3727) | 0.0526-0.6111<br>(0.0181) | 0.3684-1<br>(0.8650)    |
| <b><i>C. pinnatifidum</i></b><br>(16 accessions) | Microsatellites                | 362 (73.4)                                 | 1578 & 1-6<br>(3.2059)       | 0.2103-0.7816<br>(0.4874)               | 0.2172-0.8266<br>(0.5405) | 0.0000-0.0000<br>(0.0000) | 0.3750-1<br>(0.7299)    |
|                                                  | SNPs                           | 72 (18.7)                                  | 637 & 1-2<br>(1.6648)        | 0.1587-0.3733<br>(0.2628)               | 0.1605-0.5<br>(0.2725)    | 0.0625-0.5<br>(0.0447)    | 0.5417-1<br>(0.9433)    |
|                                                  | Total (Microsatellites + SNPs) | 434 (49.5)                                 | 2215 & 1-6<br>(2.6101)       | 0.1587-0.7816<br>(0.3588)               | 0.1605-0.8266<br>(0.3865) | 0.0625-0.5<br>(0.0253)    | 0.3750-1<br>(0.8521)    |
| <b><i>C. microphyllum</i></b><br>(1 accession)   | Microsatellites                | NA                                         | NA                           | NA                                      | NA                        | NA                        | NA                      |
|                                                  | SNPs                           | NA                                         | NA                           | NA                                      | NA                        | NA                        | NA                      |
|                                                  | Total (Microsatellites + SNPs) | NA                                         | NA                           | NA                                      | NA                        | NA                        | NA                      |
| <b>Total</b><br>(94 accessions)                  | Microsatellites                | 478 (96.4)                                 | 2943 & 1-13<br>(5.9706)      | 0.1801-0.9777<br>(0.7534)               | 0.1822-0.9878<br>(0.8011) | 0.0110-0.0132<br>(0.0007) | 0.2065-1<br>(0.5140)    |
|                                                  | SNPs                           | 380 (98.9)                                 | 760 & 1-2<br>(1.9780)        | 0.1213-0.4735<br>(0.4108)               | 0.1215-0.5970<br>(0.4533) | 0.0109-0.3152<br>(0.0386) | 0.5385-1<br>(0.8313)    |
|                                                  | Total (Microsatellites + SNPs) | 858 (97.5)                                 | 3703 & 1-13<br>(4.2579)      | 0.1213-0.9777<br>(0.5573)               | 0.315-0.9878<br>(0.6020)  | 0.0108-0.3152<br>(0.0225) | 0.2065-1<br>(0.6956)    |

Values mentioned in the parentheses indicate the average estimates of their range obtained for each polymorphism statistics among 94 *Cicer* accessions
