# Supplementary material for: Natural Allelic Diversity, Genetic Structure and Linkage Disequilibrium Pattern in Wild Chickpea
Source: PubMed Central journal article supplement (PMC4164632; doi:10.1371/journal.pone.0107484), 2014-09-15
Supplement: pone.0107484.s012.pdf [file pone.0107484.s012.pdf]

**Table S5: Molecular diversity (represented by different diversity statistical measures) detected by 478 genic and genomic microsatellite markers and 380 TF gene-derived SNP markers among 94 cultivated and wild accessions within and between *Cicer* species**

| Within species          | Genetic distance of microsatellite markers |                                                              |        | Genetic distance of SNP markers                                                      |                                     |        | Genetic distance (microsatellite + SNP) markers |                                    |        |
|-------------------------|--------------------------------------------|--------------------------------------------------------------|--------|--------------------------------------------------------------------------------------|-------------------------------------|--------|-------------------------------------------------|------------------------------------|--------|
|                         | Minimum                                    | Maximum                                                      | Mean   | Minimum                                                                              | Maximum                             | Mean   | Minimum                                         | Maximum                            | Mean   |
| <i>C. arietinum</i>     | 0.1303<br>(ICCX810800-<br>ICCV96970)       | 0.409<br>(ICC4958-<br>IC296132),<br>(ICCX810800-<br>ICC4958) | 0.3057 | 0.1033 (ICCV2-<br>IC296131),<br>(ICC95334-<br>IC296131),<br>(ICCV96329-<br>IC296131) | 0.2403<br>(ICCX810800-<br>IC296131) | 0.2171 | 0.1131<br>(ICCV96329-<br>BG2024)                | 0.3057<br>(ICCX81080<br>0-ICC4958) | 0.2585 |
| <i>C. reticulatum</i>   | 0.2719<br>(ILWC229-<br>ILWC219)            | 0.8418<br>(ILWC290-<br>ILWC257)                              | 0.6629 | 0.1178<br>(ILWC233-<br>ILWC229)                                                      | 0.6419<br>(ILWC237-<br>ICC17160)    | 0.4102 | 0.2149<br>(ILWC229-<br>ILWC219)                 | 0.674<br>(ILWC237-<br>ICC17160)    | 0.519  |
| <i>C. echinospermum</i> | 0.1597<br>(ILWC288-<br>ICC17159)           | 0.7224<br>(ILWC35-<br>IG135418)                              | 0.4932 | 0.1034<br>(ILWC245-<br>IG135418)                                                     | 0.3333<br>(ILWC239-<br>ICC17159)    | 0.2621 | 0.1859<br>(ILWC288-<br>ICC17159)                | 0.455<br>(IG135418-<br>ICC17159)   | 0.3798 |
| <i>C. judaicum</i>      | 0.1455<br>(ILWC211-<br>ILWC20)             | 0.9188<br>(ILWC45-<br>ILWC30)                                | 0.6784 | 0.1036<br>(ILWC278-<br>ILWC273)                                                      | 0.7556<br>(ILWC283-<br>ILWC31)      | 0.2798 | 0.1289<br>(ILWC211-<br>ILWC20)                  | 0.8486<br>(ILWC38-<br>ILWC283)     | 0.4634 |
| <i>C. bijugum</i>       | 0.1444<br>(ILWC227-<br>ILWC209)            | 0.74 (ILWC32-<br>ILWC228)                                    | 0.4908 | 0.1444<br>(IG136792-<br>ILWC209)                                                     | 0.74 (IG136792-<br>ILWC240)         | 0.4908 | 0.1336<br>(ILWC240-<br>ILWC8)                   | 0.5295<br>(ILWC32-<br>ILWC42)      | 0.3523 |
| <i>C. pinnatifidum</i>  | 0.1625<br>(ILWC248-<br>ILWC226)            | 0.7323 (ILWC9-<br>ILWC250),<br>(ILWC29-<br>ILWC289)          | 0.563  | 0.1037<br>(ILWC289-<br>ILWC236)                                                      | 0.92 (ILWC49-<br>ILWC250)           | 0.2308 | 0.1504<br>(ILWC248-<br>ILWC226)                 | 0.5036<br>(ILWC49-<br>ILWC250)     | 0.3927 |

| Between species                                  | Genetic distance (microsatellite + SNP) markers |                                            |         |
|--------------------------------------------------|-------------------------------------------------|--------------------------------------------|---------|
|                                                  | Minimum                                         | Maximum                                    | Average |
| <i>C. arietinum</i> - <i>C. reticulatum</i>      | 0.1131 (ICCV96329-BG2024)                       | 0.879 (ILWC36-ICCV2), (ILWC36-ICC4958)     | 0.6834  |
| <i>C. arietinum</i> - <i>C. echinospermum</i>    | 0.1131 (ICCV96329-BG2024)                       | 0.8796 (ICCV2-ILWC245), (ILWC45-PhuleG515) | 0.6625  |
| <i>C. arietinum</i> - <i>C. judaicum</i>         | 0.1131 (ICCV96329-BG2024)                       | 0.9106 (ILWC283-ICCV96329)                 | 0.6979  |
| <i>C. arietinum</i> - <i>C. bijugum</i>          | 0.1131 (ICCV96329-BG2024)                       | 0.8117 (ILWC42-ICCV2)                      | 0.6418  |
| <i>C. arietinum</i> - <i>C. pinnatifidum</i>     | 0.1131 (ICCV96329-BG2024)                       | 0.8307 (ILWC250-ICCV2)                     | 0.6651  |
| <i>C. arietinum</i> - <i>C. microphyllum</i>     | 0.1131 (ICCV96329-BG2024)                       | 0.7828 ( <i>microphyllum</i> -ICCV96970)   | 0.4362  |
| <i>C. reticulatum</i> - <i>C. echinospermum</i>  | 0.1859 (ILWC288-ICC17159)                       | 0.7546 (ILWC245-ICC17160)                  | 0.6468  |
| <i>C. reticulatum</i> - <i>C. judaicum</i>       | 0.1286 (ILWC211-ILWC20)                         | 0.9441 (ILWC283-ICC17160)                  | 0.6767  |
| <i>C. reticulatum</i> - <i>C. bijugum</i>        | 0.1336 (ILWC8-ILWC240)                          | 0.7878 (ILWC285-ICC17160)                  | 0.6387  |
| <i>C. reticulatum</i> - <i>C. pinnatifidum</i>   | 0.1504 (ILWC248-ILWC226)                        | 0.7965 (IG136820-ICC17160)                 | 0.6724  |
| <i>C. reticulatum</i> - <i>C. microphyllum</i>   | 0.2149 (ILWC229-ILWC219)                        | 0.8602 ( <i>microphyllum</i> -ILWC36)      | 0.6543  |
| <i>C. echinospermum</i> - <i>C. judaicum</i>     | 0.1286 (ILWC211-ILWC20)                         | 0.8486 (ILWC38-ILWC283)                    | 0.61    |
| <i>C. echinospermum</i> - <i>C. bijugum</i>      | 0.1336 (ILWC8-ILWC240)                          | 0.6265 (ILWC32-IG135418)                   | 0.5443  |
| <i>C. echinospermum</i> - <i>C. pinnatifidum</i> | 0.1504 (ILWC248-ILWC226)                        | 0.6803 (ILWC246-ILWC250)                   | 0.5863  |
| <i>C. echinospermum</i> - <i>C. microphyllum</i> | 0.1859 (ILWC288-ICC17159)                       | 0.8658 ( <i>microphyllum</i> -ILWC288)     | 0.5803  |
| <i>C. judaicum</i> - <i>C. bijugum</i>           | 0.1286 (ILWC211-ILWC20)                         | 0.8933 (ILWC32-ILWC283)                    | 0.5862  |
| <i>C. judaicum</i> - <i>C. pinnatifidum</i>      | 0.1286 (ILWC20-ILWC211)                         | 0.8857 (ILWC22-ILWC283)                    | 0.6151  |
| <i>C. judaicum</i> - <i>C. microphyllum</i>      | 0.1286 (ILWC211-ILWC20)                         | 0.9289 ( <i>microphyllum</i> -ILWC283)     | 0.6076  |
| <i>C. bijugum</i> - <i>C. pinnatifidum</i>       | 0.1336 (ILWC8-ILWC240)                          | 0.6313 (ILWC49-ILWC228)                    | 0.6473  |
| <i>C. bijugum</i> - <i>C. microphyllum</i>       | 0.1336 (ILWC8-ILWC240)                          | 0.8782 (ILWC277- <i>microphyllum</i> )     | 0.6018  |
| <i>C. pinnatifidum</i> - <i>C. microphyllum</i>  | 0.1504 (ILWC248-ILWC226)                        | 0.8192 ( <i>microphyllum</i> -ILWC49)      | 0.6375  |
