# Supplementary material for: Natural Allelic Diversity, Genetic Structure and Linkage Disequilibrium Pattern in Wild Chickpea
Source: PubMed Central journal article supplement (PMC4164632; doi:10.1371/journal.pone.0107484), 2014-09-15
Supplement: pone.0107484.s013.pdf [file pone.0107484.s013.pdf]

**Table S6: Pair-wise estimates of genetic divergence ( $F_{ST}$ ) and genetic distance among six model-based population groups**

| <b>Populations</b> | <b>POP I</b> | <b>POP II</b> | <b>POP III</b> | <b>POP IV</b> | <b>POP V</b> | <b>POP VI</b> |
|--------------------|--------------|---------------|----------------|---------------|--------------|---------------|
| <b>POP I</b>       | -            | 0.53          | 0.46           | 0.67          | 0.65         | 0.89          |
| <b>POP II</b>      | 0.54         | -             | 0.23           | 0.39          | 0.49         | 0.42          |
| <b>POP III</b>     | 0.61         | 0.31          | -              | 0.48          | 0.54         | 0.75          |
| <b>POP IV</b>      | 0.68         | 0.52          | 0.47           | -             | 0.79         | 0.69          |
| <b>POP V</b>       | 0.78         | 0.61          | 0.58           | 0.65          | -            | 0.83          |
| <b>POP VI</b>      | 0.86         | 0.58          | 0.49           | 0.59          | 0.72         | -             |

Pair-wise  $F_{ST}$  estimates are mentioned above the diagonal and genetic distance provided below the diagonal
