# Supplementary material for: Natural Allelic Diversity, Genetic Structure and Linkage Disequilibrium Pattern in Wild Chickpea
Source: PubMed Central journal article supplement (PMC4164632; doi:10.1371/journal.pone.0107484), 2014-09-15
Supplement: pone.0107484.s014.pdf [file pone.0107484.s014.pdf]

**Table S7: LD estimates in six model-based individual population groups and entire population as well as across eight chromosomes**

| Population groups              | Global                      |                                                       |                                 |                        | Linked                                   |                    |                        | Unlinked                                 |                    |                        |
|--------------------------------|-----------------------------|-------------------------------------------------------|---------------------------------|------------------------|------------------------------------------|--------------------|------------------------|------------------------------------------|--------------------|------------------------|
|                                | Number of marker-pairs used | <sup>a</sup> Number of significant marker-pairs in LD | <sup>b</sup> Significant LD (%) | Extent of LD ( $r^2$ ) | Number of significant marker-pairs in LD | Significant LD (%) | Extent of LD ( $r^2$ ) | Number of significant marker-pairs in LD | Significant LD (%) | Extent of LD ( $r^2$ ) |
| <b>POP I</b>                   | 384117                      | 949                                                   | 2.47                            | 0.25                   | 179383                                   | 46.7               | 0.30                   | 8182                                     | 2.13               | 0.22                   |
| <b>POP II</b>                  | 384123                      | 30768                                                 | 80.1                            | 0.20                   | 337260                                   | 87.8               | 0.28                   | 264661                                   | 68.9               | 0.18                   |
| <b>POP III</b>                 | 384117                      | 6876                                                  | 1.79                            | 0.27                   | 158640                                   | 41.3               | 0.33                   | 6261                                     | 1.63               | 0.25                   |
| <b>POP IV</b>                  | 384108                      | 14673                                                 | 3.82                            | 0.25                   | 213948                                   | 55.7               | 0.27                   | 13636                                    | 3.55               | 0.23                   |
| <b>POP V</b>                   | 384122                      | 6148                                                  | 1.61                            | 0.23                   | 149423                                   | 38.9               | 0.28                   | 5839                                     | 1.52               | 0.21                   |
| <b>POP VI</b>                  | 384098                      | 5531                                                  | 1.44                            | 0.19                   | 128673                                   | 33.5               | 0.25                   | 5070                                     | 1.32               | 0.17                   |
| <b>Total population groups</b> | 384126                      | 64572                                                 | 16.81                           | 0.22                   | 163638                                   | 42.6               | 0.30                   | 54277                                    | 14.13              | 0.20                   |

| Chromosomes              | Linked                      |                                          |                    |                        |
|--------------------------|-----------------------------|------------------------------------------|--------------------|------------------------|
|                          | Number of marker-pairs used | Number of significant marker-pairs in LD | Significant LD (%) | Extent of LD ( $r^2$ ) |
| <b>CaChr01</b>           | 5229                        | 4983                                     | 95.3               | 0.26                   |
| <b>CaChr02</b>           | 4679                        | 4464                                     | 95.4               | 0.28                   |
| <b>CaChr03</b>           | 7064                        | 5658                                     | 80.1               | 0.31                   |
| <b>CaChr04</b>           | 5229                        | 5198                                     | 99.4               | 0.28                   |
| <b>CaChr05</b>           | 7064                        | 6054                                     | 85.7               | 0.30                   |
| <b>CaChr06</b>           | 6422                        | 4373                                     | 68.1               | 0.27                   |
| <b>CaChr07</b>           | 5810                        | 5595                                     | 96.3               | 0.40                   |
| <b>CaChr08</b>           | 4679                        | 3977                                     | 85.0               | 0.29                   |
| <b>Total chromosomes</b> | 5089                        | 4361                                     | 85.6               | 0.31                   |

<sup>a</sup>Percentage of microsatellite and SNP marker locus-pairs in significant ( $P < 0.001$ ) LD

<sup>b</sup>Significant threshold ( $P < 0.001$ ) at which pair-wise LD estimates is significant statistically
