# Supplementary material for: Natural Allelic Diversity, Genetic Structure and Linkage Disequilibrium Pattern in Wild Chickpea
Source: PLoS One. 2014 Sep 15;9(9):e107484. doi: 10.1371/journal.pone.0107484 (PMC4164632; doi:10.1371/journal.pone.0107484)
Supplement: Table S3 — Summary of 384 TF gene-derived SNPs genotyped in 94 annual/perennial cultivated and wild Cicer accessions using high-throughput MALDI-TOF mass array. (PDF) [file pone.0107484.s010.pdf]

Table S3: Summary of 384 TF gene-derived SNPs genotyped in 94 annual/perennial cultivated and wild *Cicer* accessions using high-throughput MALDI-TOF mass array

| SNP IDs*   | 1st Pre-PCR primer sequence       | 2nd Pre-PCR primer sequence         | Unextended Primer sequence   | SNP allele (ICC 4958) | SNP allele (ICC 17160) | Size (bp) of alleles amplified | Actual annealing temperature (°C) | Chromosomes | Physical positions (bp) | Transcription factors (TFs) |
|------------|-----------------------------------|-------------------------------------|------------------------------|-----------------------|------------------------|--------------------------------|-----------------------------------|-------------|-------------------------|-----------------------------|
| CaTFSPN1   | acgttggatgTCCCAACAAGGAAGCTAGTG    | acgttggatgTCAGGTTCCTCTTCTAGTTGC     | AGCGTTCTTACGAGGACCTTCATTA    | C                     | T                      | 98                             | 49.1                              | CaChr1      | 1661476                 | GeBP                        |
| CaTFSPN2   | acgttggatgTCAACAAGACAGTTCGAAGCA   | acgttggatgCATCAGCGTGTCTTTTGAGG      | GTTCGGAAGACAGGATGTAC         | T                     | C                      | 108                            | 59.62                             | CaChr1      | 1827593                 | Jumonji                     |
| CaTFSPN3   | acgttggatgCACTGGAGGTGTGCTTTTCA    | acgttggatgTTCGCCAACAGAACCAAC        | CCCCAACAGAACCAACTGAA         | G                     | A                      | 199                            | 59.87                             | CaChr1      | 2188544                 | SNF2                        |
| CaTFSPN4   | acgttggatgTGATTCCTCCAGCTTTTGACC   | acgttggatgAAAGGTGGGGTGAGGAAAG       | AAACCCCTTCCTTCATCTTCATCATC   | A                     | T                      | 158                            | 60.2                              | CaChr1      | 2602506                 | SBP                         |
| CaTFSPN5   | acgttggatgGAGGAGGAAGTAGAAACAATAGA | acgttggatgTCCCTCTCTCCTCTTCT         | AGAGGAGGAGGTAGAAACAATAGA     | G                     | A                      | 101                            | 53.77                             | CaChr1      | 2631901                 | C3H                         |
| CaTFSPN6   | acgttggatgTGACTGCCAAGGAACCTCAA    | acgttggatgTCCCTCTCTGTCATGTATTCAG    | GGATTCTGTCCAAAAGAAAC         | G                     | C                      | 115                            | 59.41                             | CaChr1      | 3650162                 | MADS                        |
| CaTFSPN7   | acgttggatgAAAGGCAAGCATCAGGGAAT    | acgttggatgTGCTAAATCTCATGGGATGA      | GCCAAATGAAATAAAGCGCAGAA      | G                     | A                      | 201                            | 59.9                              | CaChr1      | 3734533                 | Bromodomain                 |
| CaTFSPN8   | acgttggatgGCCTTGCTCTGCCCTAATCT    | acgttggatgTTGTGAAGAGGGGTTTGG        | TGCTCTGCCCTAATCTCAAC         | G                     | C                      | 109                            | 60.87                             | CaChr1      | 4325063                 | mTERF                       |
| CaTFSPN9   | acgttggatgCCCCCTCTCAAGTTTITGA     | acgttggatgTTTGATCATGGAGCGGAA        | CATAATCATTTAGTTCCTGTATCTTCT  | T                     | C                      | 197                            | 59.9                              | CaChr1      | 4379384                 | SNF2                        |
| CaTFSPN10  | acgttggatgGGGTGTGTGTCGCTGAAT      | acgttggatgTCTTTGGACGATTCACGTCT      | CATCTAATGTTGCTGTAACTGTGAGT   | G                     | T                      | 228                            | 59.97                             | CaChr1      | 4866342                 | BSD                         |
| CaTFSPN11  | acgttggatgGCAACCTCTTATTATTAAT     | acgttggatgCCATTTAGTAGATTTCATC       | CATATAATATTATCTCTAAAATGCAAG  | C                     | G                      | 109                            | 46                                | CaChr1      | 5452945                 | MYB-related                 |
| CaTFSPN12# | acgttggatgCAAGGAACCAAGGAAGAAAGG   | acgttggatgGGTGCTCATGGAAACAACAA      | GAAAACTACTAATTGTATTTCTGCTG   | T                     | C                      | 103                            | 59.28                             | CaChr1      | 5666051                 | WRKY                        |
| CaTFSPN13  | acgttggatgCCCGTGAAACCTGGGATTTA    | acgttggatgAGTCACCCGAACAAATCGTC      | CCTGGGCATACTACCTCGTA         | G                     | A                      | 206                            | 59.79                             | CaChr1      | 6592726                 | FHA                         |
| CaTFSPN14  | acgttggatgGGTGCCAAAGTTGCTTCAAT    | acgttggatgGGATCGATGTTCAAAGGGTTGC    | TTGAGAACTGAGTCTCCGCG         | A                     | T                      | 199                            | 60.12                             | CaChr1      | 7417345                 | HB                          |
| CaTFSPN15  | acgttggatgATCCCAATGGCCAACTCTCGAC  | acgttggatgAAATGTGCGAGACTCGTGCAA     | TGCAGGTGTTCCTTTGCC           | G                     | A                      | 199                            | 59.89                             | CaChr1      | 7436472                 | CCAAT                       |
| CaTFSPN16  | acgttggatgTGTCATGCAACCTAAACACCA   | acgttggatgGTTACTTCCAAACCGGCACAT     | TTTGGTATACAAAGTTTCAACCTATCTC | G                     | C                      | 206                            | 60.02                             | CaChr1      | 8284578                 | MYB-related                 |
| CaTFSPN17  | acgttggatgCTCCGAAATACAGAACCCAT    | acgttggatgAGTACAGCCCTTTACTTCGC      | CGAGACCCCTTTAAACC            | A                     | A                      | 100                            | 46.3                              | CaChr1      | 9654075                 | Trihelix                    |
| CaTFSPN18  | acgttggatgGAGTCTGCAACCCGCAATTT    | acgttggatgTGGCAATGATGACATGATGA      | GATGATCTTGTGACAAATACC        | G                     | C                      | 117                            | 60.26                             | CaChr1      | 10455472                | MYB                         |
| CaTFSPN19  | acgttggatgACCTTGTGCTGCTGATTTCT    | acgttggatgGATGGAGGGTGGTGGCTTGA      | TGAATTCAAATTCGAATAACTCC      | G                     | A                      | 115                            | 59.87                             | CaChr1      | 11285630                | GRAS                        |
| CaTFSPN20  | acgttggatgGGGAGCTGTGAGGATTTGA     | acgttggatgGTACTGCTTCCCGGTACAA       | GGATGGAGCGAAACAGAGTGT        | G                     | A                      | 197                            | 60.2                              | CaChr1      | 12530205                | AP2-EREBP                   |
| CaTFSPN21  | acgttggatgCACTGCAAGTAGACACTACACA  | acgttggatgGGAAGCTGGCAAGAGAAGA       | ACAAAAAAGTACACTTCACATAA      | C                     | C                      | 110                            | 60.16                             | CaChr1      | 12928919                | G2-like                     |
| CaTFSPN22  | acgttggatgATTTCGCCAATGCGCTGGTGT   | acgttggatgAAAGTTCAGGCGCGCACAAG      | CCATACATTCGCCCTTGC           | T                     | T                      | 102                            | 48.6                              | CaChr1      | 13679988                | AP2-EREBP                   |
| CaTFSPN23  | acgttggatgTCTGCTGGTTCATCGCTTGG    | acgttggatgTGTTCGTGTGAGCAATCCAA      | GCTCTATGATTGTGATTTGA         | T                     | C                      | 118                            | 59.83                             | CaChr1      | 13801427                | bHLH                        |
| CaTFSPN24  | acgttggatgTTGTCTGCTGAAGTTGCTTGA   | acgttggatgCCCGAACCTTAATCTCTCTCA     | CCTAAGTTCCTACACCTCCTC        | T                     | C                      | 203                            | 59.47                             | CaChr1      | 13994815                | HB                          |
| CaTFSPN25  | acgttggatgCATTTCCGAGAGAAAGGAGGA   | acgttggatgTGCTTCAAGTCTGTAACCTC      | CCAACTAATTAAGTGGATAAGGC      | A                     | C                      | 178                            | 59.36                             | CaChr1      | 15378650                | bHLH                        |
| CaTFSPN26  | acgttggatgACTGCGCAATCCGAGGATCT    | acgttggatgCGATTTCATCTTCCCTCCCTCA    | CGCTTCTTGAAGCCCGAT           | A                     | C                      | 201                            | 60.88                             | CaChr1      | 15606770                | WRKY                        |
| CaTFSPN27  | acgttggatgGCACCGCATGATAACGAATG    | acgttggatgTCTCTCAACCTTTCGTGTTT      | GGGCGAGAGGTGTCAGAGAGAC       | G                     | T                      | 200                            | 59.96                             | CaChr1      | 16080907                | GRAS                        |
| CaTFSPN28  | acgttggatgAGCTTTCCCAATACCCAGATCC  | acgttggatgCGCAAGTAGCTGGTGCATCA      | TTGAGTCCCAAGATAGGAAGTATCC    | T                     | C                      | 192                            | 59.43                             | CaChr1      | 16680465                | NAC                         |
| CaTFSPN29  | acgttggatgGATGAGGCTTGCTCAATTTC    | acgttggatgTCTTTCAATCGCGGTTGGTG      | AATGCGCTTGTGGTATATTACTAGC    | T                     | C                      | 105                            | 54.2                              | CaChr1      | 17405553                | CAMTA                       |
| CaTFSPN30  | acgttggatgGGGGGCTAGCTCGGAGAGAA    | acgttggatgTGGCATGTGCAAGATTGAGT      | AAACATAGTATCAACGACTACAAATGGA | A                     | C                      | 209                            | 60.73                             | CaChr1      | 18460430                | mTERF                       |
| CaTFSPN31  | acgttggatgAGGAGAAACCAACAGGCTGT    | acgttggatgGGCACTCTTCTCTCCGAGA       | GGCGAGAGCAATGCAAGTATTA       | T                     | C                      | 211                            | 60.11                             | CaChr1      | 20598392                | C3H                         |
| CaTFSPN32  | acgttggatgACCTTTCTCGTGTCTCTGAGC   | acgttggatgAAATCGAAGCTAGCCTAAGC      | CGGGCAAGAAAGTCAATTTGTCTCA    | C                     | A                      | 107                            | 52.8                              | CaChr1      | 21135977                | MADS                        |
| CaTFSPN33  | acgttggatgTGCAGATCTCGTAATCTGAG    | acgttggatgAAATGGGTGCGGAAATCAG       | CGGGAAATTAACATTAGCACCCAC     | T                     | C                      | 204                            | 60.1                              | CaChr1      | 23850218                | AP2-EREBP                   |
| CaTFSPN34  | acgttggatgTTTGCGAATGCAAGTCTCA     | acgttggatgAAGCCTAATCAACCACTATCAGC   | CCATTAAAAAGCAGTGTGCTGA       | G                     | A                      | 188                            | 58.05                             | CaChr1      | 24068638                | ARF                         |
| CaTFSPN35  | acgttggatgTGGCTAAACCTGTTGCCCTC    | acgttggatgGAACCCCAACAAATGGATCAC     | GGGGAAAATGGATCACAAGAAAGTC    | T                     | C                      | 86                             | 45.3                              | CaChr1      | 25186105                | Tify                        |
| CaTFSPN36  | acgttggatgCCGTTTGAATGCAATTTGGA    | acgttggatgGAGGAGGAAGACACATCCTGA     | GACACATCTCATGCTGCTGT         | A                     | C                      | 120                            | 59.38                             | CaChr1      | 26026317                | SBP                         |
| CaTFSPN37  | acgttggatgCTTCCAGATGTTCCAGAGTGT   | acgttggatgTAAGCGTAGCTGTGCGCAAC      | TGACGCCGGAAGAAAGC            | C                     | T                      | 107                            | 50.1                              | CaChr1      | 33623744                | SBP                         |
| CaTFSPN38  | acgttggatgAGAGGTGGTGAACCAATTC     | acgttggatgTGTGGAACCTCAAGGAATGC      | CCGCGCAAGAAATATGGCACT        | T                     | T                      | 83                             | 48                                | CaChr1      | 37691837                | G2-like                     |
| CaTFSPN39  | acgttggatgCAATTTTGTCTTATGGGTC     | acgttggatgCTTGACCTTAACGTTCTCTCC     | CCTGAAGTGTCTGATGCTG          | G                     | T                      | 95                             | 48.6                              | CaChr1      | 41981594                | AP2-EREBP                   |
| CaTFSPN40  | acgttggatgGAGGAAAGGTTGAGGAGCA     | acgttggatgTGGGTATTCTTCTCATTTTTG     | CCCTTATCATGTGATAGAAAAAGT     | G                     | C                      | 119                            | 59.69                             | CaChr1      | 43957759                | NAC                         |
| CaTFSPN41  | acgttggatgGGCTTTTCTCCTATTCTCG     | acgttggatgCCATGAATCTGGTTCAGGC       | GAGGGCTCTAGTTTGAA            | C                     | G                      | 95                             | 45.5                              | CaChr1      | 46718906                | mTERF                       |
| CaTFSPN42  | acgttggatgGAAACCTGCTTATTTGACCA    | acgttggatgGAACCAATGCAATTCGTACAG     | TGTTTCAATACATGCAACTAGATAT    | T                     | C                      | 98                             | 59.3                              | CaChr1      | 48002347                | PHD                         |
| CaTFSPN43  | acgttggatgCGCAGCAGTACACCATAC      | acgttggatgGAAGCGAAGAAATTTGGAGCA     | GACGAAAGCAATTTGGAGAAATC      | C                     | A                      | 184                            | 59.52                             | CaChr1      | 48218880                | Alfin-like                  |
| CaTFSPN44  | acgttggatgATTCTCTGATTTCTCTCGG     | acgttggatgAATGATGTCTCGAGGAAGGC      | GGGCGGAGGAAGGCAATAGAGTCACT   | C                     | A                      | 101                            | 54.3                              | CaChr1      | 48249846                | bZIP                        |
| CaTFSPN45  | acgttggatgTCTCTCTTTCCGACAGCTGG    | acgttggatgGCCAATAACTTCGGAAGCAG      | GAGTCGGAAGCAGCTGCTCA         | G                     | A                      | 103                            | 51.5                              | CaChr2      | 355965                  | LOB                         |
| CaTFSPN46  | acgttggatgCCAAGGCCAAAATTTCTGTT    | acgttggatgTCATGGAGCAATGGAAGTGA      | GCATTGAAGTAGTTGTGTCATGCT     | A                     | T                      | 231                            | 59.06                             | CaChr2      | 3202163                 | HB                          |
| CaTFSPN47  | acgttggatgATTGACCTTTTGGCCTTCC     | acgttggatgCAACCAACATGATGATGGC       | CCATTGATGGCAAAAAAGCACTTAG    | G                     | A                      | 112                            | 54.5                              | CaChr2      | 3353616                 | MYB                         |
| CaTFSPN48  | acgttggatgCATGCAAGTAACTGTGGAGGT   | acgttggatgCAACCAAGAGCAGACAAAT       | CTAATGTGGAGGTGATGCT          | G                     | A                      | 104                            | 60.15                             | CaChr2      | 3410435                 | zf-HD                       |
| CaTFSPN49  | acgttggatgTTTATGATGCGTGCAACCTT    | acgttggatgGCTCTGCTGCAATCAGGT        | AAAGTCATCTGTATTTCAGAACCCCTC  | A                     | C                      | 199                            | 59.19                             | CaChr2      | 4324332                 | SAP                         |
| CaTFSPN50  | acgttggatgGAGGGGAAACAAATCTGGAA    | acgttggatgCCTTTTCCACTCCCTCTTTCT     | TGTTATTTCTGCTCATTACGGTTG     | A                     | T                      | 199                            | 59.77                             | CaChr2      | 5886240                 | PHD                         |
| CaTFSPN51  | acgttggatgAGAGGAAAGGTTGGGTTTG     | acgttggatgTCTCAACATGCGTTTCCAG       | ACATTATGACGAGAACTGGCAT       | T                     | C                      | 200                            | 59.78                             | CaChr2      | 6181000                 | SET                         |
| CaTFSPN52  | acgttggatgGGGTGTCCATTCAAGATTACG   | acgttggatgGGTGTGAAACCCACAACAG       | TCACCTATTCTTACGGG            | C                     | T                      | 102                            | 46.3                              | CaChr2      | 6743024                 | FAR1                        |
| CaTFSPN53  | acgttggatgGGCTTCAATCTTCGAGCAG     | acgttggatgTTTCTTGAGGACCATCACTG      | CAAAAACGTTGGTGTG             | G                     | A                      | 116                            | 60.1                              | CaChr2      | 9152974                 | bHLH                        |
| CaTFSPN54  | acgttggatgAGTAGGCGAAGGAGAGAGAG    | acgttggatgGAAGAAATGCATTGGCGGG       | ATTTGGCGGAACTGT              | T                     | C                      | 98                             | 49.2                              | CaChr2      | 9266035                 | GNAT                        |
| CaTFSPN55  | acgttggatgAACGCCCTTAAACGGAATCCT   | acgttggatgCTTCCAACAGGCATTCCTAT      | GTGAACCATGGCTGGAAAG          | C                     | T                      | 203                            | 59.97                             | CaChr2      | 10330226                | bHLH                        |
| CaTFSPN56  | acgttggatgCCATGAGTGTGCTCATGAG     | acgttggatgTTTCAATCTCTCGCTGCC        | CCGCCCTTTACAAATCCACAAAA      | G                     | A                      | 85                             | 46.8                              | CaChr2      | 14248647                | GNAT                        |
| CaTFSPN57  | acgttggatgGCAACCTCTCTTTCTCACCC    | acgttggatgTGTAACCTCCCTGGAGAGTG      | AGCGACTAGAGTATGATTTTGGAAAGT  | G                     | A                      | 107                            | 51                                | CaChr2      | 15817338                | C2C2-YABBY                  |
| CaTFSPN58  | acgttggatgTTGGCTCTCTTCCAGTTTG     | acgttggatgTCGAATCTTCAATACAAAACATACC | CTCTCACTTTGTATTTCAAGA        | G                     | A                      | 84                             | 60.37                             | CaChr2      | 16132823                | SBP                         |
| CaTFSPN59  | acgttggatgCCGGCATGTTAGACCTCGTT    | acgttggatgTTGTCATGGCCCCATTAATTT     | TGAGAGAAAGATGAAACATGACAAAT   | C                     | G                      | 188                            | 60.13                             | CaChr2      | 16353473                | GeBP                        |
| CaTFSPN60  | acgttggatgTCCCTCTTCCCAACAAATCCC   | acgttggatgCCTTCGTTTCAAGGATTTGG      | GCTTGGAGAGGCTGTTGT           | T                     | C                      | 92                             | 53.5                              | CaChr2      | 18418063                | GNAT                        |
| CaTFSPN61  | acgttggatgGATGCTGGACGAAATCATCA    | acgttggatgTGAAATCATCCGTTGGTTGAGA    | ATCTAGTGCAGATGAAGGACC        | C                     | G                      | 225                            | 59.61                             | CaChr2      | 18878024                | bHLH                        |
| CaTFSPN62  | acgttggatgCGGCGAATTTTGAACCTGAG    | acgttggatgGAGATTCAGAGGATCAAC        | AGGCATCAACTCCGGT             | C                     | G                      | 99                             | 50.9                              | CaChr2      | 21714168                | zf-HD                       |
| CaTFSPN63  | acgttggatgTGCAATAGCCACCGTCATCTA   | acgttggatgAGGCTGAGGGTGGAGGTACT      | TGCGAATCAACTTCCATATCAA       | T                     | C                      | 210                            | 60.24                             | CaChr2      | 24236619                | Alfin-like                  |
| CaTFSPN64  | acgttggatgATTGGCCCTCTGCTCTCTT     | acgttggatgGGCATGCTGACATGATAGA       | TTCTTCTCTCTCTATGTGATCTCT     | C                     | C                      | 202                            | 60.07                             | CaChr2      | 25291561                | C3H                         |
| CaTFSPN65  | acgttggatgGAGGGAAGGTTTGTAGTTGT    | acgttggatgTCTCCAGGACCAAAAGGTC       | GTGGTGGTGGAGTTGGTGT          | T                     | C                      | 207                            | 60.17                             | CaChr2      | 26158345                | FHA                         |
| CaTFSPN66  | acgttggatgGCCTCTGATTAAGTTAGCTGT   | acgttggatgCGAGACTGTGCAATTTGCAAG     | TCTCATTTCTTAGCAGTTTGGG       | A                     | G                      | 98                             | 50.7                              | CaChr2      | 27361120                | bZIP                        |
| CaTFSPN67  | acgttggatgAACCAACCTCTTCTCTCTTCA   | acgttggatgCCAGCTCTCAGCTTCTTGAAGC    | GCTCTGTGAAAGACATGGTAGAGAGA   | G                     | C                      | 194                            | 60.01                             | CaChr2      | 27694185                | AP2-EREBP                   |
| CaTFSPN68  | acgttggatgTTGGAAATCAGAGTGCATGA    | acgttggatgGATGAAAGTTTGGGGTTTCCG     | CCTTTATTGAAAGTCTCTAGAAGCC    | G                     | A                      | 89                             | 58.62                             | CaChr2      | 30377757                | MYB                         |
| CaTFSPN69  | acgttggatgTAGCATGCGAACCTTCTTCC    | acgttggatgTTTAGGAGATGCCCAACGAG      | TCTTGAGAGTGAGATGATGATGC      | G                     | A                      | 200                            | 59.27                             | CaChr2      | 30698052                | HMG                         |
| CaTFSPN70  | acgttggatgAGTCCGCTGATTTGAGATAG    | acgttggatgGGAGCAAGGAATTCACACAGG     | GGGGCTTTGAATCCAACAAACCTTGA   | C                     | T                      | 120                            | 49                                | CaChr2      | 30867757                | C3H                         |
| CaTFSPN71  | acgttggatgTCAAATGTGTTTGGGCGAGA    | acgttggatgCAGAGCCCAACCAAGGAAGC      | TATCCAGTGAATGGAGCAAA         | G                     | A                      | 203                            | 60.09                             | CaChr2      | 32769483                | FAR1                        |
| CaTFSPN72  | acgttggatgAAAGTGTGCTGCTCGTGGT     | acgttggatgGCTGAAGCCTATGACATCA       | CATCAAACTTAGTCAATATGTACC     | C                     | C                      | 117                            | 59.91                             | CaChr2      | 32958106                | bZIP                        |
| CaTFSPN73  | acgttggatgCAAGTACGCTGCAACAGCAGT   | acgttggatgCTCCACCTTAAATGAAGCTCAG    | AAACATGCTCCCACTCACTTCA       | A                     | C                      | 197                            | 59.97                             | CaChr2      | 33604180                | SRS                         |
| CaTFSPN74  | acgttggatgGCACGCTTATGCGAGGATGAA   | acgttggatgGCACCAACCAAGCAAAATGG      | CGAGGATGAACTGCCGA            | T                     | C                      | 215                            | 60.48                             | CaChr2      | 33661127                | HB                          |
| CaTFSPN75  | acgttggatgATAGCTCTGCCACTGACC      | acgttggatgTTCAGATAGGATCAGCCAAAG     | CGCCCAAGATAATTGGCAATGTT      | T                     | C                      | 91                             | 52.5                              | CaChr2      | 33727257                | SNF2                        |
| CaTFSPN76  | acgttggatgACGAGCAAGAGGTGGAGAAGA   | acgttggatgTCCGTGGCTTTCGAAAAATC      | TCCTATATTTTCTCCTCTTAGGCA     | T                     | C                      | 202                            | 59.84                             | CaChr2      | 34132454                | NAC                         |
| CaTFSPN77  | acgttggatgGAGGCTCGGAGCCTACCTGAT   | acgttggatgTTCCCTCTCAGCATCTGACC      | CATCTATGTTGTGTTTCTCTCTGCTACT | G                     | T                      | 199                            | 59.83                             | CaChr2      | 34853120                | Bromodomain                 |
| CaTFSPN78  | acgttggatgGGTCAAGGATTGACCTTCAG    | acgttggatgCGAAACACCTCTAGCTTCTC      | TGTGAAGTTCTATTACCAAGTACAA    | A                     | A                      | 209                            | 59.93                             | CaChr2      | 35412866                | mTERF                       |
| CaTFSPN79  | acgttggatgTCTGTGAACAGGACCGATT     | acgttggatgATCGTCTCGGTGATCGTCT       | AAGATCTCGAAAGACGCGAA         | G                     | A                      | 197                            | 60.11                             | CaChr2      | 35556870                | CCAAT                       |

| SNP IDs*   | 1st Pre-PCR primer sequence      | 2nd Pre-PCR primer sequence       | Unextended Primer sequence     | SNP allele (CC 4958) | SNP allele (CC 17160) | Size (bp) of alleles amplified | Actual annealing temperature (OC) | Chromosomes | Physical positions (bp) | Transcription factors (TFs) |
|------------|----------------------------------|-----------------------------------|--------------------------------|----------------------|-----------------------|--------------------------------|-----------------------------------|-------------|-------------------------|-----------------------------|
| CaTFSPN80  | acgttgatgTGCAGGCATCAGAACAACAT    | acgttgatgTTGTAAACGGCGAAACTTCC     | TTTACTGCACGTGGAAATCATC         | G                    | A                     | 214                            | 60.27                             | CaChr2      | 36087743                | GRAS                        |
| CaTFSPN81  | acgttgatgACGAGGCACATAGCTCCAAAG   | acgttgatgCTAAGGGATGCCCAATTGCT     | ATCAGAGATTGTTGCATTATTTCTTG     | G                    | A                     | 193                            | 60.42                             | CaChr2      | 36337365                | GNAT                        |
| CaTFSPN82  | acgttgatgACCGAAGACTCCAACTCG      | acgttgatgCACATTTTCTCTCAAGTTTCC    | GGCCTCAAGTTTCTCTAATTTGAAGC     | G                    | T                     | 111                            | 50.9                              | CaChr2      | 36520110                | FAR1                        |
| CaTFSPN83  | acgttgatgGGCTTTCCCTGTATGCTACCC   | acgttgatgTCTCCAATGGACAGAGAAGC     | CTCCAATGGACAGAGAAGCAAGAGTC     | C                    | T                     | 116                            | 57.3                              | CaChr3      | 2706867                 | C2C2-CO-like                |
| CaTFSPN84  | acgttgatgACCATAGACTGCGGGTCAC     | acgttgatgGGCATCGGCTTTACAAAGAA     | TTTTGCCGCGCAGACT               | T                    | C                     | 213                            | 60.00                             | CaChr3      | 2709320                 | C2C2-CO-like                |
| CaTFSPN85  | acgttgatgTGTCTTTTCCCAACGGTGTTC   | acgttgatgGGCGCATTTTATGGAAAGTTG    | CACCACCTTACAACACCACCAC         | A                    | C                     | 197                            | 60.00                             | CaChr3      | 3617757                 | zf-HD                       |
| CaTFSPN86# | acgttgatgGGCTACAGGTGGCGAAGATA    | acgttgatgGTGTTTGTGGCTGCTGTGCT     | AACATGTTCGAGAGAGCATCAAC        | A                    | C                     | 200                            | 60.27                             | CaChr3      | 4823888                 | WRKY                        |
| CaTFSPN87  | acgttgatgCGGAGTGAAGCTTCTCTATC    | acgttgatgGATGCCTCCTGAGACTAATG     | AAACTTAAGAGAGAAATGAAGATG       | C                    | A                     | 101                            | 47.2                              | CaChr3      | 7436178                 | FHA                         |
| CaTFSPN88  | acgttgatgAAGAAGATACTGGCTGCTC     | acgttgatgGACCTCGATCGAAAGAGATG     | CCACTCTCCTCGGAC                | A                    | G                     | 100                            | 47.4                              | CaChr3      | 10493006                | PHD                         |
| CaTFSPN89  | acgttgatgAGGCAATTATGTCCTGAGC     | acgttgatgGCCGAATTCTGCAATATGG      | CTTTGCATTGTTTCAAGCCAAGATGTT    | G                    | T                     | 105                            | 50.6                              | CaChr3      | 14026885                | ARF                         |
| CaTFSPN90  | acgttgatgCTACCGATGGGCTGCGAAAT    | acgttgatgTCATGAGCTCCATGTGCTGC     | AAGGAAGCTGGAATCTTAAAGAAACA     | G                    | A                     | 202                            | 60.24                             | CaChr3      | 15739519                | FHA                         |
| CaTFSPN91  | acgttgatgGCTTTGGCTCAGTCACCTGT    | acgttgatgATTGCATACTAACTCAAAGACCTC | ATCTAGATTGAAGACAAAAGGATTTC     | G                    | A                     | 200                            | 60.45                             | CaChr3      | 17174233                | LUG                         |
| CaTFSPN92  | acgttgatgTAGCGTTTAAGGAACACCCG    | acgttgatgGCAATGCACAGTTACAGCG      | CAGTTACAGCGAAGAGAT             | C                    | T                     | 83                             | 46.5                              | CaChr3      | 17181273                | LUG                         |
| CaTFSPN93  | acgttgatgACCGGATAAACGACAGCAAG    | acgttgatgCGAAGGTGGCCTAATAGGTG     | TCTCTCTTTCACTAGTTTCTCGGC       | T                    | C                     | 200                            | 60.13                             | CaChr3      | 17936789                | MYB                         |
| CaTFSPN94  | acgttgatgGGAGGATTTGATGTCACCAT    | acgttgatgCAACCAAGGCTGAAATAGCC     | CATGAACCAATTTTCTTGGAACT        | G                    | A                     | 98                             | 59.64                             | CaChr3      | 20174631                | S1Fa-like                   |
| CaTFSPN95  | acgttgatgACCTAGGGTTTCCAAACAC     | acgttgatgTAAATCCCCCAATGCCATCC     | GTAAACCCTTAGAGATCAATCATCGAT    | T                    | A                     | 101                            | 52.7                              | CaChr3      | 20843598                | SAP                         |
| CaTFSPN96  | acgttgatgGCCAAGGTTGGCACCTTAAAG   | acgttgatgCACCACCTCTTGATGGTGCT     | TTGTTGAACGACCAACTATTATCAAG     | G                    | A                     | 227                            | 59.75                             | CaChr3      | 21776235                | GRAS                        |
| CaTFSPN97  | acgttgatgCACAAGGTTGTACTGACGAAA   | acgttgatgTCAAACTCCAGTCACGACAAA    | GGTTTGGGCAATTTGGCG             | G                    | C                     | 211                            | 60.75                             | CaChr3      | 22065431                | FHA                         |
| CaTFSPN98  | acgttgatgGCTGGGAGAGCGCTTAACTCT   | acgttgatgCACAGCCTGCTCCTCATTTT     | GCTGACACAGTTGTCATCTA           | T                    | C                     | 87                             | 59.81                             | CaChr3      | 23278789                | SNF2                        |
| CaTFSPN99  | acgttgatgAAGGGTCCACATATGCCAAG    | acgttgatgGGATCTGATCTGTTTCTTTC     | TGATCTGTTTCTTCAACTGTTTTTCT     | C                    | A                     | 111                            | 52.4                              | CaChr3      | 23622995                | WRKY                        |
| CaTFSPN100 | acgttgatgCGGCGCTGTGTAGGTTCTTC    | acgttgatgTGATAATGAAGGCTCCTTGG     | TGGGAAGGACTTGTGAGTC            | G                    | A                     | 102                            | 59.88                             | CaChr3      | 23898026                | C3H                         |
| CaTFSPN101 | acgttgatgGATTATAGCGTGTGGGAGGT    | acgttgatgAATGCAAAATGTCTGGCACA     | TGGGAGGTTGGCCGC                | A                    | A                     | 176                            | 59.82                             | CaChr3      | 24542187                | mTERF                       |
| CaTFSPN102 | acgttgatgCTCCTTCACATGGTGATG      | acgttgatgCCTTATCGGTTCCGAAATCA     | AGAATATAATCAGCAAGTGTGTAG       | C                    | A                     | 119                            | 59.24                             | CaChr3      | 25508396                | C2C2-CO-like                |
| CaTFSPN103 | acgttgatgTTGCTCCGGAACAACCTCTT    | acgttgatgAATCGAAGGATACGCCAATG     | CCGGATTTTCTTCTCCTCTAC          | G                    | A                     | 209                            | 59.85                             | CaChr3      | 25757540                | SET                         |
| CaTFSPN104 | acgttgatgCAGTGCTTAGCAATGACACG    | acgttgatgGCCCTATTCTCTCATGTC       | CCATGCTCTTTGGATAC              | C                    | T                     | 81                             | 46.1                              | CaChr3      | 26544003                | NAC                         |
| CaTFSPN105 | acgttgatgGAGGAATATGCTTCTTCCATTCC | acgttgatgTGGAAAGAGTAAATTTCCCCCTTA | CTCATGACTGAGTCACITCCA          | G                    | C                     | 116                            | 59.37                             | CaChr3      | 26593875                | C2C2-GATA                   |
| CaTFSPN106 | acgttgatgATGTTTCTTCCCTTGAC       | acgttgatgAATGGAGAGGCTAAGAGTGC     | TTAATCTCATTAACAGCTCAGAAATATGA  | G                    | C                     | 188                            | 60.17                             | CaChr3      | 28560960                | SAP                         |
| CaTFSPN107 | acgttgatgGAACCTGGGAGAGTCCAAACA   | acgttgatgGCACGTATGCCCTTTTCTCTC    | CACACAGATGATACAGAGACAAAAATC    | G                    | A                     | 197                            | 60.09                             | CaChr3      | 28615172                | bZIP                        |
| CaTFSPN108 | acgttgatgCCACATGAAGCAACGTTGAG    | acgttgatgTGCAATGTTTACGCTGGAAT     | GGTGCTCCTCTAGCCACCTT           | G                    | C                     | 235                            | 60.37                             | CaChr3      | 29843867                | bZIP                        |
| CaTFSPN109 | acgttgatgGAGAAAGGTGATGGAGGTCA    | acgttgatgCTCCCAATTCCTTCTTCTTTC    | GGGATGAGATTGAGGATCTTAGTAG      | T                    | C                     | 194                            | 60.05                             | CaChr3      | 30320095                | BSD                         |
| CaTFSPN110 | acgttgatgGGCATGCAAAATTTGAGCTTC   | acgttgatgGAAATTCGACGCTGCTAAAG     | GTAGCGTCTTCTTCAACCAAT          | C                    | A                     | 197                            | 60.73                             | CaChr3      | 30955375                | GNAT                        |
| CaTFSPN111 | acgttgatgCAAAATCACGAGGATGCTGA    | acgttgatgGGGTGAACCCAAGTATGGT      | GGTATAGTGTCCCAGGAAGATTG        | G                    | T                     | 197                            | 59.8                              | CaChr3      | 31359638                | Jumonji                     |
| CaTFSPN112 | acgttgatgATGGCTACGCGTCAAACTCAT   | acgttgatgTTGAGATGCTCTTAACCTCG     | CAGGACAGTATTTACCAACGCT         | A                    | C                     | 213                            | 59.56                             | CaChr3      | 31566643                | G2-like                     |
| CaTFSPN113 | acgttgatgCAGAGTTTCTGAGGTCAGC     | acgttgatgACCCCTGTGATCGACGATTC     | GGCCGATGACCTTGAGTT             | T                    | C                     | 99                             | 59.78                             | CaChr3      | 32898333                | S1Fa-like                   |
| CaTFSPN114 | acgttgatgGAAATCGTGTGTTGTGTGTC    | acgttgatgACGTGGCTATGCTTTCTGTGTC   | CGTCTGTCGTAACACACATGA          | G                    | T                     | 93                             | 51.6                              | CaChr3      | 32900447                | S1Fa-like                   |
| CaTFSPN115 | acgttgatgTGTGAGGTCACACGCGTTA     | acgttgatgCAAAAGTGCCTTTGTTTTCAGG   | AAAGAAGGGCTGAGGGGAAA           | T                    | C                     | 202                            | 60.3                              | CaChr3      | 33155717                | Sigma70-like                |
| CaTFSPN116 | acgttgatgTGAAGCATATTTGTCCCTTGG   | acgttgatgGGGAAGGGCTACTTCCAGAC     | CTGACTGCGATGTTTCTGTAGTTG       | G                    | C                     | 209                            | 59.95                             | CaChr3      | 34594243                | Alfin-like                  |
| CaTFSPN117 | acgttgatgGGCCTGTCAAAATCCCTTCT    | acgttgatgAAATGTCTGCAATCGTGGTG     | CTGCCCTCATAGTTACGACTCCT        | C                    | A                     | 201                            | 60.44                             | CaChr3      | 34848851                | C3H                         |
| CaTFSPN118 | acgttgatgTTGATGGAACCTGGGTTGAG    | acgttgatgAGCATCAAAACCTCTGCACC     | CTCTGCACCATCACA                | G                    | A                     | 100                            | 45.2                              | CaChr3      | 35935079                | Jumonji                     |
| CaTFSPN119 | acgttgatgTTTCTCATCTCGATGCTGT     | acgttgatgTTCCGCTTGATTTTCTTTTG     | ATCTCCTCTTAATTATTTCGATTTTATTTG | G                    | A                     | 202                            | 59.76                             | CaChr3      | 36809912                | bZIP                        |
| CaTFSPN120 | acgttgatgCTTCCACCAACCGTACTTCT    | acgttgatgTGTCCCAAAAGATCAGGAA      | GTTCGCCAAAGATCAGGAAAG          | T                    | T                     | 204                            | 59.45                             | CaChr3      | 37102025                | SBP                         |
| CaTFSPN121 | acgttgatgTOAACACCGCGATAAACAA     | acgttgatgCCTCAACATCCCAATCCTA      | TCAATCAATCAGATACCGTTTTTC       | C                    | A                     | 218                            | 60.11                             | CaChr3      | 38614598                | GeBP                        |
| CaTFSPN122 | acgttgatgTGCTCTTCTCAAAGCCAAGC    | acgttgatgTTATTTCCACAAGGGCCAGA     | CTACAGCGCGCAGAC                | T                    | C                     | 168                            | 60.8                              | CaChr3      | 38760068                | bZIP                        |
| CaTFSPN123 | acgttgatgAACTGGAGGAGCGGTAAAGA    | acgttgatgCATTGCGACGCTCCTCTTC      | TTCTTCCATTTTCAGTGATTTCG        | G                    | T                     | 181                            | 60.02                             | CaChr3      | 38914646                | mTERF                       |
| CaTFSPN124 | acgttgatgTAAGGACCACTTTTCATGCG    | acgttgatgGGAGAGACTGCATGATCAAGG    | GGATACCTGGGTTGACCAATAA         | G                    | C                     | 90                             | 59.93                             | CaChr3      | 38969598                | MYB                         |
| CaTFSPN125 | acgttgatgTTCTCCAGCAATGACGACTG    | acgttgatgGCCTGCTTCTTATGCTGGAT     | CAAATGTCACAAGTGCCCC            | G                    | A                     | 198                            | 59.98                             | CaChr3      | 39312173                | bZIP                        |
| CaTFSPN126 | acgttgatgGGGAGACCGAAGAAATCC      | acgttgatgTTTTCGGCCCTTCAGACAAT     | GGTGCGCGGATGGC                 | G                    | A                     | 104                            | 59.88                             | CaChr3      | 39546588                | AP2-EREBP                   |
| CaTFSPN127 | acgttgatgCCTGTTTCTCTGCGCTCTA     | acgttgatgTGAGGAGGAGGACTGCTAA      | TAAGGTTTAAACCTGTTCG            | A                    | A                     | 109                            | 59.31                             | CaChr3      | 39788772                | MYB-related                 |
| CaTFSPN128 | acgttgatgCCAAATGATTCAGGATCCCA    | acgttgatgAGCGTGCGGGAATAAGAATA     | CCGGGTAATAATCTCTCTCTTC         | T                    | C                     | 233                            | 59.67                             | CaChr3      | 39816472                | ABI3VP1                     |
| CaTFSPN129 | acgttgatgACATAGATTGGAGGCCAAGC    | acgttgatgTAGTTGGAGGGAGAAAGTGG     | GGATGATGATAGTGAGAGTG           | T                    | A                     | 99                             | 47.1                              | CaChr3      | 39817437                | ABI3VP1                     |
| CaTFSPN130 | acgttgatgGCGGTATGCTTAAGCTTCC     | acgttgatgATGATGCGAGGCTTCATTC      | AGTCTTCTCTCTCTCTCTTTT          | G                    | T                     | 111                            | 45.1                              | CaChr4      | 19353                   | bZIP                        |
| CaTFSPN131 | acgttgatgTGAATCGCATGTACACCAACA   | acgttgatgAGGACAGGTTGTCTCCATGA     | TGATACCACCATGCTCTTTGG          | C                    | A                     | 197                            | 60.9                              | CaChr4      | 832308                  | AP2-EREBP                   |
| CaTFSPN132 | acgttgatgAGCATGACAGGTGTGCTGTGC   | acgttgatgACATGCTCGGTTTCTTTGG      | CGGTGATTTTAATTATGACC           | G                    | T                     | 105                            | 59.93                             | CaChr4      | 1047604                 | SNF2                        |
| CaTFSPN133 | acgttgatgCAAAATCCGGAACCTTGCTTA   | acgttgatgCATTGTGTTGCTGCTGCT       | AATCCAACGACGAGTTTCC            | T                    | C                     | 188                            | 60.07                             | CaChr4      | 1494086                 | WRKY                        |
| CaTFSPN134 | acgttgatgTCCAGCAGAAATGATGGTG     | acgttgatgTTGCACACAAGATTGAGAACA    | GAGAGCATTACTTCTCACTCC          | T                    | C                     | 204                            | 59.65                             | CaChr4      | 1619541                 | bHLH                        |
| CaTFSPN135 | acgttgatgTCCAACACTGCTTCTGGTG     | acgttgatgTGCTTGGTTTGACTGAACA      | TGGCCCTGCACAGTACA              | G                    | C                     | 95                             | 59.87                             | CaChr4      | 2005078                 | PHD                         |
| CaTFSPN136 | acgttgatgGGGTGGTGACCTTTCTGTGA    | acgttgatgCTTTATCGGTTGGCCAAATG     | GGATTTTGTAGTAAACAGAAAAATAAGCAG | T                    | T                     | 201                            | 59.82                             | CaChr4      | 2168233                 | SAP                         |
| CaTFSPN137 | acgttgatgTTTCAACAACCCACACCCG     | acgttgatgTGTCAGAAGAGGTTAGGCG      | GAGAGGTTAGGCGGTATGAA           | G                    | A                     | 94                             | 49.5                              | CaChr4      | 4276290                 | Jumonji                     |
| CaTFSPN138 | acgttgatgTCCATTGTCCAACAATCCCA    | acgttgatgCCCTGTAAAGGGCTCTCTCG     | GAACTTCCCTTCTGATTGTGACTA       | G                    | A                     | 198                            | 59.75                             | CaChr4      | 4745377                 | G2-like                     |
| CaTFSPN139 | acgttgatgCTGTTGTGCTCCACCTCTA     | acgttgatgGGAATTAGTCCCGACATCA      | CTGGTTGGGCTACCTCTCTA           | T                    | C                     | 198                            | 60.25                             | CaChr4      | 5004108                 | bHLH                        |
| CaTFSPN140 | acgttgatgTGTTTGGATCGAGGGTCAAT    | acgttgatgACGAATTTCCCGACCACTTA     | GCTACCTCTCCCTTTCTTCTTCT        | T                    | C                     | 202                            | 60.32                             | CaChr4      | 5022053                 | bZIP                        |
| CaTFSPN141 | acgttgatgTGCAGGAAAGCTTGTCTACA    | acgttgatgCCTTGTGTTTTCATCTGCTGGA   | CGTTGTTTACAATCTGATCAAAA        | G                    | C                     | 108                            | 59.36                             | CaChr4      | 5080383                 | Trithelix                   |
| CaTFSPN142 | acgttgatgGAGGACCACTGCTGCGAATC    | acgttgatgCTTCTGGTGTGTTGTGGA       | AATTGAACAGCTGCCAAATC           | T                    | C                     | 203                            | 60.96                             | CaChr4      | 5677430                 | MYB-related                 |
| CaTFSPN143 | acgttgatgAATTCCGCCATGAGAGCTAA    | acgttgatgCAGGAGAAATCGTCAACATCA    | GCACGTCACTGTTCCCAAT            | A                    | C                     | 208                            | 59.78                             | CaChr4      | 5747340                 | Jumonji                     |
| CaTFSPN144 | acgttgatgTCTTGAAAGAAACCCACACA    | acgttgatgAGGTTGCCACTTCCATCATGC    | AGTTGAATATCAATAAGAAAGAGTTT     | G                    | A                     | 95                             | 59.57                             | CaChr4      | 6183406                 | HB                          |
| CaTFSPN145 | acgttgatgGGCAAAATTTCCCACTCGA     | acgttgatgTCAAAAGTTTTCCTGTGTTGGT   | TGGTTAAACCAATGAGTACA           | T                    | C                     | 105                            | 60.05                             | CaChr4      | 6766479                 | MYB                         |
| CaTFSPN146 | acgttgatgTGCCGCCAAATTTGCTGATAA   | acgttgatgCACTGCAAGCTCCTTCTGATG    | CCACTTTGAATCTTCCCAAT           | C                    | A                     | 116                            | 58.89                             | CaChr4      | 7394399                 | AP2-EREBP                   |
| CaTFSPN147 | acgttgatgGCGGTCGTGAGAAGCAGAAC    | acgttgatgCCAGTTGGGTGCTTACTGT      | AAGCTCTGAAGATGTTGGAACC         | C                    | A                     | 196                            | 60.02                             | CaChr4      | 7974685                 | C3H                         |
| CaTFSPN148 | acgttgatgGAGTAGAATGCTCTCACG      | acgttgatgTTCCGTTAACGATTCACATCC    | TCAATCCAAAGTGGCTCT             | T                    | C                     | 107                            | 47.6                              | CaChr4      | 8390599                 | BSD                         |
| CaTFSPN149 | acgttgatgCCTCAGAAATGAAGTCAACAACA | acgttgatgGAGCCAACACCTGTTAGAGGA    | GATAATATATCAGACTCATTTTCCACCAAT | G                    | C                     | 191                            | 59.27                             | CaChr4      | 8471278                 | AP2-EREBP                   |
| CaTFSPN150 | acgttgatgTCCCTTTTGTCCCAAAAT      | acgttgatgTCGCTGAGGAGAGAGAGAAAT    | AAATCTCAATTTCAAAACCCTAAT       | A                    | T                     | 82                             | 60.77                             | CaChr4      | 8769821                 | NAC                         |
| CaTFSPN151 | acgttgatgGGGAGACAGAGATTACGAG     | acgttgatgACGATTTCCGATTTGGAATG     | GGCCGAGGTAATGATGC              | G                    | A                     | 208                            | 59.69                             | CaChr4      | 9471744                 | AP2-EREBP                   |
| CaTFSPN152 | acgttgatgTTGCAAGGATGGAGTGTGG     | acgttgatgGGGGGACGAAGAGTGAATTTT    | GAAAGTTGAGACACGACTCCATCTA      | A                    | C                     | 177                            | 59.87                             | CaChr4      | 10704805                | mTERF                       |
| CaTFSPN153 | acgttgatgCTCGTGCTCACAAGTGCTTC    | acgttgatgGTGCCAAGGATGGATCTGTT     | AAATGATCATATGGGATTTAGAGCA      | G                    | A                     | 197                            | 59.78                             | CaChr4      | 10973664                | SAP                         |
| CaTFSPN154 | acgttgatgGAAAGTTTGGGCGTTCTCA     | acgttgatgATAATCGGAATCGCGGAAC      | GGGCGTTTCTATTTTG               | G                    | T                     | 92                             | 60.23                             | CaChr4      | 11054722                | NAC                         |
| CaTFSPN155 | acgttgatgTCGACGAGTAGAGGATGATGA   | acgttgatgCGCAATCTTCTTCTCCAC       | CCTCGCCTATATAAGAAACCGC         | G                    | A                     | 213                            | 60.36                             | CaChr4      | 11600593                | Trithelix                   |
| CaTFSPN156 | acgttgatgCTTGTGGCATTGTGGAATTG    | acgttgatgCATAGGGCGCTTCCAAGATT     | GCTTCCAAGATTGACGATAA           | A                    | A                     | 220                            | 59.96                             | CaChr4      | 12315577                | RWP-RK                      |
| CaTFSPN157 | acgttgatgCCAGAATGCTGCTCCCAATGT   | acgttgatgGCCCAAGAGCTTTGCAGAT      | CAAGGCCAAGTTGCCAG              | C                    | A                     | 209                            | 59.78                             | CaChr4      | 12318493                | RWP-RK                      |
| CaTFSPN158 | acgttgatgCATGATTAGAGGAACATGG     | acgttgatgAGGACATGTGATCCAAAGGC     | TTCCAAATGCAAAATCAAATCCATA      | G                    | C                     | 101                            | 50.1                              | CaChr4      | 12319718                | RWP-RK                      |
| CaTFSPN159 | acgttgatgTTTGGGAGAAAGCTCCATGC    | acgttgatgTTTTGCATCTTGTCTTTCG      | TTAGCATGAAAGATTGTCAGA          | G                    | A                     | 101                            | 60.2                              | CaChr4      | 12964701                | MADS                        |
| CaTFSPN160 | acgttgatgACAGCCTAGACTGCGCTCAG    | acgttgatgCTAGGCCCAATGTTTCTTGC     | TCTTGTGAGTCATACAGCATCG         | G                    | A                     | 190                            | 59.62                             | CaChr4      | 13328322                | TIFY                        |

| SNP IDs*   | 1st Pre-PCR primer sequence        | 2nd Pre-PCR primer sequence        | Unextended Primer sequence    | SNP allele (CC 4958) | SNP allele (CC 17160) | Size (bp) of alleles amplified | Actual annealing temperature (OC) | Chromosomes | Physical positions (bp) | Transcription factors (TFs) |
|------------|------------------------------------|------------------------------------|-------------------------------|----------------------|-----------------------|--------------------------------|-----------------------------------|-------------|-------------------------|-----------------------------|
| CaTFSNP161 | acgttggatgCTCCTTCAACAAGGGCAGAG     | acgttggatgTATGGGAACAATGCATGCTG     | AACACAGTAGGGTCAAGATGAAAAG     | T                    | C                     | 196                            | 59.98                             | CaChr4      | 13727396                | Alfin-like                  |
| CaTFSNP162 | acgttggatgGGCATAATTCGGCTAAACAGAT   | acgttggatgTGGATCTTGGCCCTTACGTT     | TGAGAAGTAGATAGGGCTCAAAGAAA    | A                    | T                     | 221                            | 59.96                             | CaChr4      | 14094264                | FHA                         |
| CaTFSNP163 | acgttggatgCCAGCAACAGCTTTGCTAGT     | acgttggatgCCGGAATACCCCTCAAGCTAA    | TTGGGTGTTCCGCTCGAA            | G                    | A                     | 191                            | 58.85                             | CaChr4      | 14511914                | LIM                         |
| CaTFSNP164 | acgttggatgACCATCTCTGCAGACCTCAGT    | acgttggatgAGGAGGGGCAAGAAAGGAAAG    | TGGTCTCCATAAAGGGCATGT         | A                    | T                     | 195                            | 59.71                             | CaChr4      | 15539515                | C3H                         |
| CaTFSNP165 | acgttggatgGACTTGTACGACCGCGTTT      | acgttggatgTGATGACAAAGAACCTGGCTA    | AAACCCGCTAGAGCTTTGTGA         | G                    | A                     | 200                            | 60.18                             | CaChr4      | 16279070                | C2C2-CO-like                |
| CaTFSNP166 | acgttggatgCCAAAAAGAGACTTGTCTTGG    | acgttggatgAAGTCAAGTCAGATCCAATC     | TCCACTCTTAAGAAACAAAAA         | G                    | C                     | 119                            | 45.1                              | CaChr4      | 16362489                | AP2-EREBP                   |
| CaTFSNP167 | acgttggatgCTTCCACCAATTGCATGCAC     | acgttggatgAAATGGAGGCGATTCTATCTG    | TCGTTTCTTCCCTTAGTAGCG         | T                    | C                     | 206                            | 59.97                             | CaChr4      | 17427472                | Jumonji                     |
| CaTFSNP168 | acgttggatgTTTTGGTGAAGACCATGCTGTG   | acgttggatgCCCTCACCAGAGCAACAAAT     | TCAGATCATCAACTGTAAGCCG        | G                    | T                     | 203                            | 59.69                             | CaChr4      | 17722046                | SNF2                        |
| CaTFSNP169 | acgttggatgGGTGCTCCATTTTGCAGTTT     | acgttggatgCGGTTACGCTCCAAGATTCTC    | GGTTCCAAATAGGCGTGCT           | G                    | T                     | 181                            | 60.12                             | CaChr4      | 17862210                | HB                          |
| CaTFSNP170 | acgttggatgATGGGACAATGCAAGAGCTG     | acgttggatgAATTTTTCGAGTGGCTGAGG     | CGCAATTGAGGCCCTCAC            | A                    | C                     | 102                            | 61.03                             | CaChr4      | 19013085                | C3H                         |
| CaTFSNP171 | acgttggatgTGCAGAGATGTATGTCAGAA     | acgttggatgTTCCAATGCCCTATCTTCCC     | AGAAGAAAAACACACTCCACCAA       | A                    | C                     | 198                            | 59.43                             | CaChr4      | 19586476                | MYB-related                 |
| CaTFSNP172 | acgttggatgAAGTCTCGGTATGCATCGAG     | acgttggatgAAAGGGTCCGATCAGTTGGAG    | CTAAAGAGCTCAAAAAGTCTCTTGTG    | A                    | T                     | 105                            | 49                                | CaChr4      | 20446814                | Sigma70-like                |
| CaTFSNP173 | acgttggatgCAAAAGACAGTCCCTGAGTAG    | acgttggatgGCAGTACAACATGTGGAACG     | GAACAATTTCAGGCGCGCGTGA        | G                    | A                     | 99                             | 56                                | CaChr4      | 23557644                | HB                          |
| CaTFSNP174 | acgttggatgCAAAACCCACATCAAACTTTG    | acgttggatgCTTCTGAGGTTTTTCTTGTG     | CAAAATTAAGTGTAGTGGATCTT       | C                    | T                     | 100                            | 47.6                              | CaChr4      | 29778149                | HB                          |
| CaTFSNP175 | acgttggatgCGGCTGAACAAATCTTGGCC     | acgttggatgAACTGTTCTCGTAGGTATCCG    | CAACAGAAATTTGGTTCGT           | G                    | A                     | 114                            | 45.9                              | CaChr4      | 36535887                | ABI3VP1                     |
| CaTFSNP176 | acgttggatgAGAGTCAAGCTCAGCAAGGAA    | acgttggatgGGCCAATTTTGTGCAATTCT     | TTGAGTTAAATATTAACCAAGAAAAAC   | G                    | A                     | 206                            | 59.99                             | CaChr4      | 36974817                | SNF2                        |
| CaTFSNP177 | acgttggatgGAGAATGTTTGTGTGAGGCTCTT  | acgttggatgTGAAAAACAACTCGCGAAA      | AAGTACTCAAAACACAAGGATC        | T                    | C                     | 101                            | 59.81                             | CaChr4      | 37061273                | SET                         |
| CaTFSNP178 | acgttggatgTGTCTTGTGGATCACACATATAAG | acgttggatgGGCAGGAAGTAGCTGCGATA     | CATATAAGAGATTCCTTCTCACAA      | T                    | C                     | 112                            | 59.83                             | CaChr4      | 37096147                | ABI3VP1                     |
| CaTFSNP179 | acgttggatgGGGAGTGGTGAATTTCCCTTTTC  | acgttggatgCATGGAATGTGGACTTGAAGC    | CTAGAGAGAAAATAACAACTTGAATGA   | A                    | T                     | 185                            | 59.8                              | CaChr4      | 37097065                | ABI3VP1                     |
| CaTFSNP180 | acgttggatgTTTCACAAAATCAAGGCCAACCC  | acgttggatgTGAATAAATTCGCTCATACCA    | ATAGGGAGTGGTGATTTCCCTTTT      | A                    | T                     | 189                            | 59.97                             | CaChr4      | 37097068                | ABI3VP1                     |
| CaTFSNP181 | acgttggatgTGTTATCCTTGTCTTCGCTGA    | acgttggatgCAACCACCATGTTTCCATCA     | CTCGCAAAAGCATCACTGG           | G                    | A                     | 205                            | 59.57                             | CaChr4      | 37514472                | Tify                        |
| CaTFSNP182 | acgttggatgTATCCGGGAGGAAACAGATGG    | acgttggatgGCTGCATAGGTTGAACACGA     | ATTTGAGAATTGAATCCCTTCC        | A                    | T                     | 203                            | 59.89                             | CaChr4      | 38486601                | MADS                        |
| CaTFSNP183 | acgttggatgCGGCTGTGATGACTCTGAGTCC   | acgttggatgGTGATGAAGCTGGAATGCAA     | GCTAGCTTTTCAAGTCTTTGCTCAT     | G                    | C                     | 203                            | 60.63                             | CaChr4      | 38659802                | GRAS                        |
| CaTFSNP184 | acgttggatgTGGCGATCAAACTGTTGCTA     | acgttggatgTAAAGTCAAGCATCGCTCGT     | TAGGGCTGTATTTCCTCTGG          | G                    | A                     | 203                            | 60.4                              | CaChr4      | 39804794                | Trihelix                    |
| CaTFSNP185 | acgttggatgCCGAGCGAATTTGACAGTACA    | acgttggatgTTTCATGATCGTCCGGGATT     | AAGTCAGATACAAAAGACGAGAAA      | A                    | A                     | 200                            | 59.86                             | CaChr4      | 40230993                | Sigma70-like                |
| CaTFSNP186 | acgttggatgGGTGGTTTTGGTCAAGGATG     | acgttggatgACCAAGCAACCAACCTTCAG     | GGTGTGTTCTCGGAAATAGGGT        | A                    | T                     | 201                            | 60.21                             | CaChr4      | 40578365                | Jumonji                     |
| CaTFSNP187 | acgttggatgAACGGTTTTCACGTCGTTGTC    | acgttggatgGAACCTTTTCAAGCAAGCGTCC   | CCCAATTGCGCGGAGGA             | T                    | A                     | 100                            | 48.8                              | CaChr4      | 40933076                | bZIP                        |
| CaTFSNP188 | acgttggatgAAGTTTCTGCTGCAAAAACCTGTG | acgttggatgTGGTGACAGAAACAAATGTATG   | TTCTCTGCAAAAACCTGTGT          | G                    | C                     | 111                            | 59.98                             | CaChr4      | 41866592                | LUG                         |
| CaTFSNP189 | acgttggatgTGTCTTAGAGGACGCTGTGTTG   | acgttggatgTGATGATGAGCCCTTTCGT      | GACGCTGTTGGCTTGAC             | T                    | C                     | 91                             | 59.22                             | CaChr4      | 42354903                | bZIP                        |
| CaTFSNP190 | acgttggatgTGGTTATGTGTAAGCCATT      | acgttggatgACTTACCCCGATCTTAATCT     | AGATTCTAATTTCTAATT            | G                    | A                     | 91                             | 51.25                             | CaChr4      | 43891050                | HB                          |
| CaTFSNP191 | acgttggatgTTCCTTCTCTTGTGAATGA      | acgttggatgTTCATGGCTTAATGATATTG     | ACTGTTTCAATATTATATATAT        | G                    | C                     | 97                             | 38.89                             | CaChr4      | 44393302                | C2C2-CO-like                |
| CaTFSNP192 | acgttggatgGGAATTCGCATAGCTTGGTAG    | acgttggatgCCCTCCCAATCCAATTCAC      | ACACTCTCAACCTTCAAAG           | C                    | T                     | 118                            | 47.5                              | CaChr4      | 44394420                | C2C2-CO-like                |
| CaTFSNP193 | acgttggatgGGGTCCATTGCAAGGACATA     | acgttggatgCGGCTAGGCAAGAGTTTGA      | CAAGCATATTTAGCTGATTTTCAAT     | T                    | C                     | 203                            | 59.49                             | CaChr4      | 45416533                | HB                          |
| CaTFSNP194 | acgttggatgGACAGAGCAGCATCGGGAAAA    | acgttggatgAGTATTTCGGCGGAAAGTGG     | GCAGCAGAGATTAGAGATCCACA       | C                    | C                     | 203                            | 59.9                              | CaChr4      | 45736499                | AP2-EREBP                   |
| CaTFSNP195 | acgttggatgAGGTGACCATGAGAAATATGC    | acgttggatgTCCACACACTTGCACAAACAA    | GCAAGTTTCATATTTGTGAACATACA    | T                    | C                     | 194                            | 59.04                             | CaChr4      | 45835578                | LIM                         |
| CaTFSNP196 | acgttggatgTACGCCCTCTTGCTCCTAAA     | acgttggatgGGAAGCACTTTTCGGGCTTAA    | CACCTTCGGGCTAATGAAA           | G                    | C                     | 107                            | 59.97                             | CaChr4      | 46419887                | HB                          |
| CaTFSNP197 | acgttggatgTGTGAAGCGTATAAGCGGTCT    | acgttggatgAATCCCCCAATTCACATCCC     | CAGGGGAGAACACTTTACGG          | T                    | C                     | 198                            | 59.92                             | CaChr4      | 46995447                | CCAAT                       |
| CaTFSNP198 | acgttggatgTTAAGCGGAGAGGAGAACCA     | acgttggatgCAAGCAAAACATTCGTTGGTG    | AAATAGAGATAGAAAATACCCTTCTGTT  | A                    | T                     | 201                            | 59.95                             | CaChr4      | 47258388                | ABI3VP1                     |
| CaTFSNP199 | acgttggatgACCGATCAACCAATTCACG      | acgttggatgTTCAGACGCTGGAATAACCTCA   | CAATTCAGCGGATTCAACC           | A                    | A                     | 203                            | 59.94                             | CaChr4      | 47445593                | LIM                         |
| CaTFSNP200 | acgttggatgATCCTGATCAGCAAGAACACG    | acgttggatgGGCGTAAACATGGATGAAGT     | CAACCCATCTTGTATCTCAAC         | G                    | A                     | 96                             | 59.93                             | CaChr4      | 47884183                | HMG                         |
| CaTFSNP201 | acgttggatgGGCTTGGTTCGGATACATGTT    | acgttggatgGGAGATGCTCAAGCTGATTCCA   | GTAGGCAAGATTGCAATTC           | G                    | A                     | 101                            | 60.33                             | CaChr4      | 48124866                | HB                          |
| CaTFSNP202 | acgttggatgGATTTGTGTTCTTGGTAGCA     | acgttggatgGAGCCACAGTTCAACCCACT     | GCACCCAGGGATTTCTCT            | T                    | 185                   | 59.7                           | CaChr4                            | 48276063    | SWI/SNF-SW3             |                             |
| CaTFSNP203 | acgttggatgGGCTGACCTCGGTATATATG     | acgttggatgTCAACCTCCAACCTCAAGAAC    | TGTTGAGATTTGCATGATAA          | C                    | T                     | 101                            | 48.3                              | CaChr4      | 48384848                | ARF                         |
| CaTFSNP204 | acgttggatgCCTCTCGACAGAAATCTTGTG    | acgttggatgTGATCTCAATTACCGTGCAG     | TGGCAAGGTTAATGATGATGACGACAA   | A                    | G                     | 110                            | 54                                | CaChr5      | 166360                  | NAC                         |
| CaTFSNP205 | acgttggatgACGACAGTGTTCGGGAATGG     | acgttggatgCATGATCAAGCCCTATAGAC     | ATTGGTGAATAGGATACCTT          | A                    | A                     | 98                             | 49.5                              | CaChr5      | 7382449                 | bHLH                        |
| CaTFSNP206 | acgttggatgTGTGTAAAAATGGGAGAGG      | acgttggatgCCATTCTCTCTTGCAGAAAGTT   | GAAAAATTGAAATAAAAAGGATTGA     | G                    | A                     | 89                             | 59.9                              | CaChr5      | 7681689                 | MADS                        |
| CaTFSNP207 | acgttggatgGGAAGTCCGCTTGAATTGAT     | acgttggatgTTTCTGGGCAACCATCTC       | TTTTCTGGAACATTTGACACTTGA      | G                    | A                     | 191                            | 59.94                             | CaChr5      | 9958884                 | WRKY                        |
| CaTFSNP208 | acgttggatgACTTACTGCCTGAGCGGGTA     | acgttggatgATCCTTCAATCGAACCCAGG     | TGAATTTTACAGATCTTGTGTTT       | T                    | C                     | 187                            | 59.9                              | CaChr5      | 10989680                | FAR1                        |
| CaTFSNP209 | acgttggatgGGAGGTTAATGAGTTTGTCAAC   | acgttggatgGAGAAGGAATTTGCACTCCG     | CGGTTGGTGTGCTG                | A                    | A                     | 104                            | 48.7                              | CaChr5      | 11384336                | C3H                         |
| CaTFSNP210 | acgttggatgGACGGAAATTTATTTCAACCA    | acgttggatgTTGACAAACAGAACATGGA      | TCATTTCTAGTGAGCTTCAAGTC       | A                    | C                     | 87                             | 57.4                              | CaChr5      | 14755276                | ABI3VP1                     |
| CaTFSNP211 | acgttggatgTCCAGCTTACTTTGAACCTTG    | acgttggatgCATACCAAGAACCAACCTCA     | CCCTCATTTATCAGAGAAGCG         | G                    | A                     | 120                            | 48.3                              | CaChr5      | 16677409                | C3H                         |
| CaTFSNP212 | acgttggatgTTGTGGTGTGAATAATGTTGCA   | acgttggatgACATGAACCGCAACCAAGTG     | GTTGTCACTTGTGTAGGCTTA         | T                    | C                     | 116                            | 60.14                             | CaChr5      | 19048521                | GNAT                        |
| CaTFSNP213 | acgttggatgACCTCATCAGAGGCTTTTGA     | acgttggatgAGGGATTTCGGAGAAGGATGT    | CCGCAAGCACTCCAC               | C                    | 206                   | 60.8                           | CaChr5                            | 21801207    | FHA                     |                             |
| CaTFSNP214 | acgttggatgTTCCTGTTCTCTCTTCTCCAC    | acgttggatgAATCCCTCCCTCATGTTTC      | ACTCTATGGTCTCCTCTGCTCT        | G                    | T                     | 118                            | 54.5                              | CaChr5      | 21801378                | FHA                         |
| CaTFSNP215 | acgttggatgCCCATCAAAAGAGAGATTGG     | acgttggatgTCAGCTGATGATATGGATGGA    | AGAGTTTGTGTTTCTCTCCA          | A                    | T                     | 102                            | 60.87                             | CaChr5      | 24343946                | CCAAT                       |
| CaTFSNP216 | acgttggatgCAGCCAGCATATGACAGGATTTC  | acgttggatgTGCATATTTTGAACCTGCATT    | TGACCCTGCAATTTAAACTC          | T                    | C                     | 110                            | 59.85                             | CaChr5      | 24717637                | MYB                         |
| CaTFSNP217 | acgttggatgTGGATCATTCCTCAATGAATC    | acgttggatgTTCGTAGGCTCCTCCTTAG      | GAATATTAAACAGTGTGTTGATTC      | A                    | G                     | 111                            | 45.4                              | CaChr5      | 26426790                | WRKY                        |
| CaTFSNP218 | acgttggatgAAATGCTGAGGAAAGCGTGAT    | acgttggatgGAATCACACCCACCCACTTC     | GAGAAAATGACTATGTTGGTGACG      | G                    | A                     | 202                            | 59.84                             | CaChr5      | 27042239                | MYB-related                 |
| CaTFSNP219 | acgttggatgTCGGTTCAAACCCCTAATGC     | acgttggatgTCTGTCCAGCACTTGACTCG     | GTGAGATACCAACGAGGATC          | C                    | 203                   | 59.94                          | CaChr5                            | 27150196    | ABI3VP1                 |                             |
| CaTFSNP220 | acgttggatgAAGCTGCGAGCCTGATCTAA     | acgttggatgTCTTCGTTTGTGCAAAATGC     | TCACTTGACATCTCTCGGTTCA        | T                    | C                     | 201                            | 60.12                             | CaChr5      | 27749046                | ARF                         |
| CaTFSNP221 | acgttggatgGGCATGAAAGGCTATGAACC     | acgttggatgTCTTGCACCTCGTTTGAATGAA   | ATGAAAGGCTATGAACCAAGC         | T                    | C                     | 118                            | 59.53                             | CaChr5      | 28253736                | LOB                         |
| CaTFSNP222 | acgttggatgGCGAGAGGTACACAAAA        | acgttggatgAATAACACAATTTTGAAGC      | ACAAATCAATTTCTTATT            | G                    | C                     | 73                             | 49.91                             | CaChr5      | 29397487                | AP2-EREBP                   |
| CaTFSNP223 | acgttggatgCCCTGCGAGTCTTGAAGATA     | acgttggatgCATGCTGCAATCATGGATGG     | AGAGCATGCGGAAGTACACCAC        | T                    | C                     | 189                            | 60.25                             | CaChr5      | 29790311                | FHA                         |
| CaTFSNP224 | acgttggatgTGTGGCTCTGAACTGATG       | acgttggatgGATCCATCAGCCACTTGTAG     | TAACTAGTACCACTGATTT           | C                    | G                     | 112                            | 49.7                              | CaChr5      | 30439023                | MYB-related                 |
| CaTFSNP225 | acgttggatgGCTAGTGGCTCCACCGGTTA     | acgttggatgGTAAGTGTCCGCCCTTGTCT     | GATATGGAAGAAGCAATTCACAGT      | A                    | T                     | 210                            | 60.27                             | CaChr5      | 31244017                | Bromodomain                 |
| CaTFSNP226 | acgttggatgAGACGGAAGCATTCATGACC     | acgttggatgAAACTGAACTGGGCTTCCA      | ACTCTGTATCCGGATGTGGTG         | G                    | A                     | 192                            | 60.08                             | CaChr5      | 33879428                | bZIP                        |
| CaTFSNP227 | acgttggatgGACTGCATAGCATGTAAAC      | acgttggatgATGAAGTCTCTCCGAAATGC     | GAGAGGCTGATAAGGCCCTAA         | G                    | A                     | 100                            | 50.4                              | CaChr5      | 34476592                | Tify                        |
| CaTFSNP228 | acgttggatgAGCAAAAGCCCTTCTATGACG    | acgttggatgCAACATCAGCCCGCAGAGTTC    | ACAGAACTTGGCATCACCATC         | T                    | C                     | 204                            | 60.52                             | CaChr5      | 34510155                | LUG                         |
| CaTFSNP229 | acgttggatgGCGAGATTCAACTCCCATCTCT   | acgttggatgGCAAGATTCCCTCCCATCTCT    | GTATCAGAAGTAGCATGAGGAATCTC    | A                    | T                     | 201                            | 59.62                             | CaChr5      | 34684944                | bZIP                        |
| CaTFSNP230 | acgttggatgTCGGAATCTTGAATGGAACCTT   | acgttggatgGTCTCGGTTGCTGGTTTGT      | TCTCAGAGTTTTCAGTAAATAATCACA   | G                    | A                     | 200                            | 59.53                             | CaChr5      | 35117329                | ARR-B                       |
| CaTFSNP231 | acgttggatgCCACAGTAGAGAGCTGCGTGA    | acgttggatgGTGCGTTCTCATCTCAACTCG    | GGTCCAATTCGCTGCTCCT           | T                    | C                     | 192                            | 59.9                              | CaChr5      | 35122407                | PHD                         |
| CaTFSNP232 | acgttggatgAATCGGAAGAGCTTCTGTGAC    | acgttggatgCTGCACCACTGTGATTCC       | CTGCGAAGTCTGCGAACA            | A                    | T                     | 199                            | 60.12                             | CaChr5      | 35389971                | C2C2-CO-like                |
| CaTFSNP233 | acgttggatgTCGTTTACCAACCAATCTTTG    | acgttggatgCGTGTATGATGATCATTTACCAAG | TAGCTAGGGCCTAGGGGG            | A                    | T                     | 105                            | 61.01                             | CaChr5      | 36046988                | HB                          |
| CaTFSNP234 | acgttggatgTCCCCCAACAATTTCTCAA      | acgttggatgTGGAATCAAACTCCGGTTC      | AACAACAAGACAAGATGGATGATG      | T                    | C                     | 199                            | 59.9                              | CaChr5      | 36211837                | BSD                         |
| CaTFSNP235 | acgttggatgTGCAGCTGACTAAGACATGAAA   | acgttggatgTTGGCCACAACAATAATGACA    | AAGCATAGAGCTAACATAAAATAT      | A                    | T                     | 120                            | 58.73                             | CaChr5      | 36283170                | LIM                         |
| CaTFSNP236 | acgttggatgCAAGGAGATCGACCGGTGAAC    | acgttggatgCCGATGCAAGTGGTGAAGT      | CTGATACCTCCACCACCAC           | T                    | C                     | 206                            | 60.66                             | CaChr5      | 37147512                | zr-HD                       |
| CaTFSNP237 | acgttggatgGGCTTCCCACACTTTCTCTCT    | acgttggatgGGTGAAACCTTAACCTTAACA    | CTTCCCACACTTTCTCTCTCTAC       | A                    | G                     | 103                            | 59.87                             | CaChr5      | 37485160                | C2C2-GATA                   |
| CaTFSNP238 | acgttggatgTCTCGTTGACCAATGCTGTT     | acgttggatgAAGGAAAGAGAAAAGAGCCAAA   | TCTGTTTGAACCAATGCTGTT         | A                    | A                     | 201                            | 59.29                             | CaChr5      | 37814550                | Jumonji                     |
| CaTFSNP239 | acgttggatgTTTTGCAACATTTTCGTGTGAA   | acgttggatgTCCGAAACACGAAGAGTGTCT    | CTAATCAATTCAGCATTAACATCAGAATA | T                    | C                     | 197                            | 60.23                             | CaChr5      | 37985131                | MYB-related                 |
| CaTFSNP240 | acgttggatgTTTGGTCTGCATTTTCTGTGCA   | acgttggatgTTTCATGATTCAGACAACAA     | TCTGTATTTCGGTTCCTCT           | T                    | C                     | 205                            | 59.31                             | CaChr5      | 38149806                | bHLH                        |
| CaTFSNP241 | acgttggatgTGGGTGGAACCTTTCATGTCA    | acgttggatgAGAAAGCATTTTGTGCGAGGT    | ATGTAGAAGAGGCGGGTGC           | A                    | A                     | 203                            | 59.94                             | CaChr5      | 38467232                | GNAT                        |

| SNP IDs*   | 1st Pre-PCR primer sequence       | 2nd Pre-PCR primer sequence        | Unextended Primer sequence     | SNP allele (CC 4958) | SNP allele (CC 17160) | Size (bp) of alleles amplified | Actual annealing temperature (OC) | Chromosomes | Physical positions (bp) | Transcription factors (TFs) |
|------------|-----------------------------------|------------------------------------|--------------------------------|----------------------|-----------------------|--------------------------------|-----------------------------------|-------------|-------------------------|-----------------------------|
| CaTFSNP242 | acgttggatgGCTTACGTGGATGCAGGTTT    | acgttggatgTCTAAAGCTGATGGGCCAAA     | CTAAAGGATCAAAAATAATGGTTGT      | T                    | C                     | 202                            | 60.14                             | CaChr5      | 40243059                | FAR1                        |
| CaTFSNP243 | acgttggatgTTTGGCTATGTTCCGTGTGT    | acgttggatgTGTCTGTATCAAAATGGGCATT   | CAGAAGGTGAATTAGACAATGATGA      | T                    | C                     | 186                            | 59.05                             | CaChr5      | 40405468                | FHA                         |
| CaTFSNP244 | acgttggatgAAGAGCTTCATTCTCTTGCTGAA | acgttggatgAAATCGTCTGCTGCTGTTTG     | AGCTTCAATTCTTGCTGAAG           | A                    | C                     | 118                            | 59.8                              | CaChr5      | 40619677                | HB                          |
| CaTFSNP245 | acgttggatgTGAGCGCAAAATAGTATCCTC   | acgttggatgCCCGAAATAGAGGAACAACG     | CTCCGAAACAACCTCAACCG           | T                    | C                     | 200                            | 59.47                             | CaChr5      | 41313407                | SET                         |
| CaTFSNP246 | acgttggatgAAAGGAGCTGTCTCAAGCTCAA  | acgttggatgATGCCTATGGGTGCAATTCA     | TTTATTCTGTTCTCAATTATTCTTGATG   | C                    | C                     | 202                            | 59.25                             | CaChr5      | 41478089                | SWI/SNF-SWI3                |
| CaTFSNP247 | acgttggatgTTCGATTTCGAGAAGTGCTC    | acgttggatgTGTGGAAGGTGACTTCCAG      | CCATTCTGTGGCGGTGTGCTTTATTGA    | C                    | T                     | 97                             | 55.6                              | CaChr5      | 42527654                | CAMTA                       |
| CaTFSNP248 | acgttggatgTGCTTCACTTCCCTCTAGACG   | acgttggatgAGGATCTTGAGCCATGTTGG     | GCGATTTTCTCTAATGGTGTCTA        | A                    | C                     | 83                             | 60.39                             | CaChr5      | 42984383                | ARR-B                       |
| CaTFSNP249 | acgttggatgAGGAAACCTTGACGACAAATG   | acgttggatgTGACCATACTCGTCCCATCA     | CGAACCTGCTTAGTCTTGCAAT         | G                    | C                     | 201                            | 60.25                             | CaChr5      | 43835527                | bZIP                        |
| CaTFSNP250 | acgttggatgTGCATCTCTTCCACCAGAG     | acgttggatgACTTGCAAGGACAGCAGTGA     | TTCTTCACCAGAGGCGCTC            | G                    | T                     | 117                            | 58.96                             | CaChr5      | 44421018                | SET                         |
| CaTFSNP251 | acgttggatgGGTAAAGCACTGCGACAAT     | acgttggatgGGGGATCAATTTGGTCTCAG     | TGCAGCAGAAATGCTCCATA           | A                    | T                     | 196                            | 60.28                             | CaChr5      | 44560496                | HB                          |
| CaTFSNP252 | acgttggatgGATGGAGTGCCATTCATTGGT   | acgttggatgGTGAAGATGCAATTTCCCA      | GGAAGTTGATCAATCTTCTCAATTTTACTG | C                    | C                     | 198                            | 59.93                             | CaChr5      | 45076994                | Sigma70-lke                 |
| CaTFSNP253 | acgttggatgAAGCTGACGAAAGTCGTGCT    | acgttggatgCAGAAGACCAACAAGTGCAATT   | AGTCTCTTAACCCCAAGATAGAACCT     | A                    | C                     | 210                            | 60.34                             | CaChr5      | 46175167                | NAC                         |
| CaTFSNP254 | acgttggatgACACCGGGTTTCTCATGTTC    | acgttggatgCGCATCAAAAGGCATTGTGG     | GGTTGTTAACAAGAAATGGAGGGACC     | T                    | C                     | 97                             | 53.3                              | CaChr5      | 46513987                | bZIP                        |
| CaTFSNP255 | acgttggatgTTTGTTTTTCGCGGATGAAT    | acgttggatgGCTTCATCAGCTTTTGGTTC     | GTTTTGAAGAAAGAAAACCCACATA      | G                    | A                     | 175                            | 60.3                              | CaChr5      | 47223799                | CaChr5                      |
| CaTFSNP256 | acgttggatgGTGCAGCAATTTGACAACCG    | acgttggatgGTTGACCATTACACATCGG      | AAATTTGGGTGGAACAAGAATTTCTCACT  | A                    | G                     | 94                             | 54.7                              | CaChr5      | 47734066                | NAC                         |
| CaTFSNP257 | acgttggatgTCACTTCTGACATGAATC      | acgttggatgGTAGGTTTCTTGGTGATCCC     | TTTCTTTTAACTTTGGTGATGA         | C                    | G                     | 119                            | 45                                | CaChr6      | 789313                  | GRAS                        |
| CaTFSNP258 | acgttggatgTTGCTTTCCAAAGCCAAAGAT   | acgttggatgTGGAAGGAGGCCATAAAGGA     | CATAACCAACAATCTATAAGTTTCCATC   | A                    | C                     | 219                            | 59.82                             | CaChr6      | 1609229                 | LIM                         |
| CaTFSNP259 | acgttggatgCTTCGGATGCCAATTTGATT    | acgttggatgTCTGCTCTCGACCAATTG       | CATCTTCCCTCAACTCATCC           | G                    | A                     | 205                            | 59.9                              | CaChr6      | 1842423                 | GeBP                        |
| CaTFSNP260 | acgttggatgTCAGCAGCAGAGCGTTTATG    | acgttggatgAAGGGTTCAGCTGCTCAATG     | GCCCTTCTACAACAAGATCTCTAATC     | G                    | A                     | 188                            | 60.3                              | CaChr6      | 2925948                 | Tily                        |
| CaTFSNP261 | acgttggatgCAAGTCCAAAGCTGGCAAGT    | acgttggatgTTCCTGTAAATGCCAATCA      | CAAGCTGGCAAGTTATAGATGAT        | G                    | A                     | 205                            | 60.43                             | CaChr6      | 5506963                 | bHLH                        |
| CaTFSNP262 | acgttggatgCCTGACTGGGATATCTTTGC    | acgttggatgCTATTATCGCTGGAAGGAG      | CTGAAAGACTCACTCTGAGCA          | T                    | C                     | 116                            | 47.3                              | CaChr6      | 5688576                 | LIM                         |
| CaTFSNP263 | acgttggatgCCAACCTTGGAAATGGAGGAGA  | acgttggatgAAGCTTCTGGAAGGTTGTTG     | CCACAATCACAAACCACACC           | A                    | A                     | 184                            | 60.04                             | CaChr6      | 5789222                 | NAC                         |
| CaTFSNP264 | acgttggatgGGAGATTGGGTTTGTGTGCG    | acgttggatgTGATGATCTGGTGCAATTGAA    | GAACTTGAAACATGAAGGAGACGTAG     | T                    | C                     | 203                            | 60.35                             | CaChr6      | 6015415                 | SBP                         |
| CaTFSNP265 | acgttggatgTTTGGTAGCGTCCAGAGAT     | acgttggatgTCCAAGACACGGTCCAAAAAT    | CAGAATATGGATGGCAGAATGA         | G                    | A                     | 190                            | 59.73                             | CaChr6      | 6142063                 | ARF                         |
| CaTFSNP266 | acgttggatgGAGCGCCAAAGTTGGTTGAAG   | acgttggatgTAGAAGGGTTGGCAAGCAAT     | CTAAGTTGGATACCATCACTACATC      | G                    | A                     | 209                            | 59.67                             | CaChr6      | 6295375                 | C3H                         |
| CaTFSNP267 | acgttggatgGCATCTTGGCAAGTGTGAGAA   | acgttggatgGTTGGAAGGGATGGACTCAA     | AACATTAACTCTCTCTGGCTTTAG       | T                    | C                     | 206                            | 59.27                             | CaChr6      | 6913579                 | SNF2                        |
| CaTFSNP268 | acgttggatgGTCTTCTCGCACCTATTTCG    | acgttggatgTTCCATTCTCTCGCGATTCC     | TTCCATTCTCTCTCGCGATTCC         | A                    | T                     | 210                            | 59.71                             | CaChr6      | 7275013                 | MYB                         |
| CaTFSNP269 | acgttggatgGGCCAGACACAGAAATCAAG    | acgttggatgGCAATCAAAATCCAAACAACAA   | AGGAAGAACGAGAGAAGAGTTTTTT      | A                    | C                     | 194                            | 60.55                             | CaChr6      | 10032665                | zf-HD                       |
| CaTFSNP270 | acgttggatgTCATTTCTGAGTGAATCTTG    | acgttggatgGAGCCTGATGGAAGAAGTGTC    | GTGCTAGCATCTCTGATG             | C                    | T                     | 118                            | 45.2                              | CaChr6      | 10748091                | mTERF                       |
| CaTFSNP271 | acgttggatgTGCATCTCTTCAATCTCGC     | acgttggatgAAACAGGGGAACCACTTGTGC    | CATTAAATCGATTTCTGTAACCCAGATG   | G                    | A                     | 212                            | 59.1                              | CaChr6      | 10864322                | CAMTA                       |
| CaTFSNP272 | acgttggatgGATGAGGGCGAAATCCAAAGA   | acgttggatgTGACAGAAAATCTGCTCAAGTC   | CCATCAGATCATATAGATGCAAAAAGAA   | G                    | C                     | 186                            | 60.16                             | CaChr6      | 13242976                | C3H                         |
| CaTFSNP273 | acgttggatgCCGAGTTGCAAGAGAAAAGAG   | acgttggatgCCATGTGATGAGACGTTGCT     | CAGAAAAACAGAGTTGAAGAGTT        | G                    | A                     | 101                            | 59.25                             | CaChr6      | 13996302                | HMG                         |
| CaTFSNP274 | acgttggatgCTGCAGATTTCGCCACGACA    | acgttggatgAATGGTCCACCCATGGTAAAT    | GTTCAGGGGGTTAAATCCAA           | G                    | A                     | 211                            | 59.98                             | CaChr6      | 14815110                | CAMTA                       |
| CaTFSNP275 | acgttggatgTAAGCTTCATTGAGCTCGCTC   | acgttggatgCAACGATTTGTCGCTAACCC     | TCACAATCAACGATTTGTCGCTAACCC    | C                    | T                     | 100                            | 45.4                              | CaChr6      | 15273685                | Bromodomain                 |
| CaTFSNP276 | acgttggatgGGAATTTGTGTCCTCCGTAAG   | acgttggatgTGCAATGTAAAGTCAAGCTGTT   | ATCTACTTTTGCTCTATGGCCTTC       | T                    | C                     | 164                            | 59.77                             | CaChr6      | 15848050                | Jumonji                     |
| CaTFSNP277 | acgttggatgCGATACAGAACCCACACGAC    | acgttggatgGCATCCCAAGTGAAGCTCAT     | AAGATCTTACTTCTGCTTTAAGTCTTTG   | A                    | C                     | 203                            | 59.01                             | CaChr6      | 1843828                 | bZIP                        |
| CaTFSNP278 | acgttggatgGGGAGCTTGGATATGGCAGCA   | acgttggatgTGAGAGGGCTCATCATGACA     | GAAATTTGGGGGCTTTTGA            | A                    | T                     | 207                            | 59.89                             | CaChr6      | 18949559                | mTERF                       |
| CaTFSNP279 | acgttggatgTCCACCGCTGAGGTTTATAC    | acgttggatgCCAATCTTATCTGATGGCTC     | CCCCCTGATGTGGCTCAACCTT         | C                    | T                     | 109                            | 48.8                              | CaChr6      | 20519235                | NAC                         |
| CaTFSNP280 | acgttggatgCTTCTCCGACAGTTTCTGAC    | acgttggatgAGAGATGGGCTTGAAGGTC      | CATCAGCCAGCTGAACCC             | A                    | T                     | 101                            | 59.99                             | CaChr6      | 21437289                | Bromodomain                 |
| CaTFSNP281 | acgttggatgACCCCAAAAGGGTCCAAAAGA   | acgttggatgGCGATTTCTTGTGAGAGC       | TTGAGCGAGTTGCTCTATTTCG         | G                    | A                     | 205                            | 60.69                             | CaChr6      | 21497337                | bZIP                        |
| CaTFSNP282 | acgttggatgTCGTCAATTCGAGATGTGGT    | acgttggatgATATGCCATCATCCCATGCT     | TGGAAGGTGTTGAGCAAAATAGAA       | G                    | A                     | 211                            | 60.12                             | CaChr6      | 21675697                | HB                          |
| CaTFSNP283 | acgttggatgGGGGTCAACCTCCACTTTAC    | acgttggatgGGAGAGCGTGTGCGCAATTTG    | CCTTGATGCTCTTAGATTGATGATT      | C                    | C                     | 200                            | 60.42                             | CaChr6      | 21716470                | G2-like                     |
| CaTFSNP284 | acgttggatgTGCAATCCGGTTTCTTCTCTC   | acgttggatgCCACCAACCCGATGTTAAA      | GAGTTTCTGAATCAGAGATTTCT        | T                    | C                     | 109                            | 60.19                             | CaChr6      | 21777225                | AP2-EREBP                   |
| CaTFSNP285 | acgttggatgACACCAAGTGTGCGATTGG     | acgttggatgTGGGAGGCGTAACTGAGATG     | ATTGGAGGGGAGAGTTCTAG           | C                    | C                     | 100                            | 60.44                             | CaChr6      | 22228859                | E2F-DP                      |
| CaTFSNP286 | acgttggatgTGAATGACTGCGCCAAATAG    | acgttggatgTGGGTAACTCTTTGGCAAC      | ACTCTGACTTCTTGCGGCACA          | A                    | C                     | 205                            | 59.83                             | CaChr6      | 22711105                | ARF                         |
| CaTFSNP287 | acgttggatgTGTCCTCTCCCATGTTGTTT    | acgttggatgTGGAAGCTCAGGCACATTGTC    | TGTTGACACGACAGAGAAACCAT        | C                    | C                     | 202                            | 60.21                             | CaChr6      | 23284891                | NAC                         |
| CaTFSNP288 | acgttggatgTGATCGGGTCTATTGCGCTTC   | acgttggatgCTCTCAAACTCACAACCGTCC    | ACCTTCCCATTTAGGCGAC            | A                    | G                     | 116                            | 52.7                              | CaChr6      | 24586525                | bZIP                        |
| CaTFSNP289 | acgttggatgTTGCAATTTGAGAGGGGTTG    | acgttggatgATTCTTCTCTCCCTCGAC       | CTTCTCTCCCTCTCGACTC            | A                    | T                     | 183                            | 60.5                              | CaChr6      | 26357644                | GRAS                        |
| CaTFSNP290 | acgttggatgGGTGGCAGTGTTCCTGGAAT    | acgttggatgTCAGGATTCACCACTCGAAC     | CGAGAGACAGCTTGCCATC            | G                    | T                     | 199                            | 59.97                             | CaChr6      | 27861705                | C3H                         |
| CaTFSNP291 | acgttggatgCTCGGCCATACAAATGAACA    | acgttggatgATGGAGCATCATCTGGGAAC     | TCTTACAGATATGAGTGAACATGATGA    | A                    | A                     | 199                            | 59.54                             | CaChr6      | 28103045                | HB                          |
| CaTFSNP292 | acgttggatgTTCAGATCATCAAAATCGTCT   | acgttggatgTCTGTTTGTGCGCAACGTC      | ACAGAAATCAGTCAACAGCTAAATCAT    | A                    | C                     | 190                            | 59.71                             | CaChr6      | 30942481                | bZIP                        |
| CaTFSNP293 | acgttggatgATGGACCACTTTTGGAAGTG    | acgttggatgCCCATGTGCTCTCTCAGGAC     | GGAAAGTCCCTGATCTCTGA           | T                    | C                     | 88                             | 59.97                             | CaChr6      | 31477570                | E2F-DP                      |
| CaTFSNP294 | acgttggatgTAACCGGGTCTCTCGAATTG    | acgttggatgGGGCTGGATGTTTCAAAACC     | GGTAAAAACAGGGGAGGC             | G                    | T                     | 113                            | 48.8                              | CaChr6      | 31478512                | E2F-DP                      |
| CaTFSNP295 | acgttggatgCATCGGGTCTCTCTGCTTA     | acgttggatgTCCATTAGACTTTTATCAGATTG  | CATTAGACTTTTATCAGATTGCTTC      | T                    | C                     | 198                            | 60.21                             | CaChr6      | 32082602                | C2C2-YABBY                  |
| CaTFSNP296 | acgttggatgGGGATCTCTAATTGATGACG    | acgttggatgGGATCTTGGATTGGCTGCTA     | GATGGAGAGCGCGGATC              | G                    | A                     | 84                             | 60.44                             | CaChr6      | 32326867                | WRKY                        |
| CaTFSNP297 | acgttggatgTTCACCAACATCAACAGCC     | acgttggatgGGTGGTTTITTTGGTGAATG     | GGTGAATGAAGAGAGAAATTTGTTG      | G                    | T                     | 101                            | 50.6                              | CaChr6      | 37388155                | OPF                         |
| CaTFSNP298 | acgttggatgCCATTCCAAGGTGAAGGCTA    | acgttggatgGCTGGTTGCCGAGTTAGAAA     | GTACATCATGATTGTGTTTACCCTC      | A                    | A                     | 205                            | 60.07                             | CaChr6      | 45709378                | WRKY                        |
| CaTFSNP299 | acgttggatgGAACCGGCTTACTTCAATGTC   | acgttggatgAGGTTGATGATGAACCTTGC     | GGTGGAAGCACTGCTGAGAACCGTA      | T                    | G                     | 97                             | 59.85                             | CaChr6      | 45713690                | GRAS                        |
| CaTFSNP300 | acgttggatgTCTCCAAATGGAGGCAACATC   | acgttggatgGCTGTTGAGTTGAGAGAAGC     | AGAGAAGCTGGAACAAGG             | A                    | A                     | 103                            | 46.2                              | CaChr6      | 53173286                | WRKY                        |
| CaTFSNP301 | acgttggatgATTGGGACGCAATTGAGAAAT   | acgttggatgAATGCTTCTTGGGTGAGTGG     | AAATTTGCTGCAAGCGCGG            | T                    | C                     | 94                             | 59.85                             | CaChr6      | 53654154                | bHLH                        |
| CaTFSNP302 | acgttggatgTGGAAAAATGGAAGAACCTTG   | acgttggatgCCCAACCAACAGTACCAAGA     | GCCTCATTAATCAATTTAGAGACACTGA   | A                    | A                     | 213                            | 59.82                             | CaChr6      | 54359260                | GRAS                        |
| CaTFSNP303 | acgttggatgGTTGGAATGAGCATGCGGCT    | acgttggatgCCAATACCAAAAGCTTGAAG     | GCACTTAAATGGAAGTGTTTCTAG       | G                    | A                     | 182                            | 60.46                             | CaChr6      | 55333022                | HB                          |
| CaTFSNP304 | acgttggatgCAACATCTTCTCTTGAAGC     | acgttggatgAACACTCTGTTTTTGAAGGG     | GGAGGGTAAATCGAATAAGAAAGGT      | C                    | A                     | 99                             | 45.9                              | CaChr6      | 55637657                | ULF                         |
| CaTFSNP305 | acgttggatgAAGCTTCTCCAGCGCTTTGG    | acgttggatgCCATTGTGAACCTGTTGAGCTTG  | CTTCTCCAGCTTTTGA               | T                    | C                     | 117                            | 60.87                             | CaChr6      | 57024461                | MADS                        |
| CaTFSNP306 | acgttggatgCCATTGTGGAGTTTGGGATT    | acgttggatgTGGTACTGTGGGATCTGCTG     | CAAGACCATGATAACACGACTCA        | A                    | A                     | 200                            | 59.65                             | CaChr6      | 57532005                | FAR1                        |
| CaTFSNP307 | acgttggatgGGAAGGAAAAGAACCGTGAC    | acgttggatgCTCCATCGGAGATTGTAAG      | CGATTAAATGCAGCAAAAGAGTT        | T                    | C                     | 206                            | 59.72                             | CaChr6      | 57720386                | ABI3VP1                     |
| CaTFSNP308 | acgttggatgGTGCAAAAGCATGGCAGGC     | acgttggatgCATGATGAATCCCCAAGGAC     | AGACATTTTAACTGGGTTTGGAAAGTG    | G                    | A                     | 212                            | 60.1                              | CaChr6      | 58112367                | MYB-related                 |
| CaTFSNP309 | acgttggatgTTTGCCATGGAAGTGATTTC    | acgttggatgGGAAAAACCAACTCTCTCCA     | CACATAAGCAATAAGAGGATAATTTGTG   | T                    | A                     | 211                            | 59.93                             | CaChr6      | 58242882                | mTERF                       |
| CaTFSNP310 | acgttggatgTTGTGTGATTTAGGCAATTGG   | acgttggatgTTTTACATGAAGAATAGGTTCCA  | TTTTACATGAAGAATAGGTTCCA        | G                    | T                     | 100                            | 59.41                             | CaChr6      | 58555767                | bZIP                        |
| CaTFSNP311 | acgttggatgACAGCCACCGCTAAGGTTTTG   | acgttggatgCATTGAACCCGGTTCAGAC      | TCAGACCACAGCGCAG               | C                    | A                     | 100                            | 47.7                              | CaChr6      | 58810441                | C2C2-GATA                   |
| CaTFSNP312 | acgttggatgGCTTCTTCCCATTTGCTAACG   | acgttggatgTGAACCTCTGAAACACACTCTTG  | CTTTAGCTTCTTGGAAATCTT          | C                    | A                     | 110                            | 59.85                             | CaChr7      | 82458                   | CCAAT                       |
| CaTFSNP313 | acgttggatgTCTGGAGGACCAACCACTT     | acgttggatgCCGTTGACTCGCTAGTTATG     | TTTTGAGGAATACCTTTAACCTGTG      | A                    | C                     | 119                            | 60.36                             | CaChr7      | 217223                  | GRAS                        |
| CaTFSNP314 | acgttggatgTGAGCTTTCCCGATGTTGGT    | acgttggatgATCAACGGTGATGATGGAT      | CGTTTGAAGGTTGTTGATGTTAGT       | G                    | A                     | 211                            | 59.73                             | CaChr7      | 888424                  | WRKY                        |
| CaTFSNP315 | acgttggatgTTTAGAGGCGAGGTTGGTGT    | acgttggatgACCACGACACATTCACATA      | ATTCCGATGAAACCCCTCTT           | G                    | A                     | 209                            | 59.73                             | CaChr7      | 1270983                 | bHLH                        |
| CaTFSNP316 | acgttggatgACGGTATTTCGGGGAAAAAG    | acgttggatgCCTTTGGCTTCACTCCCTACA    | ACCCAACCTCAATTTGGTCTTC         | G                    | A                     | 207                            | 60.43                             | CaChr7      | 1799554                 | GNAT                        |
| CaTFSNP317 | acgttggatgACACCTTTTCCGGTGAGTTG    | acgttggatgGGTCAAAATCCAAATCCCAA     | GGTCAAAATCCAAATCCCAAAC         | G                    | T                     | 203                            | 60.01                             | CaChr7      | 2712407                 | WRKY                        |
| CaTFSNP318 | acgttggatgTAACACCGTTGATGGCGACTT   | acgttggatgGAAAGCGGACGGTTTGATA      | TTGGTGGTGGGTTTATTATG           | A                    | C                     | 109                            | 60.5                              | CaChr7      | 3238637                 | Tily                        |
| CaTFSNP319 | acgttggatgAACATGGAAGACAGTGAGGC    | acgttggatgCGGTGAGATTAAATTTTCTTAGAT | CAACTTTTAACTTACAAAGCTTTACA     | T                    | A                     | 96                             | 57.51                             | CaChr7      | 3353684                 | ARF                         |
| CaTFSNP320 | acgttggatgATCTTGGCTTCGCGAAGATC    | acgttggatgAGGAGGCTGAATCAGTCAAG     | AAAGTTCAACAAAAGAAATCTTAT       | C                    | T                     | 96                             | 47                                | CaChr7      | 3794570                 | SNF2                        |
| CaTFSNP321 | acgttggatgCTCTCTTTTCACTCTGCTCTT   | acgttggatgTCAGAAATGAAGAATCGAGCA    | CAGTCACTTCAATTAATCATTTCTT      | G                    | T                     | 120                            | 57.12                             | CaChr7      | 4598134                 | C2C2-GATA                   |
| CaTFSNP322 | acgttggatgCAGATCTCTGCTTTGTCCA     | acgttggatgTGCGGGTTTCCCAAGTTAC      | CAGCATGCAATTCCTTTACACA         | T                    | C                     | 201                            | 60.14                             | CaChr7      | 4624953                 | ARR-B                       |

| SNP IDs*   | 1st Pre-PCR primer sequence          | 2nd Pre-PCR primer sequence        | Unextended Primer sequence   | SNP allele (CC 4958) | SNP allele (CC 17160) | Size (bp) of alleles amplified | Actual annealing temperature (OC) | Chromosomes | Physical positions (bp) | Transcription factors (TFs) |
|------------|--------------------------------------|------------------------------------|------------------------------|----------------------|-----------------------|--------------------------------|-----------------------------------|-------------|-------------------------|-----------------------------|
| CaTFSNP323 | acgttggatgCCACCTTCGATCCACAATCT       | acgttggatgGGGTCGCAAGAGAGTATCCA     | TCCCAAAAAATACTCTCCACAA       | T                    | C                     | 211                            | 59.93                             | CaChr7      | 5280205                 | mTERF                       |
| CaTFSNP324 | acgttggatgAACCAGTAAGGTTTGG           | acgttggatgAGAGAAGAAAGGAGAAGGAT     | AAAGAGAGAGAGAATATATAT        | T                    | C                     | 82                             | 50.01                             | CaChr7      | 6812937                 | C2C2-YABBY                  |
| CaTFSNP325 | acgttggatgTATCGTGGAAATCTGGAAGCC      | acgttggatgCTATTGAAATCGGATCTGAG     | CCTCCATCGCGAAGATACTGATC      | T                    | C                     | 114                            | 46.4                              | CaChr7      | 7863835                 | bHLH                        |
| CaTFSNP326 | acgttggatgTGGTGGTGAACCAACAAC         | acgttggatgACAACCACAAGCAGCACAAG     | GCTGTGTGATGGAATGTTTGA        | G                    | A                     | 191                            | 59.29                             | CaChr7      | 8553174                 | zf-HD                       |
| CaTFSNP327 | acgttggatgAAAGTTGATTGTGCAGTTTGACA    | acgttggatgTCGAAGAGAATTTGATGACCAAA  | TTGCTAAAAATTTGTCATGTAGTTTCAA | G                    | C                     | 190                            | 59.71                             | CaChr7      | 10016133                | MYB-related                 |
| CaTFSNP328 | acgttggatgGTTGCGGTGAAGAGGAAGAG       | acgttggatgAAACCCAGTCGAAGTTGACG     | TTTGATGTGAACATGTTTAAAGA      | G                    | T                     | 119                            | 59.99                             | CaChr7      | 10114849                | AP2-EREBP                   |
| CaTFSNP329 | acgttggatgTTGAGAAGCTCACAAAAGACTTG    | acgttggatgTCGGCGTTTCACTTTCATAA     | CAACACAGTGTGTTTCTTTTCT       | G                    | A                     | 105                            | 58.82                             | CaChr7      | 10251662                | C2C2-GATA                   |
| CaTFSNP330 | acgttggatgCAAGAAAGTGATGTGCAACGG      | acgttggatgGCATGACTGCAAAATCCTCCT    | GACAAAATTAACAAAGGCCCGAA      | G                    | A                     | 215                            | 59.29                             | CaChr7      | 10485720                | SRS                         |
| CaTFSNP331 | acgttggatgGCCAAGGACTTGCCAACATAT      | acgttggatgTGGTTTGCTGAGGAAGCTCAA    | TTGAACACCATGATGAAGTG         | T                    | C                     | 99                             | 59.2                              | CaChr7      | 10686471                | ARR-B                       |
| CaTFSNP332 | acgttggatgCTGAAGCAACAGAGGTGGA        | acgttggatgCACCACCAAGCAGGAGTGA      | ACCACCACTAACACCAACCAAG       | G                    | A                     | 199                            | 59.01                             | CaChr7      | 11192772                | HB                          |
| CaTFSNP333 | acgttggatgTGATTTCTTTGGCTGAGAGAG      | acgttggatgCCGGTTGCAATTCATCTCTT     | GGTTTGGTATGGCGGTTGG          | A                    | T                     | 92                             | 59                                | CaChr7      | 11324293                | bZIP                        |
| CaTFSNP334 | acgttggatgTGAGAACTTTCCGATCACCG       | acgttggatgTCGATGACGTGGGAAGAATC     | GCCGACGGGTGTTTGGAG           | A                    | G                     | 114                            | 50.7                              | CaChr7      | 11546194                | LOB                         |
| CaTFSNP335 | acgttggatgGAGGTGGGTATTCAGATTTC       | acgttggatgCTTCAAGCTTCCATCAGTTC     | GTTCCTATTTTGTGTTGATCACT      | A                    | G                     | 86                             | 48.9                              | CaChr7      | 14470793                | FHA                         |
| CaTFSNP336 | acgttggatgAAATTCCTCCCAACTTGCCGC      | acgttggatgAAACCAACAAGGCAGTGGGC     | GGCTGCTGGACTCG               | G                    | A                     | 102                            | 49.8                              | CaChr7      | 17264124                | MYB-related                 |
| CaTFSNP337 | acgttggatgAAATTTGGTGGGTGGAAACCTT     | acgttggatgTGCCCTCAATTCCTCAAAAG     | GAATAACCCCTACCTCGATCCC       | T                    | C                     | 211                            | 60.46                             | CaChr7      | 17317735                | SET                         |
| CaTFSNP338 | acgttggatgTTTGGCTGTCAAAGCAAGAT       | acgttggatgGCTGTGTCAGGGTGTCTCATT    | GAATGAGGATCATATAGCATAAACC    | G                    | A                     | 203                            | 59.87                             | CaChr7      | 17780711                | bZIP                        |
| CaTFSNP339 | acgttggatgGGTCAACCAAGAAAGATTTCCA     | acgttggatgCAGCAGCAAGTGCTCTCATC     | CATCAATGATTAAGAAATGAA        | G                    | A                     | 103                            | 59.02                             | CaChr7      | 18389220                | Jumonji                     |
| CaTFSNP340 | acgttggatgCCTCACTTGTACATACTCAAC      | acgttggatgGAGGGTGATAGAGGAGAATC     | GTGGTGATGATGGTGT             | C                    | T                     | 102                            | 46                                | CaChr7      | 20367403                | bHLH                        |
| CaTFSNP341 | acgttggatgCCAACAAGAAAGCCCTAGAAA      | acgttggatgCAACAGGACTGCTTCAGTTTG    | AAACATGGGAGAGAGATTAAACC      | G                    | A                     | 120                            | 59.48                             | CaChr7      | 22826866                | bHLH                        |
| CaTFSNP342 | acgttggatgTGAAAAGAGGACCATATGCG       | acgttggatgACAACACACACCAACACAG      | AATTAAGCATCTACGCA            | C                    | A                     | 109                            | 46.9                              | CaChr7      | 27161185                | Atlin-like                  |
| CaTFSNP343 | acgttggatgTGCAACAAGTCAGCCATATC       | acgttggatgTGACTTGGTTTTCTGTAGGG     | GGGATTTCTAAGGCGAGTCTTTGG     | C                    | T                     | 116                            | 47.6                              | CaChr7      | 33299885                | Tify                        |
| CaTFSNP344 | acgttggatgTTCCCAATTCATTTACATTTCA     | acgttggatgCGAACGATGATAGCGAGGAC     | ACTAAAGCTTACTCTCTCTCTCTCTCTT | G                    | C                     | 99                             | 58.4                              | CaChr7      | 39769428                | C3H                         |
| CaTFSNP345 | acgttggatgAGAGAGGCACTGATCGATATC      | acgttggatgCCTCTTACTTCTCTGTGTCG     | TGGCGGTGATGTTTGA             | T                    | A                     | 104                            | 52.1                              | CaChr7      | 42243517                | RB                          |
| CaTFSNP346 | acgttggatgTGATGCTCGCTTGTCTGCG        | acgttggatgACCATGCTCCCAAAAGTCG      | ACGGGAATTACAGGTTTCGAT        | T                    | C                     | 206                            | 60.17                             | CaChr7      | 42245921                | RB                          |
| CaTFSNP347 | acgttggatgTGTTAGGCAAAATCTAGGAA       | acgttggatgCCGAGGGGAACTCATAGGAA     | CGCGAAATTCAGAGTGGG           | T                    | C                     | 211                            | 59.44                             | CaChr7      | 42246393                | RB                          |
| CaTFSNP348 | acgttggatgCGGAGTGAGTCGGAAATTTTC      | acgttggatgTGACTCACTCGGAGTCAAAAG    | CTGAGGAATTACCAAGGAGAAACATGTT | G                    | T                     | 96                             | 53.8                              | CaChr7      | 43044483                | CCAAT                       |
| CaTFSNP349 | acgttggatgGTTCTTCAATTCAGCAATAAG      | acgttggatgCTGTGTTGGTGCTATTTGG      | TTGTTATGGAGCAACTATTGA        | G                    | A                     | 106                            | 49.1                              | CaChr7      | 47237682                | HB                          |
| CaTFSNP350 | acgttggatgGCCCTGGCTGTGTGAATTTGC      | acgttggatgACCAAGTTGATGGAAGAGTGC    | GGGAAAGCTGGTACCC             | T                    | C                     | 101                            | 45.8                              | CaChr8      | 156866                  | SNF2                        |
| CaTFSNP351 | acgttggatgAAATTCCTCCAGAGTGTGCG       | acgttggatgTAGTCCGCAAGAGGACCAC      | CAAGGTGGTATGATGTTGGTTTT      | G                    | A                     | 234                            | 59.38                             | CaChr8      | 498219                  | FHA                         |
| CaTFSNP352 | acgttggatgCGTGGGATCAATTGAAGAGG       | acgttggatgTGCAAGGCGGTTAATTTCTC     | AGGACAGGAGAGAAATGTTGGA       | G                    | A                     | 200                            | 60.45                             | CaChr8      | 510120                  | SNF2                        |
| CaTFSNP353 | acgttggatgGCCAAGCTGGCAATACCTGT       | acgttggatgAGCAAGAGGATGGCATCAA      | TGGCAATACCTCTACCCCAATA       | G                    | A                     | 200                            | 60.14                             | CaChr8      | 666619                  | GNAT                        |
| CaTFSNP354 | acgttggatgTCAATGGTAAACCCGAAAGG       | acgttggatgGTTGCTGACTTTGGCCATTT     | GCAGATTCATACCTGATTTGGAAA     | G                    | A                     | 208                            | 59.79                             | CaChr8      | 891777                  | GNAT                        |
| CaTFSNP355 | acgttggatgGTTGGCCTGACCATGTCTTT       | acgttggatgTGGGTCTTTTGGAAAAGAG      | AAGAAAGCCCTCTTCACTCTCTCT     | T                    | C                     | 203                            | 59.97                             | CaChr8      | 1261904                 | C3H                         |
| CaTFSNP356 | acgttggatgGGATAGGGAACAATTCACCG       | acgttggatgTTGCCAAGAACACCTTCG       | CGAAGCTGCTTTTCTCTG           | C                    | T                     | 98                             | 47.4                              | CaChr8      | 1434072                 | AP2-EREBP                   |
| CaTFSNP357 | acgttggatgCCGGAAATGAGGCTACTAAGG      | acgttggatgCGGCAATTAGGCTTCTTCAG     | CTTGAAATTTCAAGAGTAAACCTTCTC  | T                    | C                     | 209                            | 60.1                              | CaChr8      | 1753840                 | Jumonji                     |
| CaTFSNP358 | acgttggatgGAATTTGAGATGTAAGGAGGAAA    | acgttggatgCATGTTGTTGCCACCAATTC     | AGAAGAGCTGGTAAATGGC          | A                    | T                     | 99                             | 59.85                             | CaChr8      | 2011749                 | HB                          |
| CaTFSNP359 | acgttggatgCGCTTTTGATTTTGTCACTCC      | acgttggatgTGCGTATTGACGTGGCTTTA     | CTTCTATCTCTTTATTTTTTATTTCTGT | A                    | C                     | 101                            | 59.74                             | CaChr8      | 2580625                 | AP2-EREBP                   |
| CaTFSNP360 | acgttggatgAGTGTTCACCCCAATTCGAC       | acgttggatgGCAAAACCTGAAGACTGCAA     | GATTTGCACTATCTAATCT          | G                    | C                     | 76                             | 59.83                             | CaChr8      | 2664948                 | C2C2-GATA                   |
| CaTFSNP361 | acgttggatgTGTGCGTGTCTATTAGCATTTG     | acgttggatgTTGATGGAGAAATAGTATGACAGA | TTGTCATAGAAAATGCTCCTCAATAT   | A                    | C                     | 85                             | 58.91                             | CaChr8      | 2704215                 | Tify                        |
| CaTFSNP362 | acgttggatgGGTTTGGCATCTTACACAAG       | acgttggatgCCCTTCATTGAGAAGAAGAG     | GGTTTGAATTTGATGTTGGTAAGGAGTA | C                    | T                     | 98                             | 51                                | CaChr8      | 2974401                 | ARR-B                       |
| CaTFSNP363 | acgttggatgTCGTTATGGAGAAATTAACACATC   | acgttggatgTTGGTTGGCAATTTGTGAAA     | CGTATGGAGAAATTAACACATC       | G                    | T                     | 112                            | 58.56                             | CaChr8      | 3154021                 | bHLH                        |
| CaTFSNP364 | acgttggatgAAACATCTCTGTGCCCTCTGT      | acgttggatgACTGGAGCCAACCATTTGAG     | TATGAGATGATGCGCGATGA         | T                    | C                     | 195                            | 60.43                             | CaChr8      | 3396641                 | BSD                         |
| CaTFSNP365 | acgttggatgGAGAGAAAAGAAAGAAATAACAAATG | acgttggatgGCGGATGTGTTGGAGAGAC      | GAGAAAAGAAAGAAATAACAAATG     | A                    | T                     | 115                            | 58.13                             | CaChr8      | 3456812                 | GNAT                        |
| CaTFSNP366 | acgttggatgTGAAGCGTTAGCGGTTAATTG      | acgttggatgCCGATCAACGACGATATGAA     | CGGTTAATTGTGTTAAGCGTTT       | G                    | A                     | 96                             | 60.26                             | CaChr8      | 3521637                 | GRAS                        |
| CaTFSNP367 | acgttggatgCCATTGAAGACAAGGGCGTA       | acgttggatgCCTCTCTTCCCAATTTTCC      | AAACTCTAGCTTTAATCTCACTTTCAT  | A                    | T                     | 208                            | 61.02                             | CaChr8      | 3682384                 | LOB                         |
| CaTFSNP368 | acgttggatgGGAACCAAAAGGGCTTCATCA      | acgttggatgGGTGGCTCTGGTGAATTTGT     | ATCCCACTCACAATCCGAA          | G                    | T                     | 204                            | 60.05                             | CaChr8      | 3998501                 | AP2-EREBP                   |
| CaTFSNP369 | acgttggatgTATGAGCCAGATAGAGCTCG       | acgttggatgCTTCTTTGCACACCACTTG      | CCACTGAAGGAGCA               | C                    | T                     | 116                            | 45.2                              | CaChr8      | 4056195                 | SET                         |
| CaTFSNP370 | acgttggatgGCCATCATCAGACTCAACA        | acgttggatgTGATGATGCACITTAGCGTA     | GAAAGCGCGGTTCACTCTC          | G                    | C                     | 102                            | 59.84                             | CaChr8      | 4176714                 | FHA                         |
| CaTFSNP371 | acgttggatgTCATCATCAAAATTCGCCCTTG     | acgttggatgCATATGCCAACGACTTTCAG     | GCCTGCTGACGCTGAGT            | G                    | A                     | 205                            | 59.62                             | CaChr8      | 4421071                 | LOB                         |
| CaTFSNP372 | acgttggatgCATTTGATCTCTGTGGGGACA      | acgttggatgACGACCAAGCAATTCATCTC     | GTGGGGACATGTCTGAATC          | G                    | A                     | 101                            | 59.47                             | CaChr8      | 4623320                 | HB                          |
| CaTFSNP373 | acgttggatgGCATACCTTCTCTCAGACTC       | acgttggatgCTATGGTGAGTTCTCAAGCG     | CAAGAGGAGTTAGATGTGTTTCTGT    | A                    | T                     | 93                             | 50.65                             | CaChr8      | 5413114                 | SRS                         |
| CaTFSNP374 | acgttggatgGCAGACTTGGAAATGGCTCTC      | acgttggatgGGTCTGAACCGGAGTTTGA      | GAGAATAAGCCCAAAAGCCC         | G                    | T                     | 198                            | 59.96                             | CaChr8      | 5508790                 | C2C2-GATA                   |
| CaTFSNP375 | acgttggatgCCCAAGTCTCCAAGTGGTGT       | acgttggatgCAGTGGAGCCATATACAGCAA    | TCATGCCCAATGTTGCTG           | T                    | C                     | 206                            | 60                                | CaChr8      | 5564404                 | C3H                         |
| CaTFSNP376 | acgttggatgAGTTACTCTCTAAGCTTCTCC      | acgttggatgGTCTGAAATCAATGATGACG     | TGAAGATGATGATGAGTAAAGTTGGC   | G                    | T                     | 109                            | 53.7                              | CaChr8      | 6618347                 | HMG                         |
| CaTFSNP377 | acgttggatgAAGGAATTTTCCGACACCA        | acgttggatgTGCCCTACTCTCTCCCTCA      | CTCCCTCTCAAGCTTTTCCAT        | G                    | A                     | 195                            | 59.55                             | CaChr8      | 7520805                 | Trihelix                    |
| CaTFSNP378 | acgttggatgTTGAGCTGCATGACGACAAT       | acgttggatgTGCTAGAAGATTCGCCCTCCA    | CCACAAAGTGATAGTGTGCACAC      | A                    | T                     | 108                            | 60.42                             | CaChr8      | 7772710                 | E2F-DP                      |
| CaTFSNP379 | acgttggatgGCCACCATCGTTGGATTAG        | acgttggatgAGGGACAGGAATCATTTGTG     | AGGAACAAGGTGGAATTTGA         | G                    | A                     | 111                            | 45.3                              | CaChr8      | 8362560                 | HB                          |
| CaTFSNP380 | acgttggatgTCCAAGATGTTGATTCAGA        | acgttggatgGCTTCGTTGACTCGGTTTTT     | TGATTTGTCACATATAGTATGG       | T                    | C                     | 99                             | 59.43                             | CaChr8      | 11675561                | Tify                        |
| CaTFSNP381 | acgttggatgAAAAACCCCTTCATCCGTACC      | acgttggatgAACTGATGGAGATGTTCTG      | ATGTTTCTGATTTGTTTGGAA        | G                    | A                     | 108                            | 46.9                              | CaChr8      | 12525828                | MYB-related                 |
| CaTFSNP382 | acgttggatgTTGGACCCAAGAAATTTTTC       | acgttggatgCAGTTGCACAAGAAGAAAGGA    | CTTCTTTAGCATCAAAACTTCCAAC    | T                    | C                     | 201                            | 60.09                             | CaChr8      | 13906178                | C2C2-CO-like                |
| CaTFSNP383 | acgttggatgAAAGACCCGAACCTTCGCCCTC     | acgttggatgTGGTGAATCGGCTTATAGG      | GGGTATATTAATTTCCGGTGTTC      | A                    | G                     | 111                            | 46.1                              | CaChr8      | 14719923                | SWI/SNF-SWI3                |
| CaTFSNP384 | acgttggatgATCTCAGCCATTGGATCTTC       | acgttggatgGATACGAGCTAATCCAACGG     | CCCAATCCAAGGTCCACG           | T                    | A                     | 86                             | 49.5                              | CaChr8      | 16090020                | C3H                         |

\*CaTFSNP *Cicer arietinum* Transcription Factor gene-derived SNP  
# two informative TF gene-derived SNPs in combination with seven microsatellite markers discriminated all the 94 cultivated and wild *Cicer* accessions from each other
